# Supplementary material for: Neonatal mortality and leading causes of deaths: a descriptive study in China, 2014–2018
Source: PubMed Central journal article supplement — BMJ Open. 2021 Feb 4;11(2):e042654. doi: 10.1136/bmjopen-2020-042654 (PMC7868219; doi:10.1136/bmjopen-2020-042654), 2021-02-04

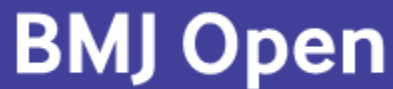

BMJ Open is committed to open peer review. As part of this commitment we make the peer review history of every article we publish publicly available.

When an article is published we post the peer reviewers' comments and the authors' responses online. We also post the versions of the paper that were used during peer review. These are the versions that the peer review comments apply to.

The versions of the paper that follow are the versions that were submitted during the peer review process. They are not the versions of record or the final published versions. They should not be cited or distributed as the published version of this manuscript.

BMJ Open is an open access journal and the full, final, typeset and author-corrected version of record of the manuscript is available on our site with no access controls, subscription charges or pay-per-view fees (<http://bmjopen.bmj.com>).

If you have any questions on BMJ Open's open peer review process please email [info.bmjopen@bmj.com](mailto:info.bmjopen@bmj.com)

# BMJ Open

## The analysis for the neonatal mortality and leading causes of deaths in China from 2014 to 2018

|                               |                                                                                                                                                                                                                                                                                                                                                                                                                                                                                                                                                                                                                                                                                                                                                                                                                                                                                                                                                                                                                                                                                                                                                                                                                                                                                                                                                                                                                                                                                                                                                                                                                                                                                                                                        |
|-------------------------------|----------------------------------------------------------------------------------------------------------------------------------------------------------------------------------------------------------------------------------------------------------------------------------------------------------------------------------------------------------------------------------------------------------------------------------------------------------------------------------------------------------------------------------------------------------------------------------------------------------------------------------------------------------------------------------------------------------------------------------------------------------------------------------------------------------------------------------------------------------------------------------------------------------------------------------------------------------------------------------------------------------------------------------------------------------------------------------------------------------------------------------------------------------------------------------------------------------------------------------------------------------------------------------------------------------------------------------------------------------------------------------------------------------------------------------------------------------------------------------------------------------------------------------------------------------------------------------------------------------------------------------------------------------------------------------------------------------------------------------------|
| Journal:                      | <i>BMJ Open</i>                                                                                                                                                                                                                                                                                                                                                                                                                                                                                                                                                                                                                                                                                                                                                                                                                                                                                                                                                                                                                                                                                                                                                                                                                                                                                                                                                                                                                                                                                                                                                                                                                                                                                                                        |
| Manuscript ID                 | bmjopen-2020-042654                                                                                                                                                                                                                                                                                                                                                                                                                                                                                                                                                                                                                                                                                                                                                                                                                                                                                                                                                                                                                                                                                                                                                                                                                                                                                                                                                                                                                                                                                                                                                                                                                                                                                                                    |
| Article Type:                 | Original research                                                                                                                                                                                                                                                                                                                                                                                                                                                                                                                                                                                                                                                                                                                                                                                                                                                                                                                                                                                                                                                                                                                                                                                                                                                                                                                                                                                                                                                                                                                                                                                                                                                                                                                      |
| Date Submitted by the Author: | 04-Aug-2020                                                                                                                                                                                                                                                                                                                                                                                                                                                                                                                                                                                                                                                                                                                                                                                                                                                                                                                                                                                                                                                                                                                                                                                                                                                                                                                                                                                                                                                                                                                                                                                                                                                                                                                            |
| Complete List of Authors:     | <p>Liu, Yuxi; Sichuan University West China Second University Hospital, National Office for Maternal and Child Health Surveillance of China</p> <p>Kang, Leni; Sichuan University West China Second University Hospital, National Office for Maternal and Child Health Surveillance of China</p> <p>He, Chunhua; Sichuan University West China Second University Hospital, National Office for Maternal and Child Health Surveillance of China</p> <p>Miao, Lei; Sichuan University West China Second University Hospital, National Office for Maternal and Child Health Surveillance of China</p> <p>Qiu, Xiaoqiong; Pidun district people's hospital, Chengdu, Sichuan</p> <p>Xia, Weipeng; Second People's Hospital of Zhaotong, Zhaotong, Yunnan, Department of Pediatrics</p> <p>Zhu, Jun; Sichuan University West China Second University Hospital, Key Laboratory of Birth Defects and Related Diseases of Women and Children of the Ministry of Education, West China Second University Hospital, Sichuan University, Chengdu, China; Sichuan University West China Second University Hospital, National Office for Maternal and Child Health Surveillance of China</p> <p>Liang, Juan; Sichuan University West China Second University Hospital, National Office for Maternal and Child Health Surveillance of China</p> <p>Li, Qi; Sichuan University West China Second University Hospital, National Office for Maternal and Child Health Surveillance of China</p> <p>Wang, Yanping; Sichuan University West China Second University Hospital, National Office for Maternal and Child Health Surveillance of China</p> <p>Liu, Min; Sichuan University West China Second University Hospital, Department of Pediatrics</p> |
| Keywords:                     | PUBLIC HEALTH, EPIDEMIOLOGY, NEONATOLOGY                                                                                                                                                                                                                                                                                                                                                                                                                                                                                                                                                                                                                                                                                                                                                                                                                                                                                                                                                                                                                                                                                                                                                                                                                                                                                                                                                                                                                                                                                                                                                                                                                                                                                               |
|                               |                                                                                                                                                                                                                                                                                                                                                                                                                                                                                                                                                                                                                                                                                                                                                                                                                                                                                                                                                                                                                                                                                                                                                                                                                                                                                                                                                                                                                                                                                                                                                                                                                                                                                                                                        |

SCHOLARONE™  
Manuscripts

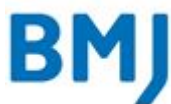

I, the Submitting Author has the right to grant and does grant on behalf of all authors of the Work (as defined in the below author licence), an exclusive licence and/or a non-exclusive licence for contributions from authors who are: i) UK Crown employees; ii) where BMJ has agreed a CC-BY licence shall apply, and/or iii) in accordance with the terms applicable for US Federal Government officers or employees acting as part of their official duties; on a worldwide, perpetual, irrevocable, royalty-free basis to BMJ Publishing Group Ltd ("BMJ") its licensees and where the relevant Journal is co-owned by BMJ to the co-owners of the Journal, to publish the Work in this journal and any other BMJ products and to exploit all rights, as set out in our [licence](#).

The Submitting Author accepts and understands that any supply made under these terms is made by BMJ to the Submitting Author unless you are acting as an employee on behalf of your employer or a postgraduate student of an affiliated institution which is paying any applicable article publishing charge ("APC") for Open Access articles. Where the Submitting Author wishes to make the Work available on an Open Access basis (and intends to pay the relevant APC), the terms of reuse of such Open Access shall be governed by a Creative Commons licence – details of these licences and which [Creative Commons](#) licence will apply to this Work are set out in our licence referred to above.

Other than as permitted in any relevant BMJ Author's Self Archiving Policies, I confirm this Work has not been accepted for publication elsewhere, is not being considered for publication elsewhere and does not duplicate material already published. I confirm all authors consent to publication of this Work and authorise the granting of this licence.

**The analysis for the neonatal mortality and leading causes of deaths in China from  
2014 to 2018**

Yuxi Liu, MIPH, MHM<sup>a</sup>; Leni Kang, PhD<sup>a</sup>; Chunhua He, MD<sup>a</sup>; Lei Miao, MD<sup>a</sup>; Xiaoqiong Qiu, MD<sup>d</sup>; Weipeng Xia, MD<sup>e</sup>; Jun Zhu, MD<sup>a,c</sup>; Juan Liang, MD<sup>a</sup>; Qi Li, MD<sup>a</sup>; Yanping Wang, MD<sup>a</sup>▲; Hanmin Liu, PhD<sup>b,c</sup>▲.

<sup>a</sup> National Office for Maternal and Child Health Surveillance of China, West China Second University Hospital, Sichuan University, Chengdu, Sichuan, China

<sup>b</sup> Department of Pediatrics, West China Second University Hospital, Sichuan University, Chengdu, China

<sup>c</sup> Key Laboratory of Birth Defects and Related Diseases of Women and Children of the Ministry of Education, West China Second University Hospital, Sichuan University, Chengdu, China

<sup>d</sup> Pidu district people's hospital, Chengdu, Sichuan, China

<sup>e</sup> Department of Pediatrics, Second People's Hospital of Zhaotong, Zhaotong, Yunnan, China

▲ These authors contributed equally to this work.

1  
2  
3  
4  
5  
6  
7  
8  
9  
10  
11  
12  
13  
14  
15  
16  
17  
18  
19  
20  
21  
22  
23  
24  
25  
26  
27  
28  
29  
30  
31  
32  
33  
34  
35  
36  
37  
38  
39  
40  
41  
42  
43  
44  
45  
46  
47  
48  
49  
50  
51  
52  
53  
54  
55  
56  
57  
58  
59  
60

**Corresponding authors:** Yanping Wang, National Office for Maternal and Child Health Surveillance of China, West China Second University Hospital, Sichuan University, Chengdu, Sichuan, China, email: wyxianping@163.com; and Hanmin Liu; Department of Pediatrics, West China Second University Hospital, Sichuan University, Chengdu, China, email: hanmin@vip.163.com

## Abstract

**Objective:** The present study estimated the national and urban-rural levels and causes of neonatal deaths in China annually between 2014 and 2018 to provide data support for the further end of preventable neonatal deaths for China and other low-and middle-income countries.

**Methods:** The study was based on data from the National Maternal and Child Health Surveillance System (NMCHSS). All neonates of surveillance districts (gestational week  $\geq 28$  weeks) who died after delivery have been involved in the study. The mortality rate and the leading causes of death for neonates were analyzed.

**Results:** The NMR of China has steadily decreased from 5.9 deaths per 1000 live births in 2014 to 3.9 deaths per 1000 live births in 2018. The NMR in 2018 of urban and rural areas was 2.2 deaths per 1000 live births and 4.7 deaths per 1000 live births, respectively. The leading preventable death causes of neonatal deaths in 2018 were preterm birth (106.6 deaths per 100,000 live births), intrapartum complications (84.6 deaths per 100,000 live births), and pneumonia (35.0 deaths per 100,000 live births). Mortality rates of these three causes fell significantly between 2014 and 2018, but contributed to a higher proportion of deaths in rural areas than urban areas. The proportion of preventable deaths accounted for 73.9% in 2018.

**Conclusions:** The NMR of China has decreased steadily from 2014 to 2018. However, the inequality between urban and rural areas still exists. The goal of government interventions

1  
2  
3  
4  
5  
6  
7  
8  
9  
10  
11  
12  
13  
14  
15  
16  
17  
18  
19  
20  
21  
22  
23  
24  
25  
26  
27  
28  
29  
30  
31  
32  
33  
34  
35  
36  
37  
38  
39  
40  
41  
42  
43  
44  
45  
46  
47  
48  
49  
50  
51  
52  
53  
54  
55  
56  
57  
58  
59  
60

should be to reduce the health inequality of neonates and further take targeted measures to eliminate the preventable neonatal death.

**Keywords:** neonatal mortality, leading cause, Surveillance, inequality, China

**Strengths and limitations of this study**

- The study covers the most geographically extensive newborn population in mainland China, the data are from 334 National Maternal and Child Health Surveillance Districts.
- The study provides describes the status of neonatal deaths in China from 2014 to 2018.
- The study has not covered pre-natal assessment due to system design limitation.

## Introduction

In 2015, the United Nations (UN) summit on sustainable development formally adopted the 2030 agenda for sustainable development. The UN has proposed 17 sustainable development goals (SDG) from three key economic, social, and environmental dimensions. In SDG3, the goal is to end preventable neonatal and under-five children deaths by 2030<sup>[1]</sup>, with all countries aiming to reduce neonatal mortality to at least as low as 12 deaths per 1,000 live births and under-five mortality to at least as low as 25 deaths per 1,000 live births. The importance of newborn health issues has received global attention. The Chinese government has always attached great importance to the survival, protection, and development of children, and has made great achievements in reducing child mortality.

The MDG4 (Millennium Development Goal 4) was achieved eight years ahead of schedule in 2007<sup>[2-7]</sup>, and it is also rated by the World Health Organization as a country with "high performance in maternal and child health". In 2018, the mortality rate of children under five (U5MR) in China was 8.4‰, which was lower than 25 per 1000 live births by 2030<sup>[8]</sup>. The biggest challenge for China in the face of the SDGs is to eliminate preventable neonatal and children under 5 deaths. This study will analyze neonatal mortality trends and its mortality of major causes of death in China from 2014 to 2018 to provide data support for the further elimination of key preventable diseases that can cause neonatal deaths.

## Materials and Methods

*Study subjects*

The study covered all the 334 districts of National Maternal and Child Health Surveillance Districts (with 124 urban districts and 210 rural districts) in 31 provinces, autonomous regions, and municipalities of China. Further details about the National Maternal and Child Health Surveillance System (NMCHSS) have been described elsewhere<sup>[9]</sup>.

All neonates of surveillance districts (gestational week  $\geq 28$  weeks) who died after delivery, and had one of the four vital signs would be involved in surveillance subject, including heartbeat, breath, umbilical cord pulsation, and voluntary muscle contraction. The surveillance subject also includes adoption children and children of non-local household residents whose mothers have living in the surveillance districts for more than one year.

*Data collection and quality control*

After each child died in the surveillance districts, the local village doctor (or community doctor) needs to report to the local township health centers (or community health service centers) within 10 days. Local township health centers (or community health service centers) need to be verified within 7 days after reporting and fill the Child Death Report Card based on the hospital's death diagnosis. If the child died at home or on the way to the health facilities, infer the cause of death would base on 2016 WHO Verbal Autopsy

Standards<sup>[10]</sup> and then fill the Child Death Report Card. The classification of diseases according to the international classification of diseases-10 (ICD-10).

The children's mortality data was reported level by level, and the data is timely reported through the network direct reporting system. Technical personnel responsible for monitoring work are set up at all levels to complete the collection, review, and operation of surveillance data. The completed child death data would send to the county (or district) level maternal and child health institutions each season. The county (or district) level maternal and child health institutions would report the local child deaths status to prefecture-level and province-level maternal and child health institutions each season, the National Office of Maternal and Child Health would summarize and analyzes the data finally.

For quality control, we have used the regular level-by-level on-site quality control system. At the county (district), city, and provincial levels, following the requirements of the Chinese Maternal and Child Health Surveillance Work Manual, a multi-source data cross-check method is used to complete the on-site quality control work in sampling surveillance districts. The National Office of Maternal and Child Health will select 18 districts in 6 provinces each year for quality inspection<sup>[9,11]</sup>.

*Statistical analysis*

Results were collected in Microsoft Excel and analyzed using SPSS 22.0 (IBM, Armonk, NY, USA). The neonatal mortality rates (NMR) of different regions and the main cause-specific mortality rates were corrected using the average underreporting rate of the national-level surveillance data quality checks in the past three years. The national NMR and the main cause-specific mortality rate were weighted calculated according to the proportion of the urban and rural population in the census. The diagnostic level composition ratio of the neonate is calculated based on the reported Child Death Report Card, excluding children who died of accidental injuries<sup>[11]</sup>.

The Poisson regression model was used to calculate the average annual rate of decline of NMR, cause-of-death mortality, and its 95% confidence interval in the country, urban and rural areas, respectively. Linear by the linear association in the chi-square test using SPSS software was used to test whether there was a linear downward trend in different regions and causes of death.

*Ethics approval and consent to participate*

This study was approved by the Ethics Committee of West China Second University Hospital, Sichuan University, China.

### *Patient and public involvement*

Patients and members of the public were not involved in the design of this study.

### *Data Availability Statement*

This study used data from the NMCHSS. This system is co-established by the National Health and Family Planning Commission of the People Republic of China and Sichuan University, and finally owned by National Health and Family Planning Commission of the People Republic of China. The researchers did not obtain consent to publicly share data. The de-identified data set is available upon request to interested researchers. For data requests, please contact the Department of Science and Technology of West China Second University Hospital, Sichuan University, at:fu2yuankjb@163.com. This department is in charge of all the programs in the hospital, including the data management. One staff from the department (named Xian He) monitors this email.

## **Result**

1  
2  
3  
4 *1. The NMR of China from 2014 to 2018*  
5  
6

7 At the national level, the NMR of China has steadily decreased from 5.9 deaths per 1000  
8 live births in 2014 to 3.9 deaths per 1000 live births in 2018 ( $p<0.001$ ), the average  
9 annual rate of decline was 10.7%. The NMR of urban and rural areas have both showed a  
10 declining trend in the same period ( $p<0.001$ ). The mortality rate of urban areas  
11 decreased from 3.5 deaths per 1000 live births to 2.2 deaths per 1000 live births, with the  
12 average annual rate of decline was 13.0%. In rural areas, the NMR decreased significantly  
13 from 2014 to 2018 (6.9 deaths per 1000 live births to 4.7 deaths per 1000 live births, the  
14 average annual rate of decline was 10.6%,  $p<0.001$ ). The absolute difference between  
15 NMR of urban and rural areas has reduced from 3.4 deaths per 1000 live births to 2.5 deaths  
16 per 1000 live births, but the relative difference has increased from 2.0 to 2.2. (See **Figure**  
17  
18  
19  
20  
21  
22  
23  
24  
25  
26  
27  
28  
29  
30  
31  
32  
33  
34  
35  
36  
37  
38  
39  
40  
41  
42  
43  
44  
45  
46  
47  
48  
49  
50  
51  
52  
53  
54  
55  
56  
57  
58  
59  
60

61  
62  
63  
64  
65  
66  
67  
68  
69  
70  
71  
72  
73  
74  
75  
76  
77  
78  
79  
80  
81  
82  
83  
84  
85  
86  
87  
88  
89  
90  
91  
92  
93  
94  
95  
96  
97  
98  
99  
100  
101  
102  
103  
104  
105  
106  
107  
108  
109  
110  
111  
112  
113  
114  
115  
116  
117  
118  
119  
120  
121  
122  
123  
124  
125  
126  
127  
128  
129  
130  
131  
132  
133  
134  
135  
136  
137  
138  
139  
140  
141  
142  
143  
144  
145  
146  
147  
148  
149  
150  
151  
152  
153  
154  
155  
156  
157  
158  
159  
160  
161  
162  
163  
164  
165  
166  
167  
168  
169  
170  
171  
172  
173  
174  
175  
176  
177  
178  
179  
180  
181  
182  
183  
184  
185  
186  
187  
188  
189  
190  
191  
192  
193  
194  
195  
196  
197  
198  
199  
200  
201  
202  
203  
204  
205  
206  
207  
208  
209  
210  
211  
212  
213  
214  
215  
216  
217  
218  
219  
220  
221  
222  
223  
224  
225  
226  
227  
228  
229  
230  
231  
232  
233  
234  
235  
236  
237  
238  
239  
240  
241  
242  
243  
244  
245  
246  
247  
248  
249  
250  
251  
252  
253  
254  
255  
256  
257  
258  
259  
260  
261  
262  
263  
264  
265  
266  
267  
268  
269  
270  
271  
272  
273  
274  
275  
276  
277  
278  
279  
280  
281  
282  
283  
284  
285  
286  
287  
288  
289  
290  
291  
292  
293  
294  
295  
296  
297  
298  
299  
300  
301  
302  
303  
304  
305  
306  
307  
308  
309  
310  
311  
312  
313  
314  
315  
316  
317  
318  
319  
320  
321  
322  
323  
324  
325  
326  
327  
328  
329  
330  
331  
332  
333  
334  
335  
336  
337  
338  
339  
340  
341  
342  
343  
344  
345  
346  
347  
348  
349  
350  
351  
352  
353  
354  
355  
356  
357  
358  
359  
360  
361  
362  
363  
364  
365  
366  
367  
368  
369  
370  
371  
372  
373  
374  
375  
376  
377  
378  
379  
380  
381  
382  
383  
384  
385  
386  
387  
388  
389  
390  
391  
392  
393  
394  
395  
396  
397  
398  
399  
400  
401  
402  
403  
404  
405  
406  
407  
408  
409  
410  
411  
412  
413  
414  
415  
416  
417  
418  
419  
420  
421  
422  
423  
424  
425  
426  
427  
428  
429  
430  
431  
432  
433  
434  
435  
436  
437  
438  
439  
440  
441  
442  
443  
444  
445  
446  
447  
448  
449  
450  
451  
452  
453  
454  
455  
456  
457  
458  
459  
460  
461  
462  
463  
464  
465  
466  
467  
468  
469  
470  
471  
472  
473  
474  
475  
476  
477  
478  
479  
480  
481  
482  
483  
484  
485  
486  
487  
488  
489  
490  
491  
492  
493  
494  
495  
496  
497  
498  
499  
500  
501  
502  
503  
504  
505  
506  
507  
508  
509  
510  
511  
512  
513  
514  
515  
516  
517  
518  
519  
520  
521  
522  
523  
524  
525  
526  
527  
528  
529  
530  
531  
532  
533  
534  
535  
536  
537  
538  
539  
540  
541  
542  
543  
544  
545  
546  
547  
548  
549  
550  
551  
552  
553  
554  
555  
556  
557  
558  
559  
560  
561  
562  
563  
564  
565  
566  
567  
568  
569  
570  
571  
572  
573  
574  
575  
576  
577  
578  
579  
580  
581  
582  
583  
584  
585  
586  
587  
588  
589  
590  
591  
592  
593  
594  
595  
596  
597  
598  
599  
600  
601  
602  
603  
604  
605  
606  
607  
608  
609  
610  
611  
612  
613  
614  
615  
616  
617  
618  
619  
620  
621  
622  
623  
624  
625  
626  
627  
628  
629  
630  
631  
632  
633  
634  
635  
636  
637  
638  
639  
640  
641  
642  
643  
644  
645  
646  
647  
648  
649  
650  
651  
652  
653  
654  
655  
656  
657  
658  
659  
660  
661  
662  
663  
664  
665  
666  
667  
668  
669  
670  
671  
672  
673  
674  
675  
676  
677  
678  
679  
680  
681  
682  
683  
684  
685  
686  
687  
688  
689  
690  
691  
692  
693  
694  
695  
696  
697  
698  
699  
700  
701  
702  
703  
704  
705  
706  
707  
708  
709  
710  
711  
712  
713  
714  
715  
716  
717  
718  
719  
720  
721  
722  
723  
724  
725  
726  
727  
728  
729  
730  
731  
732  
733  
734  
735  
736  
737  
738  
739  
740  
741  
742  
743  
744  
745  
746  
747  
748  
749  
750  
751  
752  
753  
754  
755  
756  
757  
758  
759  
760  
761  
762  
763  
764  
765  
766  
767  
768  
769  
770  
771  
772  
773  
774  
775  
776  
777  
778  
779  
780  
781  
782  
783  
784  
785  
786  
787  
788  
789  
790  
791  
792  
793  
794  
795  
796  
797  
798  
799  
800  
801  
802  
803  
804  
805  
806  
807  
808  
809  
810  
811  
812  
813  
814  
815  
816  
817  
818  
819  
820  
821  
822  
823  
824  
825  
826  
827  
828  
829  
830  
831  
832  
833  
834  
835  
836  
837  
838  
839  
840  
841  
842  
843  
844  
845  
846  
847  
848  
849  
850  
851  
852  
853  
854  
855  
856  
857  
858  
859  
860  
861  
862  
863  
864  
865  
866  
867  
868  
869  
870  
871  
872  
873  
874  
875  
876  
877  
878  
879  
880  
881  
882  
883  
884  
885  
886  
887  
888  
889  
890  
891  
892  
893  
894  
895  
896  
897  
898  
899  
900  
901  
902  
903  
904  
905  
906  
907  
908  
909  
910  
911  
912  
913  
914  
915  
916  
917  
918  
919  
920  
921  
922  
923  
924  
925  
926  
927  
928  
929  
930  
931  
932  
933  
934  
935  
936  
937  
938  
939  
940  
941  
942  
943  
944  
945  
946  
947  
948  
949  
950  
951  
952  
953  
954  
955  
956  
957  
958  
959  
960  
961  
962  
963  
964  
965  
966  
967  
968  
969  
970  
971  
972  
973  
974  
975  
976  
977  
978  
979  
980  
981  
982  
983  
984  
985  
986  
987  
988  
989  
990  
991  
992  
993  
994  
995  
996  
997  
998  
999  
1000

1  
2  
3  
4  
5  
6  
7  
8  
9  
10  
11  
12  
13  
14  
15  
16  
17  
18  
19  
20  
21  
22  
23  
24  
25  
26  
27  
28  
29  
30  
31  
32  
33  
34  
35  
36  
37  
38  
39  
40  
41  
42  
43  
44  
45  
46  
47  
48  
49  
50  
51  
52  
53  
54  
55  
56  
57  
58  
59  
60

accounting for nearly 60%. (See **Table 1**) In 2018, all deaths causes have been divided into preventable diseases and unpreventable diseases to analyses the proportion. The proportion of preventable diseases reached 73.9%. Moreover, the top three diseases at the national level were preterm birth, intrapartum complications, and congenital malformations. (See **Figure 2A**)

Table 1. Leading causes of death in neonates in China from 2014 to 2018

| Causes of death            | Cause-specific mortality (per 100,000 livebirths) |       |       |       |       |                                 |         | Proportion (%) |      |      |      |      |
|----------------------------|---------------------------------------------------|-------|-------|-------|-------|---------------------------------|---------|----------------|------|------|------|------|
|                            | 2014                                              | 2015  | 2016  | 2017  | 2018  | Average annual decline rate (%) | P value | 2014           | 2015 | 2016 | 2017 | 2018 |
|                            |                                                   |       |       |       |       |                                 |         |                |      |      |      |      |
| National wide              |                                                   |       |       |       |       |                                 |         |                |      |      |      |      |
| Preterm birth              | 170.7                                             | 167.2 | 139.8 | 144.4 | 106.6 | 9.7 (7.4, 11.9)                 | <0.001  | 29.1           | 30.8 | 28.7 | 32.2 | 27.3 |
|                            |                                                   |       |       |       |       |                                 |         |                |      |      |      |      |
| Intrapartum complications  | 141.7                                             | 138.5 | 103.9 | 92.5  | 84.6  | 13.5 (11.0, 15.9)               | <0.001  | 24.2           | 25.5 | 21.4 | 20.6 | 21.7 |
|                            |                                                   |       |       |       |       |                                 |         |                |      |      |      |      |
| Pneumonia                  | 66.1                                              | 46.7  | 55.7  | 49.1  | 35.0  | 11.0 (7.1, 14.7)                | <0.001  | 11.3           | 8.6  | 11.4 | 11.1 | 9.9  |
| Diarrhea                   | 2.2                                               | 2.8   | 1.4   | 0.2   | 1.7   | 20.1 (-2.0, 37.4)               | >0.05   | 0.4            | 0.5  | 0.3  | 0    | 0.4  |
| Tetanus                    | 0.8                                               | 0     | 0     | 0     | 0     | N/A                             | <0.05   | 0.1            | 0    | 0    | 0    | 0    |
| HIV                        | 0                                                 | 0     | 0     | 0     | 0     | N/A                             |         | 0              | 0    | 0    | 0    | 0    |
| Neonatal sepsis/meningitis | 14.5                                              | 14.3  | 19.3  | 15    | 19.6  | -6.5 (-14.7, 1.2)               | >0.05   | 2.5            | 2.6  | 4    | 3.3  | 5    |
| Other infectious diseases  | 1.8                                               | 1.1   | 1.4   | 0.9   | 0     | 33.1 (7.9, 51.4)                | <0.05   | 0.3            | 0.2  | 0.3  | 0.2  | 0    |
| Congenital malformations   | 101.7                                             | 82.3  | 91.9  | 82.8  | 78.5  | 5.1 (2.0, 8.1)                  | <0.01   | 17.4           | 15.2 | 18.9 | 18.5 | 20.2 |
| Other diseases             | 86.1                                              | 90    | 73    | 63.4  | 63.8  | 9.2 (5.9, 12.3)                 | <0.001  | 14.7           | 16.6 | 15   | 14.2 | 16.4 |
| Urban area                 |                                                   |       |       |       |       |                                 |         |                |      |      |      |      |
| Preterm birth              | 111.2                                             | 92.9  | 74.5  | 84.3  | 63.3  | 11.4 (7.1, 15.5)                | <0.001  | 31.4           | 28.6 | 25.5 | 31.8 | 28.8 |

|                            |       |       |       |       |       |                    |        |      |      |      |      |      |
|----------------------------|-------|-------|-------|-------|-------|--------------------|--------|------|------|------|------|------|
| Intrapartum complications  | 92    | 80.2  | 63.6  | 61.4  | 41.2  | 16.4 (11.8, 20.7)  | <0.001 | 25.9 | 24.6 | 21.8 | 23.2 | 18.7 |
| Pneumonia                  | 28.8  | 26.1  | 34.9  | 22.9  | 13.5  | 12.4 (4.5, 19.7)   | <0.01  | 8.1  | 8    | 12   | 8.6  | 6.1  |
| Diarrhea                   | 0.6   | 0.7   | 0     | 0.5   | 0.6   | 2.7 (-96.6, 51.8)  | >0.05  | 0.2  | 0.2  | 0    | 0.2  | 0.3  |
| Tetanus                    | 0     | 0     | 0     | 0     | 0     | N/A                | N/A    | 0    | 0    | 0    | 0    | 0    |
| HIV                        | 0     | 0     | 0     | 0     | 0     | N/A                | N/A    | 0    | 0    | 0    | 0    | 0    |
| Neonatal sepsis/meningitis | 10.2  | 12.7  | 16.6  | 17.5  | 20.9  | 2.7 (-96.6, 51.8)  | <0.01  | 2.9  | 3.9  | 5.7  | 6.6  | 9.5  |
| Other infectious diseases  | 1.9   | 2     | 1.7   | 1.5   | 0     | 25.2 (-7.7, 48.1)  | >0.05  | 0.5  | 0.6  | 0.6  | 0.5  | 0    |
| Congenital malformations   | 72.9  | 64.2  | 57.3  | 46.3  | 41.2  | 13.6 (8.4, 18.5)   | <0.001 | 20.5 | 19.7 | 19.6 | 17.5 | 18.7 |
| Other diseases             | 37.1  | 46.8  | 43.5  | 30.7  | 39.3  | 3.2 (-3.7, 9.7)    | >0.05  | 10.5 | 14.4 | 14.9 | 11.6 | 17.9 |
| Rural area                 |       |       |       |       |       |                    |        |      |      |      |      |      |
| Preterm birth              | 197.2 | 200.3 | 168.9 | 171.3 | 125.9 | 9.2 (6.3, 12.1)    | <0.001 | 28.6 | 31.3 | 29.5 | 32.3 | 27   |
| Intrapartum complications  | 163.8 | 164.5 | 121.9 | 106.5 | 104   | 12.8 (9.5, 15.9)   | <0.001 | 23.8 | 25.7 | 21.3 | 20.1 | 22.3 |
| Pneumonia                  | 82.8  | 55.9  | 64.9  | 60.8  | 44.7  | 10.8 (5.9, 15.5)   | <0.001 | 12   | 8.7  | 11.3 | 11.5 | 9.6  |
| Diarrhea                   | 2.9   | 3.8   | 2     | 0     | 2.2   | 25.5 (-0.3, 44.6)  | <0.05  | 0.4  | 0.6  | 0.3  | 0    | 0.5  |
| Tetanus                    | 1.2   | 0     | 0     | 0     | 0     | N/A                | <0.05  | 0.2  | 0    | 0    | 0    | 0    |
| HIV                        | 0     | 0     | 0     | 0     | 0     | N/A                | N/A    | 0    | 0    | 0    | 0    | 0    |
| Neonatal sepsis/meningitis | 16.4  | 15.1  | 20.5  | 13.9  | 19    | -2.3 (-13.2, 7.7)  | >0.05  | 2.4  | 2.4  | 3.6  | 2.6  | 4.1  |
| Other infectious diseases  | 1.8   | 0.6   | 1.3   | 0.7   | 0     | 29.7 (-13.7, 56.6) | >0.05  | 0.3  | 0.1  | 0.2  | 0.1  | 0    |
| Congenital malformations   | 114.5 | 90.4  | 107.3 | 99.2  | 95.2  | 3.0 (-1.2, 6.9)    | >0.05  | 16.6 | 14.1 | 18.7 | 18.7 | 20.4 |
| Other diseases             | 108   | 109.3 | 86.1  | 78    | 74.7  | 10.3 (6.3, 14.2)   | <0.001 | 15.7 | 17.1 | 15   | 14.7 | 16.1 |

The death cause distribution and AADR were also significantly different among regions.

In urban areas, preterm birth, intrapartum complication, and congenital anomalies also accounting the largest proportion of all deaths cause from 2014 to 2018. Moreover, the AADR of preterm birth, intrapartum complications, pneumonia, and congenital malformations in urban areas were all larger than that of the national level. In rural areas, the mortality rate of preterm birth, intrapartum complication, and congenital anomalies significantly decreased. Additionally, the NMR of diarrhea have sharply decreased, with AADR was 25.5% ( $p<0.001$ ). (See **Table 1**)

In contrast, the urban-rural gap still existed. The contribution of tetanus among neonates in urban areas remains zero during the study period, while the rate in rural areas has eliminated until 2015. (See Table 1) In the disease proportion aspect, the proportion of intrapartum complications and pneumonia in rural areas significantly higher than that of urban areas. (See Figure 2B&C) According to the data analysis, causes of neonatal death varied between urban and rural areas ( $P<0.05$ ), but the correlation between neonatal mortality and whether the newborn lived in urban or rural areas was weak (Cramer's  $V=0.129$ ).

### *3. Neonate Diagnosis Facilities Level in China between 2014 and 2018*

The children's diagnosis facilities level has also be included in surveillance. Nationwide, from 2014 to 2018, the proportion of neonate diagnosis at the provincial (or municipal) level health facilities has significantly increased, and the proportion of the district (or

1  
2  
3  
4  
5  
6  
7  
8  
9  
10  
11  
12  
13  
14  
15  
16  
17  
18  
19  
20  
21  
22  
23  
24  
25  
26  
27  
28  
29  
30  
31  
32  
33  
34  
35  
36  
37  
38  
39  
40  
41  
42  
43  
44  
45  
46  
47  
48  
49  
50  
51  
52  
53  
54  
55  
56  
57  
58  
59  
60

county) level has decreased. Moreover, the proportion of township level and village level have both fluctuating declined during this period. In 2018, the proportion of neonate who has not to seek any medical care has minimized, which declined to 3.9% in 2018. (See **Figure 3**)

In an urban aspect, from 2014 to 2018, the majority of children (accounted for over 80%) in urban areas have been diagnosed at provincial (or municipal) level medical facilities. The proportion of the district (or county) level and township -level both have a slight rise between 2014 and 2018. As a result, the percentage of children who have not to seek medical has declined, with 1.9% in 2014 and 1.1% in 2018. (See **Figure 3**)

On the contract, the diagnosis contribution figure of rural areas was different. Although the proportion of provincial (or municipal) level have shown growth trend from 2014 to 2018, the proportion in rural areas have only half of that in urban areas. Moreover, the proportion of street-level diagnoses in the urban area is reduced to 1.4% in 2018, while this proportion in rural areas fluctuated and remained at 3.7% in the same year. Another significant contributor is the proportion of children who have not sought medical care. The proportion of neonate who has not to seek medical care has decreased, and still, 5.5% of children have not sought any medical advice. (See **Figure 3**)

## Discussion

Globally, there were 5.3 million deaths occurred on children under 5 in 2018, 47% of them died during their first month of life. The vast majority of neonatal deaths occur in low - and middle-income countries. Approximately 73,000 neonates died in China in 2018, accounting for about 3.0% of the total newborn deaths worldwide, ranking sixth in the world<sup>[12]</sup>. Moreover, the global decline in neonatal mortality rate (NMR) has been slower than the decline in the under-five mortality rate (U5MR)<sup>[6]</sup>. Global U5MR declined from 93 per 1,000 live births in 1990 to 39 per 1,000 live births in 2018, while that of NMR only declined from 37 per 1,000 live births to 18 per 1,000 live births during the same time period. Additionally, a great many studies have shown that neonatal deaths amounting a large proportion of total mortality of children under 5<sup>[13-15]</sup>. Furthermore, SDGs (Sustainable Development Goals) have targeted specifically for reducing neonatal mortality and eliminating preventable child deaths in 2015<sup>[1]</sup>.

The results of this study show that the NMR in urban and rural areas of China have decreased significantly between 2014 and 2018. According to the NMR data from World Bank in 2018<sup>[14]</sup>, although Chinese NMR (3.9 deaths per 1000 live births in 2018) is at a low level in developing countries (such as the NMR in Brazil was 8.1 deaths per 1000 live births, and Thailand was 5.0 deaths per 1000 live births), it still lags behind that in

developed countries (such as the NMR in Australia was 2.3 deaths per 1000 live births, and Germany was 2.2 deaths per 1000 live births). In order to further shorten the gap with developed countries, there is still room for improvement in neonatal deaths in China. In addition, there were significant differences in NMR between urban and rural areas, which were consistent with significant differences in NMR between countries and regions globally<sup>[16,17]</sup>.

From 2014 to 2018, Chinese NMR continued to decline, and it was dropped quickly. This is closely related to the rapid growth of China's economy<sup>[18]</sup>, the continuous improvement of transportation, and the improvement of the educational level of women at reproductive age<sup>[19]</sup>. Moreover, it also benefits from the improvement of medical treatment at all levels of health facilities, and all levels of government attached great importance to strengthen the construction of the pediatric institution, raise pediatricians' payment, and continue to implement neonatal asphyxia recovery training program<sup>[20]</sup>. As a result, neonatal deaths from pneumonia and infectious diseases, intrapartum complications, and premature delivery were significantly reduced.

China has implemented the Safe Maternal Initiative and the National Program to Reduce Maternal Mortality and Eliminate Tetanus, China has officially eliminated neonatal tetanus in 2012<sup>[21]</sup>, and from 2015 to 2018, the NMR of neonatal tetanus remained 0. Moreover,

through the success of the Prevention of Mother-to-child Transmission of HIV, Syphilis, and Hepatitis B Program, the HIV/AIDS mortality rate has also been 0 from 2014 to 2018<sup>[22,23]</sup>. In 2018 the national neonatal mortality, although already less than 12 deaths per 1000 live births, but the preventable deaths still accounted for 73.9%. Among those preventable diseases, mainly pneumonia, intrapartum complication, premature birth. Among these diseases, the proportion of preterm birth was highest in both nationwide, urban areas, and rural areas. In the recent two decades, the prevalence of preterm birth has significantly increased<sup>[9]</sup>, especially after the Two-child Policy<sup>[24]</sup> was implemented In China. The mortality rate among preterm birth infants was apparently higher than the full-term infant, and the risk of mortality increases proportionally with decreasing gestational age<sup>[25]</sup>. Furthermore, with the widespread development of assisted reproductive technique (ART), the incidence of monozygotic twins has increased significantly<sup>[26]</sup>. The risk of premature birth is significantly higher in ART infants than in infants conceived naturally<sup>[27]</sup>, and the NMR of twins is several times higher than that of singletons<sup>[28]</sup>.

Addressing the issue of preterm birth may require different priorities in rural and urban areas. Because of the good management of many curable neonatal complications (such as pneumonia), the proportion of preterm birth in urban areas is obviously larger than that of rural areas<sup>[29]</sup>. Hence, for urban areas, it is suggested that urban areas need to pay more attention to the prevention of the death of premature infants less than 32 weeks age. For

rural areas, the local government needs to focus on the prevention of premature infants at 32-36 weeks and continue to invest in medical services to improve medical services accessibility for women and children in rural areas.

In addition, the neonatal mortality rate of preterm birth, intrapartum complication, and pneumonia in rural areas were over doubled than urban areas. Hence, the government needs to implement the interventions in preterm birth, intrapartum complications, and root, especially in rural areas.

For neonates, surviving from preterm birth, intrapartum complication and pneumonia are close linking to accessibility to health care, local hospitals' obstetrics and neonates departments' treatment level, and rescue skills<sup>[30,31]</sup>. Therefore, the issue can be addressed from the following four aspects.

Firstly, the local governments need to strengthen the construction of RNTN (Regional Neonatal Transport Network), carry out the transport plan according to the Guidelines for the Construction and Management of Critical Neonatal Treatment Center<sup>[32]</sup>, and ensure the applying of professional medical staff and newborn rescue equipment for neonatal transport. Secondly, one study in Japan has pointed out that the medical care resources

(including Neonatal Intensive Care Unit (NICU), midwives, emergency physicians, and emergency medical care centers) would impact on the NMR decline<sup>[33]</sup>. Therefore, the local governments may base on the Administration guide (proposal) of the Neonatal Physician Branch of the Chinese Physician Association<sup>[34]</sup> to grading neonatal wards, and establishing NICU after analyses local medical establishment plan and newborn medical treatment needs. Thirdly, local health departments can regularly organize multi-level, especially provincial, prefecture-level and district-level) newborn health training programs. In rural areas, with the policies support of the New Rural Construction and the Targeted Poverty Alleviation<sup>[35,36]</sup>, the improved rural transport and higher incomes have prompted the enhanced accessibility of health services in rural areas, and the proportion of rural children receiving medical treatment in provincial and municipal hospitals has significantly increased. The proportion of rural neonate diagnosis at the provincial (or municipal) level health facilities has significantly increased from 39.2% to 47.6% from 2014 to 2018. Set training objectives for medical staff in health facilities of different levels, and strengthen the newborn treatment technology in each level of health facilities. Especially for the health workers in rural areas, the newborn resuscitation training needs to be specifically strengthened. Fourthly, the local communities can strengthen publicity to encourage caregivers to take children to attend to the health facilities for treatment. As for poor households, local governments can set up special subsidies for them to reduce the economic cost of medical treatment.

1

2

3

4

5

6

7 **Conclusion**

8

9

10 With the joint efforts of the economic development and the governmental policies and

11 strategies, the neonatal mortality rate of China has significantly decreased from 2014 to

12

13 2018. The gap between neonatal mortality and cause-of-death distribution still existed

14

15 between urban and rural areas. The goal of government interventions should be to narrow

16

17 the urban-rural gap, reduce the health inequality of neonates, and further take targeted

18

19 measures to eliminate the preventable death of neonates, especially premature births, so as

20

21 to achieve the SDGs goal.

22

23

24

25

26

27

28

29

30

31

32 **Acknowledgments**

33

34

35 We thank the institutions and staff of the National Maternal and Child Health Surveillance

36

37 System for data collection, data provided, and case investigation.

38

39

40

41

42

43 **Funding**

44

45 This study was supported by the Ministry of Health, China (grants QT2003-009 and

46

47 05wsb-02) and UNICEF (grant YH601-11-1141).

48

49

50

51

52

53 **Author contributions**

54

55

56 Data analysis: Yuxi Liu

57

58

59

60

Methodology: Hanmin Liu and Yanping Wang, Leni Kang

Data curation: Jun Zhu, Juan Liang, Lei Miao, Xiaoqiong Qiu, Weipeng Xia

Software: Chunhua He, Leni Kang and Qi Li

Writing – original draft: Yuxi Liu

Writing – review, and editing: Yuxi Liu, Hanmin Liu, and Yanping Wang

### Conflicts of interest

The authors declare no conflicts of interest.

### References

- [1] UN (2015). Sustainable Development Goals.  
<https://sustainabledevelopment.un.org/?menu=1300>. Accessed 12th Mar 2020.
- [2] National Working Committee on Children and Women under State Council.  
National Program for Women and Child Development.  
[http://www.nwccw.gov.cn/node\\_2427.htm](http://www.nwccw.gov.cn/node_2427.htm). Accessed 12th Mar 2020.
- [3] UN (2000). Millennium Development Goal.  
<http://www.un.org/zh/millenniumgoals/getinvolved.shtml>. Accessed 12th Mar 2020.
- [4] Wang Y, Li X, Zhou M, et al. Under-5 mortality in 2851 Chinese counties, 1996-2012: a subnational assessment of achieving MDG 4 goals in China. *Lancet*.

2016;387(10015):273-283.

[5] National Bureau of Statistics of China (2016). China statistical yearbook 2016. <http://www.stats.gov.cn/tjsj/ndsj/2016/indexch.htm>. Accessed 12th Mar 2020.

[6] Ministry of Foreign Affairs of China & UN China (2015). Report on China's Implementation of the Millennium Development Goals (2000-2015). [http://cn.chinagate.cn/reports/2015-07/28/content\\_36164105.htm](http://cn.chinagate.cn/reports/2015-07/28/content_36164105.htm). Accessed 12th Mar 2020.

[7] Kuruvilla S, Schweitzer J, Bishai D, et al. Success factors for reducing maternal and child mortality. Bull World Health Organ. 2014;92(7):533-544b.

[8] The development of China's Health Care and inhabitant's health status (2018) China Public Health Statistical Yearbook 2018. Peking Union Medical College Publishing House.

[9] Lu R, Li X, Guo S, et al. Neonatal mortality in the urban and rural China between 1996 and 2013: a retrospective study. Pediatr Res. 2016;79(5):689-696.

[10] Nichols EK, Byass P, Chandramohan D, et al. The WHO 2016 verbal autopsy instrument: An international standard suitable for automated analysis by InterVA, InSilicoVA, and Tariff 2.0. PLoS Med. 2018;15(1):e1002486.

[11] He C, Liu L, Chu Y, et al. National and subnational all-cause and cause-specific child mortality in China, 1996-2015: a systematic analysis with implications for the Sustainable Development Goals. Lancet Glob Health. 2017;5(2):e186-e197.

[12] WHO, UNICEF, UN & World Bank Group (2019). Levels & Trends in Child

- Mortality-Report 2019.
- [13] Zhang. CL. (2015) Analysis of surveillance results of 4074 children under 5 years old. Maternal and Child Health Care of China.30:5095-5098.
- [14] WHO (2019). Newborns: reducing mortality. <https://www.who.int/news-room/fact-sheets/detail/newborns-reducing-mortality>. Accessed 12th Mar 2020.
- [15] Health Ministry of China. Health Statistical Yearbook of China, 1st edn. Beijing, China: Peking Union Medical College Press, 2013:201.
- [16] Yaya S, Uthman OA, Okonofua F, et al. Decomposing the rural-urban gap in the factors of under-five mortality in sub-Saharan Africa? Evidence from 35 countries. BMC Public Health. 2019;19(1):616.
- [17] Saikia, N., Singh, A., Jasilionis, D., et al. Explaining the rural-urban gap in infant mortality in India. Demographic Research, 29(18), 473-506.
- [18] The World Bank Group. GDP (current US\$) – China. <https://data.worldbank.org/indicator/NY.GDP.MKTP.CD?end=2018&locations=CN&start=1960>. Accessed 2nd May 2020.
- [19] National Bureau of Statistics of China. A series of reports on the economic and social achievements of the 70th anniversary of the founding of the People's Republic of China. [http://www.stats.gov.cn/tjsj/zxfb/201907/t20190701\\_1673407.html](http://www.stats.gov.cn/tjsj/zxfb/201907/t20190701_1673407.html). Accessed 3rd May 2020.
- [20] National health commission, National Development, and reform commission, the

Ministry of Education, the Ministry of Finance, the Ministry of human resources and social security & National Administration of Traditional Chinese Medicine (NATCM) (2016). Circular on the issuance of opinions on strengthening the reform and development of children's medical and health services.

[http://www.mohrss.gov.cn/SYrlzyhshbzb/shehuibaozhang/zcwj/yiliao/201606/t20160601\\_241098.html](http://www.mohrss.gov.cn/SYrlzyhshbzb/shehuibaozhang/zcwj/yiliao/201606/t20160601_241098.html). Accessed 2nd May 2020.

[21] UNICEF (2012). Maternal and neonatal tetanus eliminated in China.

<https://www.unicef.cn/en/press-releases/maternal-and-neonatal-tetanus-eliminated-china>. Accessed 2nd May 2020.

[22] Wang AL, Qiao YP, Wang LH, et al. Integrated prevention of mother-to-child transmission for human immunodeficiency virus, syphilis and hepatitis B virus in China. Bull World Health Organ. 2015;93(1):52-56.

[23] China CDC (2011) . Prevention of mother-to-child transmission of HIV, syphilis and hepatitis b (2011-2013).

[http://www.chinacdc.cn/gwswww/fyzx/201107/t20110704\\_48397.html](http://www.chinacdc.cn/gwswww/fyzx/201107/t20110704_48397.html). Accessed 2nd May 2020.

[24] Institute of party history and literature of the CPC central committee (2019). Memorabilia of the People's Republic of China (October 1949 -- September 2019)

<http://cpc.people.com.cn/n1/2019/0928/c419242-31378078.html>. Accessed 3rd May 2020.

[25] Boghossian NS, Geraci M, Edwards EM, et al. Morbidity and Mortality in Small

- for Gestational Age Infants at 22 to 29 Weeks' Gestation. *Pediatrics*. 2018;141(2).
- [26] Gee RE, Dickey RP, Xiong X, et al. Impact of monozygotic twinning on multiple births resulting from in vitro fertilization in the United States, 2006-2010. *Am J Obstet Gynecol*. 2014;210(5):468.e461-466.
- [27] He L LY, Li Y, et al. Analysis of perinatal and neonatal outcomes in 1 237 pregnancies through in vitro fertilization. *Journal of Third Military Medical University*, 2016, 38(23): 2516-2521.
- [28] Imaizumi Y, Hayakawa K. Infant mortality among singletons and twins in Japan during 1999-2008 on the basis of risk factors. *Twin Res Hum Genet*. 2013;16(2):639-644.
- [29] Liang J, Mao M, Dai L, et al. Neonatal mortality due to preterm birth at 28-36 weeks' gestation in China, 2003-2008. *Paediatr Perinat Epidemiol*. 2011;25(6):593-600.
- [30] World Health Organization, Dept. of Reproductive Health and Research; United Nations Population Fund; UNICEF (2003). *Managing newborn problems: A guide for doctors, nurses and midwives*. In.
- [31] Bryce J, Boschi-Pinto C, Shibuya K, et al. WHO estimates of the causes of death in children. *Lancet*. 2005;365(9465):1147-1152.
- [32] The National Health Commission of China (2017). *Guidelines for the Construction and Management of Critical Neonatal Treatment Center*.  
<http://www.nhc.gov.cn/fys/s3581/201801/1048948966a44067974a44187c6a8912>.

[shtml](#). Accessed 28th Apr 2020.

[33] Matsumoto Y, Nakai A, Nishijima Y, et al. Absence of neonatal intensive care units in secondary medical care zones is an independent risk factor of high perinatal mortality in Japan. *J Obstet Gynaecol Res*. 2016;42(10):1304-1309.

[34] Neonatal Physician Branch of Chinese Physician Association (2013). Guidelines for graded construction and management of neonatal wards in China (proposal). *Chin J Appl Clin Pediatr*, February, 28(3). 231-239. In.

[35] Office of the central leading group for financial and economic affairs of China (2006). Five mechanisms of the new socialist countryside. <http://finance.people.com.cn/GB/1037/4132493.html>. Accessed 2nd May 2020.

[36] Zhou Y, Guo, Y., Liu, Y, et al. Targeted poverty alleviation and land policy innovation: Some practice and policy implications from China. *Land Use Policy*, 74(74), 53-65.

Figure 1. The national and urban-rural neonatal mortality rates (per 1,000 live births) in China between 2014 and 2018

Figure 2A. The proportion of cause-specific neonatal diseases of China in 2018

Figure 2B. The proportion of cause-specific neonatal diseases of urban China in 2018

Figure 2C. The proportion of cause-specific neonatal diseases of rural China in 2018

Figure 3. The proportion of neonatal diagnose level in China from 2014 to 2018

Figure 1. The national and urban–rural neonatal mortality rates (per 1,000 live births) in China between 2014 and 2018

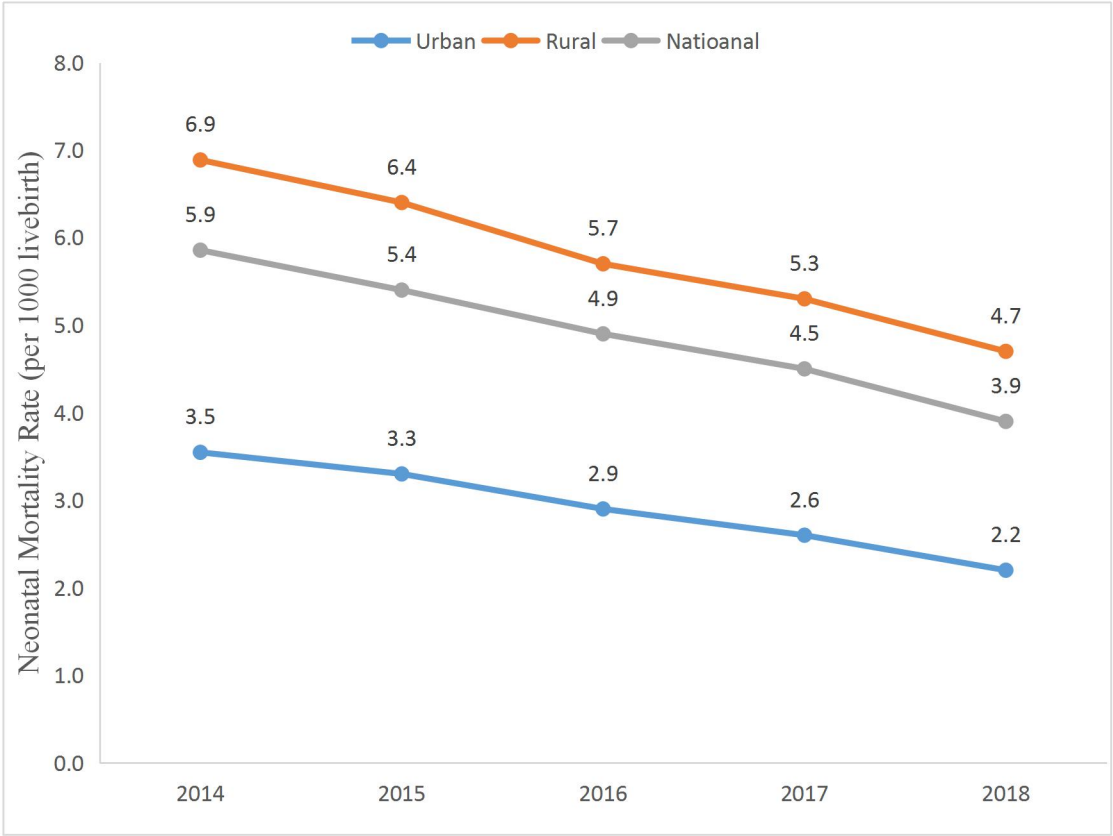

Figure 2A. The proportion of cause-specific neonatal diseases of China in 2018

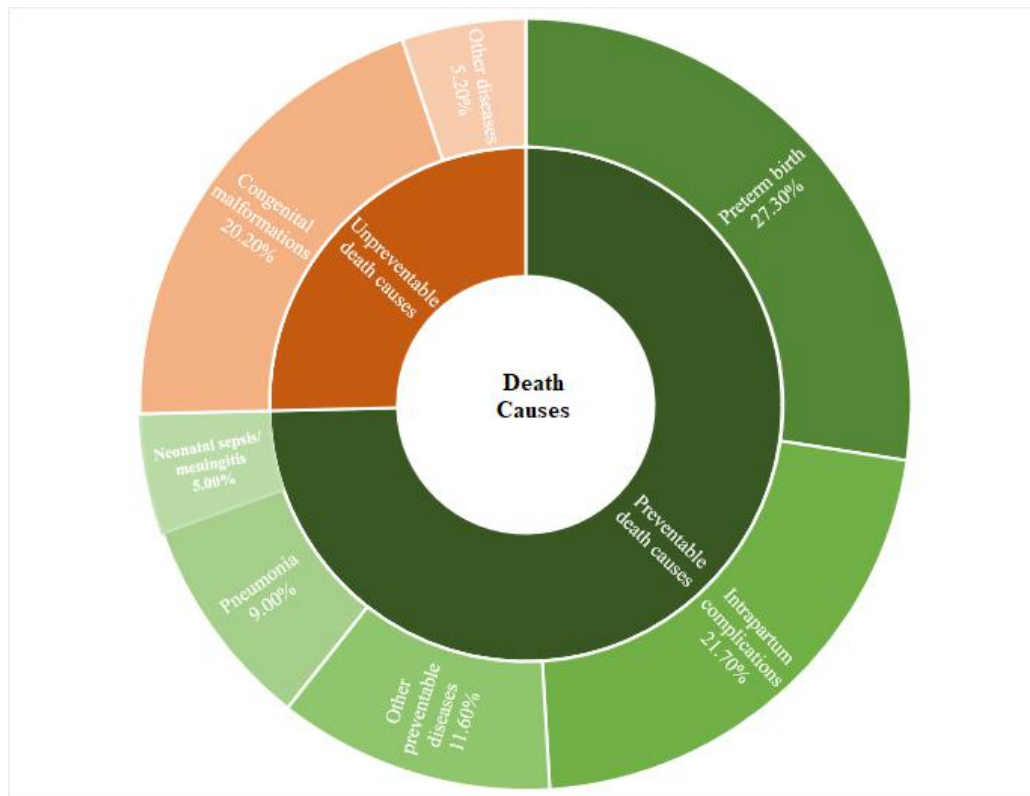

Figure 2B. The proportion of cause-specific neonatal diseases of urban China in 2018

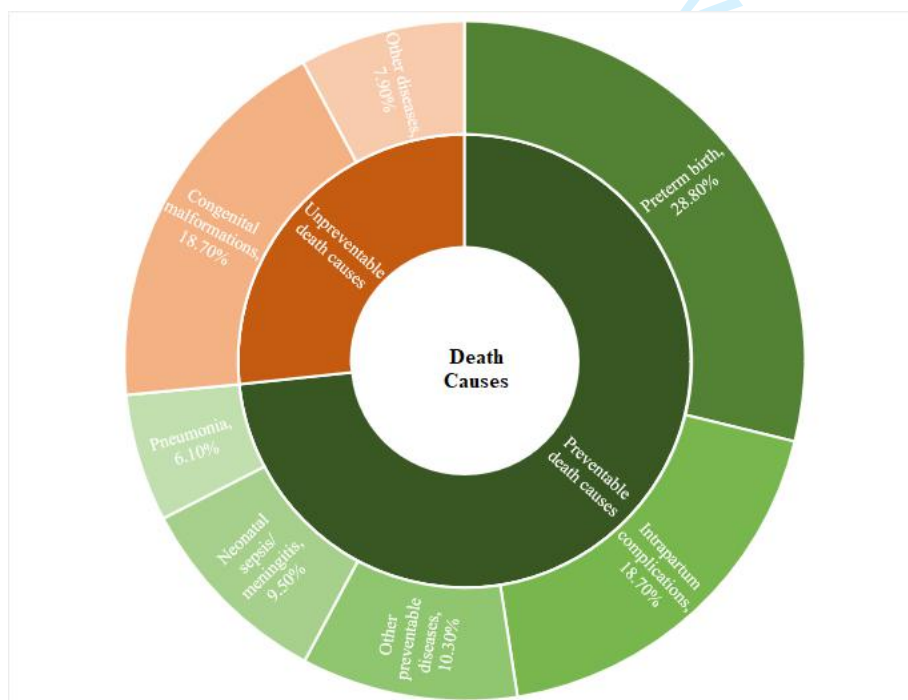

Figure 2C. The proportion of cause-specific neonatal diseases of rural China in 2018

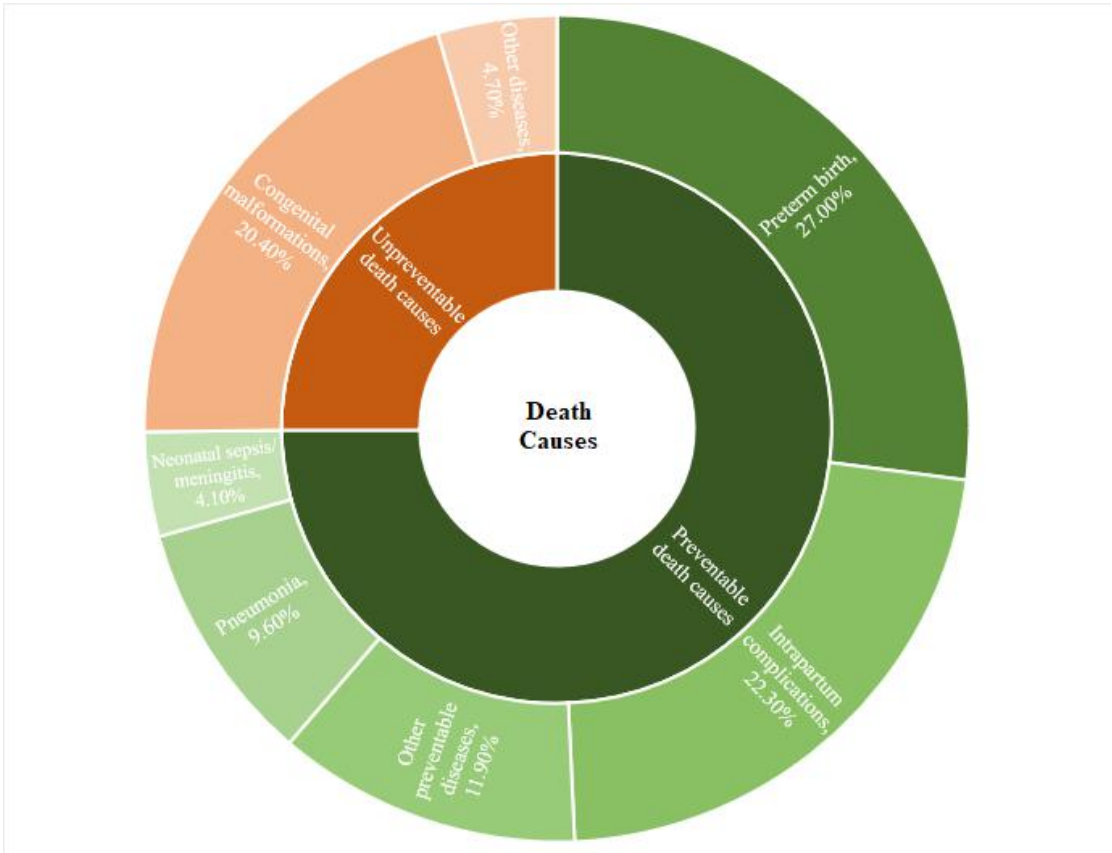

Figure 3. The proportion of neonatal diagnose level in China from 2014 to 2018

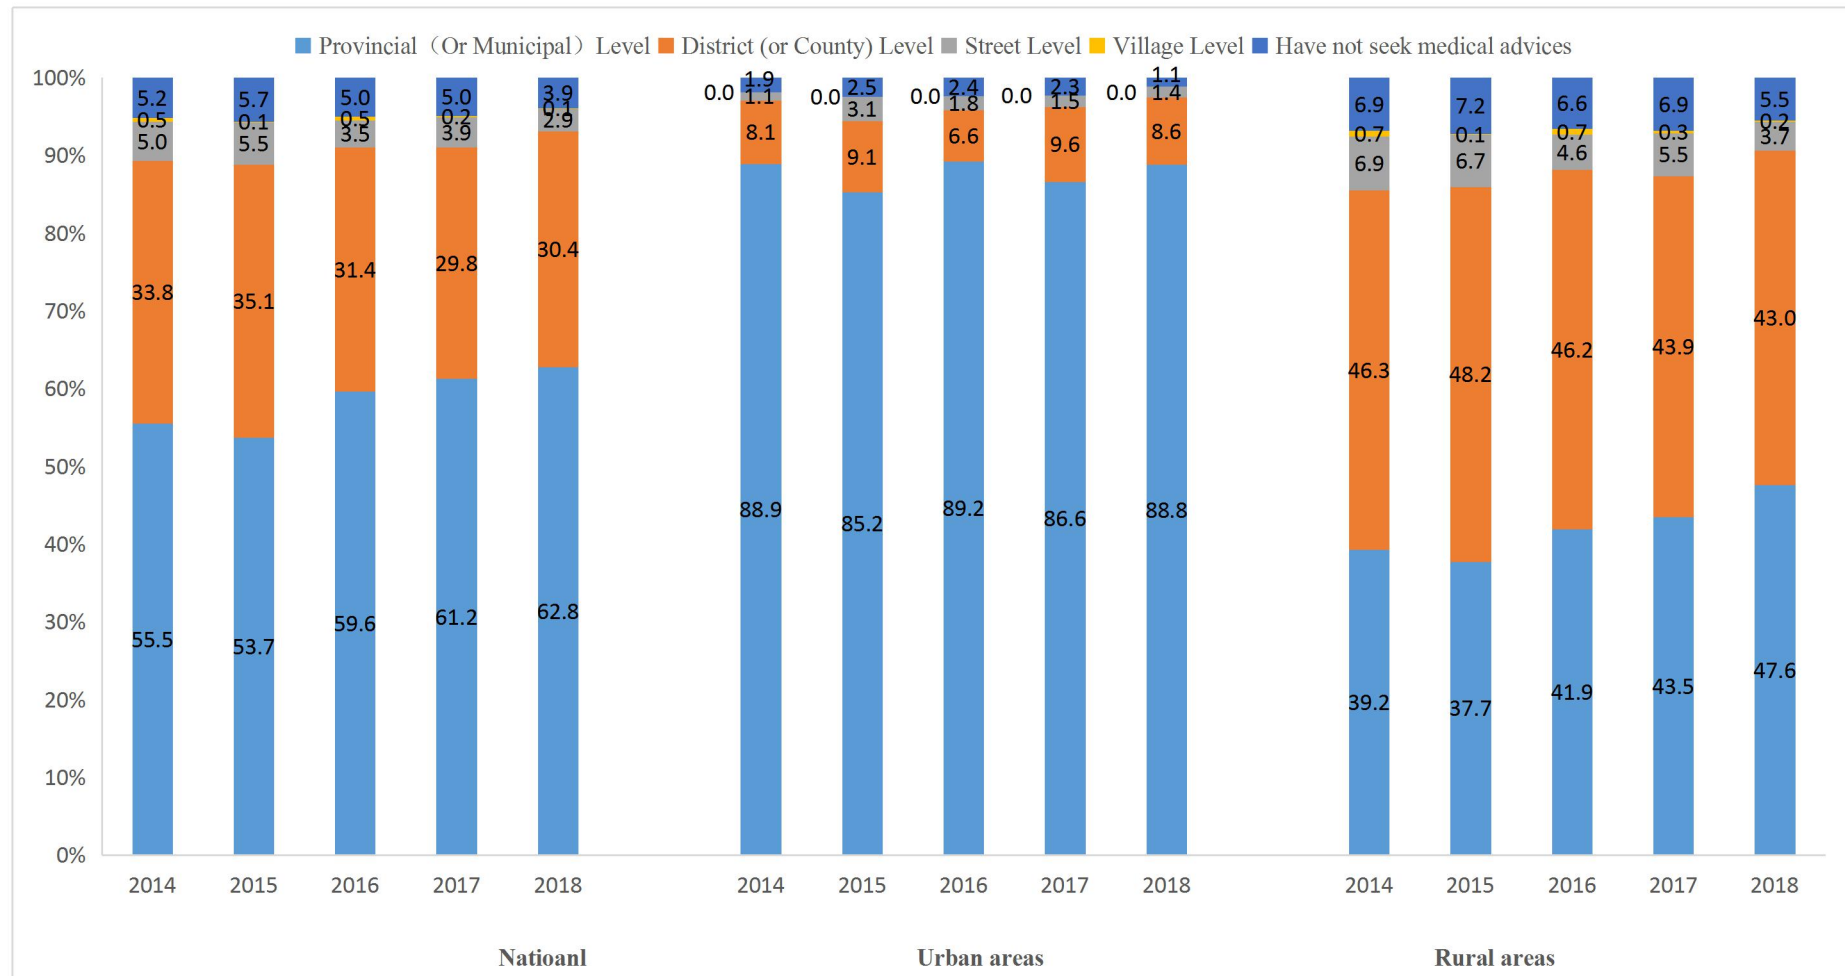

STROBE Statement—checklist of items that should be included in reports of observational studies

|                      | Item No | Recommendation                                                                                                                                                                                                                                                                                                                                                                            | Page No | Relevant text from manuscript                                                                                                                                                                                                                                                                                                                                                                                                                                                                                                                                                                                                                                                                              |
|----------------------|---------|-------------------------------------------------------------------------------------------------------------------------------------------------------------------------------------------------------------------------------------------------------------------------------------------------------------------------------------------------------------------------------------------|---------|------------------------------------------------------------------------------------------------------------------------------------------------------------------------------------------------------------------------------------------------------------------------------------------------------------------------------------------------------------------------------------------------------------------------------------------------------------------------------------------------------------------------------------------------------------------------------------------------------------------------------------------------------------------------------------------------------------|
| Title and abstract   | 1       | (a) Indicate the study’s design with a commonly used term in the title or the abstract                                                                                                                                                                                                                                                                                                    | 1       | a descriptive study                                                                                                                                                                                                                                                                                                                                                                                                                                                                                                                                                                                                                                                                                        |
|                      |         | (b) Provide in the abstract an informative and balanced summary of what was done and what was found                                                                                                                                                                                                                                                                                       | 3       | The present study estimated the national and urban-rural levels and causes of neonatal deaths in China annually between 2014 and 2018.<br>The Poisson regression model was used to calculate the average annual rate of decline of NMR, cause-of-death mortality, and its 95% confidence interval in the country, urban and rural areas, respectively.<br>The neonatal mortality rate in China has significantly decreased from 2014 to 2018. The gap between neonatal mortality and cause-of-death distribution still existed between urban and rural areas. The further goal of government interventions need to focus on be to narrow the urban-rural gap and reduce the health inequality of neonates. |
| Introduction         |         |                                                                                                                                                                                                                                                                                                                                                                                           |         |                                                                                                                                                                                                                                                                                                                                                                                                                                                                                                                                                                                                                                                                                                            |
| Background/rationale | 2       | Explain the scientific background and rationale for the investigation being reported                                                                                                                                                                                                                                                                                                      | 5       | Paragraphs 1 to 2 in the introduction                                                                                                                                                                                                                                                                                                                                                                                                                                                                                                                                                                                                                                                                      |
| Objectives           | 3       | State specific objectives, including any prespecified hypotheses                                                                                                                                                                                                                                                                                                                          | 5       | Paragraphs 2 in the introduction                                                                                                                                                                                                                                                                                                                                                                                                                                                                                                                                                                                                                                                                           |
| Methods              |         |                                                                                                                                                                                                                                                                                                                                                                                           |         |                                                                                                                                                                                                                                                                                                                                                                                                                                                                                                                                                                                                                                                                                                            |
| Study design         | 4       | Present key elements of study design early in the paper                                                                                                                                                                                                                                                                                                                                   | 6       | The data in this study were extracted from National Maternal and Child Health Surveillance System (NMCHSS). <b>(first paragraph in Study subjects section)</b>                                                                                                                                                                                                                                                                                                                                                                                                                                                                                                                                             |
| Setting              | 5       | Describe the setting, locations, and relevant dates, including periods of recruitment, exposure, follow-up, and data collection                                                                                                                                                                                                                                                           | 6       | Data used in this study were obtained from NMCHSS, a well-established population-based under-5 child death registry system. The 334 surveillance districts covering 124 urban districts and 210 rural districts in 31 provinces, autonomous regions, and municipalities of China. According to the women’s residence, the surveillance sites can be classified into urban areas or rural areas. More details about data collection and quality control have been described elsewhere. <b>(Study subjects section)</b>                                                                                                                                                                                      |
| Participants         | 6       | (a) Cohort study—Give the eligibility criteria, and the sources and methods of selection of participants. Describe methods of follow-up<br>Case-control study—Give the eligibility criteria, and the sources and methods of case ascertainment and control selection. Give the rationale for the choice of cases and controls<br>Cross-sectional study—Give the eligibility criteria, and | 6-7     | After each child died in the surveillance districts, the local village doctor (or community doctor) needs to report to the local township health centers (or community health service centers) within 10 days. Local township health centers (or community health service centers) need to be verified within 7 days after reporting and fill the Child Death Report Card based on the hospital's death diagnosis. The classification of diseases according to the international classification of diseases-10 (ICD-10). <b>(Data collection and quality control section)</b>                                                                                                                              |

|                              |    |                                                                                                                                                                                      |   |                                                                                                                                                                                                                                                                                                            |
|------------------------------|----|--------------------------------------------------------------------------------------------------------------------------------------------------------------------------------------|---|------------------------------------------------------------------------------------------------------------------------------------------------------------------------------------------------------------------------------------------------------------------------------------------------------------|
|                              |    | the sources and methods of selection of participants                                                                                                                                 |   |                                                                                                                                                                                                                                                                                                            |
|                              |    | (b) <i>Cohort study</i> —For matched studies, give matching criteria and number of exposed and unexposed                                                                             |   |                                                                                                                                                                                                                                                                                                            |
|                              |    | <i>Case-control study</i> —For matched studies, give matching criteria and the number of controls per case                                                                           |   |                                                                                                                                                                                                                                                                                                            |
| Variables                    | 7  | Clearly define all outcomes, exposures, predictors, potential confounders, and effect modifiers. Give diagnostic criteria, if applicable                                             | 6 | All neonates of surveillance districts (gestational week $\geq 28$ weeks) who died after delivery, and had one of the four vital signs would be involved in surveillance subject, including heartbeat, breath, umbilical cord pulsation, and voluntary muscle contraction. <b>(Study subjects section)</b> |
| Data sources/<br>measurement | 8* | For each variable of interest, give sources of data and details of methods of assessment (measurement). Describe comparability of assessment methods if there is more than one group | 6 | The data in this study were extracted from National Maternal and Child Health Surveillance System (NMCHSS). <b>(First paragraph in Study subjects section)</b>                                                                                                                                             |
| Bias                         | 9  | Describe any efforts to address potential sources of bias                                                                                                                            | - | -                                                                                                                                                                                                                                                                                                          |
| Study size                   | 10 | Explain how the study size was arrived at                                                                                                                                            | 6 | The data in this study were extracted from National Maternal and Child Health Surveillance System (NMCHSS). <b>(First paragraph in Study subjects section)</b>                                                                                                                                             |
| Quantitative<br>variables    | 11 | Explain how quantitative variables were handled in the analyses. If applicable, describe which groupings were chosen and why                                                         | - | -                                                                                                                                                                                                                                                                                                          |
| Statistical methods          | 12 | (a) Describe all statistical methods, including those used to control for confounding                                                                                                |   |                                                                                                                                                                                                                                                                                                            |
|                              |    | (b) Describe any methods used to examine subgroups and interactions                                                                                                                  | 8 | <b>Statistical analysis section</b>                                                                                                                                                                                                                                                                        |
|                              |    | (c) Explain how missing data were addressed                                                                                                                                          |   |                                                                                                                                                                                                                                                                                                            |
|                              |    | (d) <i>Cohort study</i> —If applicable, explain how loss to follow-up was addressed                                                                                                  |   |                                                                                                                                                                                                                                                                                                            |
|                              |    | <i>Case-control study</i> —If applicable, explain how matching of cases and controls was addressed                                                                                   |   |                                                                                                                                                                                                                                                                                                            |
|                              |    | <i>Cross-sectional study</i> —If applicable, describe analytical methods taking account of sampling strategy                                                                         |   |                                                                                                                                                                                                                                                                                                            |
|                              |    | (e) Describe any sensitivity analyses                                                                                                                                                |   |                                                                                                                                                                                                                                                                                                            |

Continued on next page

**Results**

|              |     |                                                             |    |                                                                                                                                                                           |
|--------------|-----|-------------------------------------------------------------|----|---------------------------------------------------------------------------------------------------------------------------------------------------------------------------|
| Participants | 13* | (a) Report numbers of individuals at each stage of study—eg | 10 | During 2014 to 2018, the NMR of China has steadily decreased from 5.9 deaths per 1000 live births in 2014 to 3.9 deaths per 1000 live births in 2018 ( $p < 0.001$ ), the |
|--------------|-----|-------------------------------------------------------------|----|---------------------------------------------------------------------------------------------------------------------------------------------------------------------------|

|    |                   |                                                                                                                                                                                                                 |       |                                                                                           |
|----|-------------------|-----------------------------------------------------------------------------------------------------------------------------------------------------------------------------------------------------------------|-------|-------------------------------------------------------------------------------------------|
| 1  |                   | numbers potentially eligible, examined for eligibility,                                                                                                                                                         |       | average annual rate of decline was 10.7%. The mortality rate of urban areas decreased     |
| 2  |                   | confirmed eligible, included in the study, completing follow-                                                                                                                                                   |       | from 3.5 deaths per 1000 live births to 2.2 deaths per 1000 live births, with the average |
| 3  |                   | up, and analysed                                                                                                                                                                                                |       | annual rate of decline was 13.0%. In rural areas, the NMR decreased significantly from    |
| 4  |                   |                                                                                                                                                                                                                 |       | 2014 to 2018 (6.9 deaths per 1000 live births to 4.7 deaths per 1000 live births, the     |
| 5  |                   |                                                                                                                                                                                                                 |       | average annual rate of decline was 10.6%, p<0.001). <b>(the first paragraph in The</b>    |
| 6  |                   |                                                                                                                                                                                                                 |       | <b>NMR of China from 2014 to 2018 section)</b>                                            |
| 7  |                   | (b) Give reasons for non-participation at each stage                                                                                                                                                            | -     | -                                                                                         |
| 8  |                   | (c) Consider use of a flow diagram                                                                                                                                                                              | -     | -                                                                                         |
| 9  | Descriptive data  | 14* (a) Give characteristics of study participants (eg demographic, clinical, social) and information on exposures and potential confounders                                                                    | 10    | <b>Results section</b>                                                                    |
| 10 |                   | (b) Indicate number of participants with missing data for each variable of interest                                                                                                                             | -     | -                                                                                         |
| 11 |                   | (c) Cohort study—Summarise follow-up time (eg, average and total amount)                                                                                                                                        | -     | -                                                                                         |
| 12 |                   |                                                                                                                                                                                                                 |       |                                                                                           |
| 13 |                   |                                                                                                                                                                                                                 |       |                                                                                           |
| 14 |                   |                                                                                                                                                                                                                 |       |                                                                                           |
| 15 |                   |                                                                                                                                                                                                                 |       |                                                                                           |
| 16 |                   |                                                                                                                                                                                                                 |       |                                                                                           |
| 17 | Outcome data      | 15* Cohort study—Report numbers of outcome events or summary measures over time                                                                                                                                 |       |                                                                                           |
| 18 |                   | Case-control study—Report numbers in each exposure category, or summary measures of exposure                                                                                                                    |       |                                                                                           |
| 19 |                   | Cross-sectional study—Report numbers of outcome events or summary measures                                                                                                                                      | 10-14 | <b>Results section</b>                                                                    |
| 20 |                   |                                                                                                                                                                                                                 |       |                                                                                           |
| 21 |                   |                                                                                                                                                                                                                 |       |                                                                                           |
| 22 |                   |                                                                                                                                                                                                                 |       |                                                                                           |
| 23 |                   |                                                                                                                                                                                                                 |       |                                                                                           |
| 24 |                   |                                                                                                                                                                                                                 |       |                                                                                           |
| 25 | Main results      | 16 (a) Give unadjusted estimates and, if applicable, confounder-adjusted estimates and their precision (eg, 95% confidence interval). Make clear which confounders were adjusted for and why they were included | 10-14 | <b>Results section</b>                                                                    |
| 26 |                   | (b) Report category boundaries when continuous variables were categorized                                                                                                                                       | -     | -                                                                                         |
| 27 |                   | (c) If relevant, consider translating estimates of relative risk into absolute risk for a meaningful time period                                                                                                | -     | -                                                                                         |
| 28 |                   |                                                                                                                                                                                                                 |       |                                                                                           |
| 29 |                   |                                                                                                                                                                                                                 |       |                                                                                           |
| 30 |                   |                                                                                                                                                                                                                 |       |                                                                                           |
| 31 |                   |                                                                                                                                                                                                                 |       |                                                                                           |
| 32 |                   |                                                                                                                                                                                                                 |       |                                                                                           |
| 33 |                   |                                                                                                                                                                                                                 |       |                                                                                           |
| 34 |                   |                                                                                                                                                                                                                 |       |                                                                                           |
| 35 | Other analyses    | 17 Report other analyses done—eg analyses of subgroups and interactions, and sensitivity analyses                                                                                                               | -     | -                                                                                         |
| 36 |                   |                                                                                                                                                                                                                 |       |                                                                                           |
| 37 |                   |                                                                                                                                                                                                                 |       |                                                                                           |
| 38 | <b>Discussion</b> |                                                                                                                                                                                                                 |       |                                                                                           |
| 39 | Key results       | 18 Summarise key results with reference to study objectives                                                                                                                                                     | 15    | <b>Discussion section</b>                                                                 |
| 40 | Limitations       | 19 Discuss limitations of the study, taking into account sources of                                                                                                                                             | -     | -                                                                                         |
| 41 |                   |                                                                                                                                                                                                                 |       |                                                                                           |
| 42 |                   |                                                                                                                                                                                                                 |       |                                                                                           |
| 43 |                   |                                                                                                                                                                                                                 |       |                                                                                           |
| 44 |                   |                                                                                                                                                                                                                 |       |                                                                                           |
| 45 |                   |                                                                                                                                                                                                                 |       |                                                                                           |
| 46 |                   |                                                                                                                                                                                                                 |       |                                                                                           |

|                          |    |                                                                                                                                                                            |       |                                                                                                                          |
|--------------------------|----|----------------------------------------------------------------------------------------------------------------------------------------------------------------------------|-------|--------------------------------------------------------------------------------------------------------------------------|
|                          |    | potential bias or imprecision. Discuss both direction and magnitude of any potential bias                                                                                  |       |                                                                                                                          |
| Interpretation           | 20 | Give a cautious overall interpretation of results considering objectives, limitations, multiplicity of analyses, results from similar studies, and other relevant evidence | 15-19 | <b>Discussion section</b>                                                                                                |
| Generalisability         | 21 | Discuss the generalisability (external validity) of the study results                                                                                                      | 15-19 | <b>Discussion section</b>                                                                                                |
| <b>Other information</b> |    |                                                                                                                                                                            |       |                                                                                                                          |
| Funding                  | 22 | Give the source of funding and the role of the funders for the present study and, if applicable, for the original study on which the present article is based              | 20    | This study was supported by the Department of Women and Children of the National Health Commission of China, and UNICEF. |

\*Give information separately for cases and controls in case-control studies and, if applicable, for exposed and unexposed groups in cohort and cross-sectional studies.

**Note:** An Explanation and Elaboration article discusses each checklist item and gives methodological background and published examples of transparent reporting. The STROBE checklist is best used in conjunction with this article (freely available on the Web sites of PLoS Medicine at <http://www.plosmedicine.org/>, Annals of Internal Medicine at <http://www.annals.org/>, and Epidemiology at <http://www.epidem.com/>). Information on the STROBE Initiative is available at [www.strobe-statement.org](http://www.strobe-statement.org).

# BMJ Open

## Neonatal mortality and leading causes of deaths: a descriptive study in China, 2014-2018

|                                 |                                                                                                                                                                                                                                                                                                                                                                                                                                                                                                                                                                                                                                                                                                                                                                                                                                                                                                                                                                                                                                                                                                                                                                                                                                                                                                                                                                                                                                                                                                                                                                                                                                                                                         |
|---------------------------------|-----------------------------------------------------------------------------------------------------------------------------------------------------------------------------------------------------------------------------------------------------------------------------------------------------------------------------------------------------------------------------------------------------------------------------------------------------------------------------------------------------------------------------------------------------------------------------------------------------------------------------------------------------------------------------------------------------------------------------------------------------------------------------------------------------------------------------------------------------------------------------------------------------------------------------------------------------------------------------------------------------------------------------------------------------------------------------------------------------------------------------------------------------------------------------------------------------------------------------------------------------------------------------------------------------------------------------------------------------------------------------------------------------------------------------------------------------------------------------------------------------------------------------------------------------------------------------------------------------------------------------------------------------------------------------------------|
| Journal:                        | <i>BMJ Open</i>                                                                                                                                                                                                                                                                                                                                                                                                                                                                                                                                                                                                                                                                                                                                                                                                                                                                                                                                                                                                                                                                                                                                                                                                                                                                                                                                                                                                                                                                                                                                                                                                                                                                         |
| Manuscript ID                   | bmjopen-2020-042654.R1                                                                                                                                                                                                                                                                                                                                                                                                                                                                                                                                                                                                                                                                                                                                                                                                                                                                                                                                                                                                                                                                                                                                                                                                                                                                                                                                                                                                                                                                                                                                                                                                                                                                  |
| Article Type:                   | Original research                                                                                                                                                                                                                                                                                                                                                                                                                                                                                                                                                                                                                                                                                                                                                                                                                                                                                                                                                                                                                                                                                                                                                                                                                                                                                                                                                                                                                                                                                                                                                                                                                                                                       |
| Date Submitted by the Author:   | 30-Dec-2020                                                                                                                                                                                                                                                                                                                                                                                                                                                                                                                                                                                                                                                                                                                                                                                                                                                                                                                                                                                                                                                                                                                                                                                                                                                                                                                                                                                                                                                                                                                                                                                                                                                                             |
| Complete List of Authors:       | Liu, Yuxi; Sichuan University West China Second University Hospital, National Office for Maternal and Child Health Surveillance of China<br>Kang, Leni; Sichuan University West China Second University Hospital, National Office for Maternal and Child Health Surveillance of China<br>He, Chunhua; Sichuan University West China Second University Hospital, National Office for Maternal and Child Health Surveillance of China<br>Miao, Lei; Sichuan University West China Second University Hospital, National Office for Maternal and Child Health Surveillance of China<br>Qiu, Xiaoqiong; Pidun district people's hospital, Chengdu, Sichuan<br>Xia, Weipeng; Second People's Hospital of Zhaotong, Zhaotong, Yunnan, Department of Pediatrics<br>Zhu, Jun; Sichuan University West China Second University Hospital, Key Laboratory of Birth Defects and Related Diseases of Women and Children of the Ministry of Education, West China Second University Hospital, Sichuan University, Chengdu, China; Sichuan University West China Second University Hospital, National Office for Maternal and Child Health Surveillance of China<br>Liang, Juan; Sichuan University West China Second University Hospital, National Office for Maternal and Child Health Surveillance of China<br>Li, Qi; Sichuan University West China Second University Hospital, National Office for Maternal and Child Health Surveillance of China<br>Wang, Yanping; Sichuan University West China Second University Hospital, National Office for Maternal and Child Health Surveillance of China<br>Liu, Min; Sichuan University West China Second University Hospital, Department of Pediatrics |
| <b>Primary Subject Heading</b>: | Public health                                                                                                                                                                                                                                                                                                                                                                                                                                                                                                                                                                                                                                                                                                                                                                                                                                                                                                                                                                                                                                                                                                                                                                                                                                                                                                                                                                                                                                                                                                                                                                                                                                                                           |
| Secondary Subject Heading:      | Epidemiology, Public health                                                                                                                                                                                                                                                                                                                                                                                                                                                                                                                                                                                                                                                                                                                                                                                                                                                                                                                                                                                                                                                                                                                                                                                                                                                                                                                                                                                                                                                                                                                                                                                                                                                             |
| Keywords:                       | PUBLIC HEALTH, EPIDEMIOLOGY, NEONATOLOGY                                                                                                                                                                                                                                                                                                                                                                                                                                                                                                                                                                                                                                                                                                                                                                                                                                                                                                                                                                                                                                                                                                                                                                                                                                                                                                                                                                                                                                                                                                                                                                                                                                                |
|                                 |                                                                                                                                                                                                                                                                                                                                                                                                                                                                                                                                                                                                                                                                                                                                                                                                                                                                                                                                                                                                                                                                                                                                                                                                                                                                                                                                                                                                                                                                                                                                                                                                                                                                                         |

SCHOLARONE™  
Manuscripts

1  
2  
3  
4  
5  
6  
7  
8  
9  
10  
11  
12  
13  
14  
15  
16  
17  
18  
19  
20  
21  
22  
23  
24  
25  
26  
27  
28  
29  
30  
31  
32  
33  
34  
35  
36  
37  
38  
39  
40  
41  
42  
43  
44  
45  
46  
47  
48  
49  
50  
51  
52  
53  
54  
55  
56  
57  
58  
59  
60

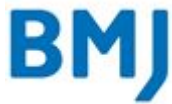

I, the Submitting Author has the right to grant and does grant on behalf of all authors of the Work (as defined in the below author licence), an exclusive licence and/or a non-exclusive licence for contributions from authors who are: i) UK Crown employees; ii) where BMJ has agreed a CC-BY licence shall apply, and/or iii) in accordance with the terms applicable for US Federal Government officers or employees acting as part of their official duties; on a worldwide, perpetual, irrevocable, royalty-free basis to BMJ Publishing Group Ltd ("BMJ") its licensees and where the relevant Journal is co-owned by BMJ to the co-owners of the Journal, to publish the Work in this journal and any other BMJ products and to exploit all rights, as set out in our [licence](#).

The Submitting Author accepts and understands that any supply made under these terms is made by BMJ to the Submitting Author unless you are acting as an employee on behalf of your employer or a postgraduate student of an affiliated institution which is paying any applicable article publishing charge ("APC") for Open Access articles. Where the Submitting Author wishes to make the Work available on an Open Access basis (and intends to pay the relevant APC), the terms of reuse of such Open Access shall be governed by a Creative Commons licence – details of these licences and which [Creative Commons](#) licence will apply to this Work are set out in our licence referred to above.

Other than as permitted in any relevant BMJ Author's Self Archiving Policies, I confirm this Work has not been accepted for publication elsewhere, is not being considered for publication elsewhere and does not duplicate material already published. I confirm all authors consent to publication of this Work and authorise the granting of this licence.

1  
2  
3  
4  
5  
6  
7  
8  
9  
10  
11  
12  
13  
14  
15  
16  
17  
18  
19  
20  
21  
22  
23  
24  
25  
26  
27  
28  
29  
30  
31  
32  
33  
34  
35  
36  
37  
38  
39  
40  
41  
42  
43  
44  
45  
46  
47  
48  
49  
50  
51  
52  
53  
54  
55  
56  
57  
58  
59  
60

**1 Neonatal mortality and leading causes of deaths: a descriptive study in China, 2014-**  
**2 2018**

3  
4 Yuxi Liu, MIPH, MHM<sup>a</sup>; Leni Kang, PhD<sup>a</sup>; Chunhua He, MD<sup>a</sup>; Lei Miao, MD<sup>a</sup>; Xiaoqiong  
5 Qiu, MD<sup>d</sup>; Weipeng Xia, MD<sup>e</sup>; Jun Zhu, MD<sup>a,c</sup>; Juan Liang, MD<sup>a</sup>; Qi Li, MD<sup>a</sup>; Yanping  
6 Wang, MD<sup>a,▲</sup>; Hanmin Liu, PhD<sup>b,c,▲</sup>.

7  
8 <sup>a</sup> National Office for Maternal and Child Health Surveillance of China, West China Second  
9 University Hospital, Sichuan University, Chengdu, Sichuan, China

10 <sup>b</sup> Department of Pediatrics, West China Second University Hospital, Sichuan University,  
11 Chengdu, China

12 <sup>c</sup> Key Laboratory of Birth Defects and Related Diseases of Women and Children of the  
13 Ministry of Education, West China Second University Hospital, Sichuan University,  
14 Chengdu, China

15 <sup>d</sup> Pidun district people's hospital, Chengdu, Sichuan, China

16 <sup>e</sup> Department of Pediatrics, Second People's Hospital of Zhaotong, Zhaotong, Yunnan,  
17 China

18  
19  
20 ▲ These authors contributed equally to this work.

**Corresponding authors:** Yanping Wang, National Office for Maternal and Child Health Surveillance of China, West China Second University Hospital, Sichuan University, Chengdu, Sichuan, China, email: wyxianping@163.com; and Hanmin Liu; Department of Pediatrics, West China Second University Hospital, Sichuan University, Chengdu, China, email: hanmin@vip.163.com

1  
2  
3  
4  
5  
6  
7  
8  
9  
10  
11  
12  
13  
14  
15  
16  
17  
18  
19  
20  
21  
22  
23  
24  
25  
26  
27  
28  
29  
30  
31  
32  
33  
34  
35  
36  
37  
38  
39  
40  
41  
42  
43  
44  
45  
46  
47  
48  
49  
50  
51  
52  
53  
54  
55  
56  
57  
58  
59  
60

**Abstract**

**Objective:** The present study estimated the national and urban-rural levels and causes of neonatal deaths in China annually between 2014 and 2018 to provide data support for the further end of preventable neonatal deaths for China and other low-and middle-income countries.

**Methods:** The study was based on data from the National Maternal and Child Health Surveillance System (NMCHSS). All neonates of surveillance districts (gestational week  $\geq 28$  weeks) who died after delivery have been involved in the study. The mortality rate and the leading causes of death for neonates were analyzed.

**Results:** The NMR of China has steadily decreased from 5.9 deaths per 1000 live births in 2014 to 3.9 deaths per 1000 live births in 2018. The NMR in 2018 of urban and rural areas was 2.2 deaths per 1000 live births and 4.7 deaths per 1000 live births, respectively. The leading preventable causes of neonatal deaths are the same in the urban and rural areas were same, which were preterm birth, intrapartum complications, and pneumonia. Mortality rates of these three causes fell significantly between 2014 and 2018 but contributed to a higher proportion of deaths in rural areas than urban areas. The proportion of preventable deaths accounted for 73.9% in 2018.

**Conclusions:** The NMR of China has decreased steadily from 2014 to 2018. However, the inequality between urban and rural areas still exists. The goal of government interventions

should be to reduce the health inequality of neonates and further take targeted measures to eliminate preventable neonatal death.

**Keywords:** neonatal mortality, leading cause, Surveillance, inequality, China

### **Strengths and limitations of this study**

- This is the first study to show the status of neonatal deaths in China from 2014 to 2018.
- The study covers the most geographically extensive newborn population in mainland China.
- The data from the National Maternal and Child Health Surveillance System used in this study have been shown to be representative of mainland China and to be of high quality for the recording of death causes of children under 5.
- The system has not covered the pre-natal assessment due to design limitations.

1  
2  
3  
4  
5  
6  
7  
8  
9  
10  
11  
12  
13  
14  
15  
16  
17  
18  
19  
20  
21  
22  
23  
24  
25  
26  
27  
28  
29  
30  
31  
32  
33  
34  
35  
36  
37  
38  
39  
40  
41  
42  
43  
44  
45  
46  
47  
48  
49  
50  
51  
52  
53  
54  
55  
56  
57  
58  
59  
60

**Introduction**

In 2015, the United Nations (UN) summit on sustainable development formally adopted the 2030 agenda for sustainable development. In SDG3, the goal is to end preventable neonatal and under-five child deaths by 2030<sup>1</sup>, with all countries aiming to reduce neonatal mortality to at least as low as 12 deaths per 1,000 live births and under-five mortality to at least as low as 25 deaths per 1,000 live births. The importance of newborn health issues has received global attention. The Chinese government has always attached great importance to the survival, protection, and development of children, and has made great achievements in reducing child mortality. Professional institutions for maternal and child health care began to be established in 1950<sup>2</sup>. Moreover, the Chinese government has taken U5MR, IMR, and other indicators of children's health as assessment targets for provincial governments, and has promulgated the National Program of Action for Child Development in China every decade since 1990s<sup>2,3</sup>.

Globally, there were 5.3 million deaths occurred on children under 5 in 2018, 47% of them died during their first month of life. The vast majority of neonatal deaths occur in low - and middle-income countries. Approximately 73,000 neonates died in China in 2018, accounting for about 3.0% of the total newborn deaths worldwide, ranking sixth in the world<sup>4</sup>. Moreover, the global decline in neonatal mortality rate (NMR) has been slower than the decline in the under-five mortality rate (U5MR)<sup>6</sup>. Global U5MR declined from 93 per 1,000 live births in 1990 to 39 per 1,000 live births in 2018, while that of NMR only

declined from 37 per 1,000 live births to 18 per 1,000 live births during the same period.

Additionally, a great many studies have shown that neonatal deaths amounting to a large proportion of total mortality of children under 5<sup>5-7</sup>. Therefore, reducing preventable neonatal deaths is important to further reduce the U5MR.

China has achieved the MDG4 (Millennium Development Goal 4) eight years ahead of schedule in 2007<sup>8-13</sup>, and it is also rated by the World Health Organization as a country with "high performance in maternal and child health". In 2018, the NMR of China was 3.9 deaths per 1000 live births, which was lower than the target of SDG3<sup>14</sup>. However, according to the NMR data from World Bank in 2018, the NMR of China is at a low level in developing countries (such as the NMR in Brazil was 8.1 deaths per 1000 live births, and Thailand was 5.0 deaths per 1000 live births), it still lags behind that in developed countries (such as the NMR in Australia was 2.3 deaths per 1000 live births, and Germany was 2.2 deaths per 1000 live births)<sup>15</sup>. Moreover, since urban areas generally have better economic development than rural areas, resulting in better health service infrastructure and health service infrastructures<sup>16</sup>, there is an urban-rural inequity in neonatal mortality in China<sup>17</sup>. To further shorten the gap with developed countries, and reduce the difference in neonatal mortality between urban and rural areas, there is still room for improvement in neonatal deaths in China. This study will analyze neonatal mortality trends and its mortality of major causes of death in China from 2014 to 2018 to provide data support for the further elimination of key preventable diseases that can cause neonatal deaths.

1  
2  
3  
4 123  
5  
6  
7 124  
8  
9 125  
10  
11  
12 126  
13  
14  
15 127  
16  
17 128  
18  
19 129  
20  
21  
22 130  
23  
24  
25 131  
26  
27 132  
28  
29  
30 133  
31  
32 134  
33  
34  
35 135  
36  
37  
38 136  
39  
40 137  
41  
42  
43 138  
44

**Materials and Methods**

*Study subjects*

The study covered all the 327 districts of the National Maternal and Child Health Surveillance Districts (with 124 urban districts and 203 rural districts) in 31 provinces, autonomous regions, and municipalities of China. Further details about the National Maternal and Child Health Surveillance System (NMCHSS) have been described elsewhere<sup>18</sup>.

All neonates of surveillance districts (gestational week  $\geq 28$  weeks) who died after delivery, and had one of the four vital signs would be involved in surveillance subject, including heartbeat, breath, umbilical cord pulsation, and voluntary muscle contraction. The surveillance subject also includes adoption children and children of non-local household residents whose mothers have living in the surveillance districts for more than one year.

*Data collection and quality control*

After each child died in the surveillance districts, the local village doctor (or community doctor) needs to report to the local township health centers (or community health service centers) within 10 days. Local township health centers (or community health service

1  
2  
3  
4 143 centers) need to be verified within 7 days after reporting and fill the Child Death Report  
5  
6 144 Card based on the hospital's death diagnosis. If the child died at home or on the way to the  
7  
8  
9 145 health facilities, infer the cause of death would base on the 2016 WHO Verbal Autopsy  
10  
11 146 Standards<sup>19</sup> and then fill the Child Death Report Card. The classification of diseases  
12  
13  
14 147 according to the international classification of diseases-10 (ICD-10).  
15  
16  
17  
18 148

19  
20  
21 149 The children's mortality data was reported level by level, and the data is timely reported  
22  
23 150 through the network direct reporting system. Technical personnel responsible for  
24  
25  
26 151 monitoring work are set up at all levels to complete the collection, review, and operation  
27  
28 152 of surveillance data. The completed child death data would send to the county (or district)  
29  
30  
31 153 level maternal and child health institutions each season. The county (or district) level  
32  
33  
34 154 maternal and child health institutions would report the local child deaths status to  
35  
36 155 prefecture-level and province-level maternal and child health institutions each season, the  
37  
38  
39 156 National Office of Maternal and Child Health would summarize and analyzes the data  
40  
41  
42 157 finally.  
43  
44

45 158

46  
47  
48 159 For quality control, we have used the regular level-by-level on-site quality control system.  
49  
50  
51 160 At the county (district), city, and provincial levels, following the requirements of the  
52  
53 161 Chinese Maternal and Child Health Surveillance Work Manual, a multi-source data cross-  
54  
55  
56 162 check method is used to complete the on-site quality control work in sampling surveillance  
57  
58  
59  
60

1  
2  
3  
4  
5  
6  
7  
8  
9  
10  
11  
12  
13  
14  
15  
16  
17  
18  
19  
20  
21  
22  
23  
24  
25  
26  
27  
28  
29  
30  
31  
32  
33  
34  
35  
36  
37  
38  
39  
40  
41  
42  
43  
44  
45  
46  
47  
48  
49  
50  
51  
52  
53  
54  
55  
56  
57  
58  
59  
60

districts. The National Office of Maternal and Child Health will select 18 districts in 6 provinces each year for quality inspection<sup>17,18</sup>.

*Statistical analysis*

Results were collected in Microsoft Excel and analyzed using SPSS 22.0 (IBM, Armonk, NY, USA). The neonatal mortality rates (NMR) of different areas (urban areas & rural areas) and stages (early neonates & late neonates), and the main cause-specific mortality rates were corrected using the average underreporting rate of the national-level surveillance data quality checks in the past three years. The national NMR and the main cause-specific mortality rate were weighted calculated according to the proportion of the urban and rural population in the census. The diagnostic level composition ratio of the neonate is calculated based on the reported Child Death Report Card, excluding children who died of accidental injuries<sup>17</sup>.

The Poisson regression model was used to calculate the average annual rate of decline of NMR, cause-of-death mortality, and its 95% confidence interval in the country, urban and rural areas, and its 95% confidence interval in early and late neonates, respectively. Linear by the linear association in the chi-square test using SPSS software was used to test whether there was a linear downward trend in different regions and causes of death.

1  
2  
3  
4 182  
5  
6

7 183 *Ethics approval and consent to participate*  
8  
9

10 184 This study was approved by the Ethics Committee of West China Second University  
11  
12 185 Hospital, Sichuan University, China.  
13  
14  
15

16 186  
17  
18

19 187 *Patient and public involvement*  
20  
21

22 188 Patients and members of the public were not involved in the design of this study.  
23  
24  
25

26 189  
27  
28

## 29 190 **Result**

30  
31  
32 191 *1. The NMR of China from 2014 to 2018*  
33  
34  
35

36 192 At the national level, the NMR of China has steadily decreased from 5.9 deaths per 1000  
37  
38 193 live births in 2014 to 3.9 deaths per 1000 live births in 2018 ( $p<0.001$ ), the average  
39  
40 194 annual rate of decline was 10.7%. The NMR of urban and rural areas have both showed a  
41  
42 195 declining trend in the same period ( $p<0.001$ ). The mortality rate of urban areas  
43  
44 196 decreased from 3.5 deaths per 1000 live births to 2.2 deaths per 1000 live births, with the  
45  
46 197 average annual rate of decline was 13.0%. In rural areas, the NMR decreased significantly  
47  
48 198 from 2014 to 2018 (6.9 deaths per 1000 live births to 4.7 deaths per 1000 live births, the  
49  
50 199 average annual rate of decline was 10.6%,  $p<0.001$ ). The absolute difference between  
51  
52  
53  
54  
55  
56  
57  
58  
59  
60

1  
2  
3  
4  
5  
6  
7  
8  
9  
10  
11  
12  
13  
14  
15  
16  
17  
18  
19  
20  
21  
22  
23  
24  
25  
26  
27  
28  
29  
30  
31  
32  
33  
34  
35  
36  
37  
38  
39  
40  
41  
42  
43  
44  
45  
46  
47  
48  
49  
50  
51  
52  
53  
54  
55  
56  
57  
58  
59  
60

NMR of urban and rural areas has reduced from 3.4 deaths per 1000 live births to 2.5 deaths per 1000 live births, but the relative difference has increased from 2.0 to 2.2. (See **Figure 1**)

2. *Cause of neonates mortality in China from 2014 to 2018*

Nationwide, compared with 2014, the neonatal deaths caused due to preterm birth, intrapartum complication, and pneumonia in 2018 have sharply decreased. Among the particular diseases, the intrapartum complications have the highest average annual decline rate (AADR) from 2014 to 2018 (with 13.5%,  $p<0.001$ ). The smallest AADR belonged to Tetanus (with 0.8%,  $p<0.05$ ). In any given year, preterm birth, intrapartum complication, and pneumonia were the top three leading causes of neonatal death in China, total accounting for nearly 60%. (See **Table 1**) In 2018, all deaths causes have been divided into preventable diseases and unpreventable diseases to analyze the proportion. The proportion of preventable diseases reached 73.9%. Moreover, the top three diseases at the national level were preterm birth, intrapartum complications, and congenital malformations. (See **Figure 2A**)

216 Table 1. The proportion of cause-specific neonatal mortality in China from 2014 to 2018

| Causes of death            | 0-6 days |      |      |      |      | 7-28 days |      |      |      |      | 0-28 days |      |      |      |      |
|----------------------------|----------|------|------|------|------|-----------|------|------|------|------|-----------|------|------|------|------|
|                            | 2014     | 2015 | 2016 | 2017 | 2018 | 2014      | 2015 | 2016 | 2017 | 2018 | 2014      | 2015 | 2016 | 2017 | 2018 |
| <b>Nationalwide</b>        |          |      |      |      |      |           |      |      |      |      |           |      |      |      |      |
| Preterm birth              | 32.3     | 33.1 | 32.0 | 36.2 | 26.7 | 19        | 24.2 | 19.9 | 22.3 | 28.8 | 29.1      | 30.8 | 28.7 | 32.2 | 27.3 |
| Intrapartum complications  | 29.0     | 31.9 | 27.0 | 26.4 | 28.5 | 8.4       | 7.1  | 6    | 6.2  | 5.6  | 24.2      | 25.5 | 21.4 | 20.6 | 21.7 |
| Pneumonia                  | 9.5      | 6.9  | 9.0  | 8.0  | 7.9  | 17.3      | 13.5 | 18   | 18.2 | 11.5 | 11.3      | 8.6  | 11.4 | 11   | 9    |
| Diarrhea                   | 0.1      | 0.0  | 0.0  | 0.0  | 0.2  | 1.3       | 2    | 1.1  | 0.2  | 1    | 0.4       | 0.5  | 0.3  | 0    | 0.4  |
| Tetanus                    | 0.0      | 0.0  | 0.0  | 0.0  | 0.0  | 0.6       | 0.0  | 0.0  | 0.0  | 0.0  | 0.1       | 0    | 0    | 0    | 0    |
| HIV                        | 0.0      | 0.0  | 0.0  | 0.0  | 0.0  | 0.0       | 0.0  | 0.0  | 0.0  | 0.0  | 0         | 0    | 0    | 0    | 0    |
| Neonatal sepsis/meningitis | 1.6      | 2.1  | 2.7  | 2.4  | 3.0  | 5.3       | 4.3  | 7.5  | 5.8  | 9.8  | 2.5       | 2.6  | 4    | 3.3  | 5    |
| Other infectious diseases  | 0.3      | 0.3  | 0.2  | 0.3  | 0.0  | 0.3       | 0.0  | 0.4  | 0.0  | 0.0  | 0.3       | 0.2  | 0.3  | 0.2  | 0    |
| Congenital malformations   | 15.5     | 12.5 | 16.1 | 16.7 | 19.0 | 23.4      | 22.8 | 26.4 | 22.7 | 22.8 | 17.4      | 15.2 | 18.9 | 18.5 | 20.2 |
| Other diseases             | 11.7     | 13.2 | 12.9 | 9.9  | 14.7 | 24.4      | 26.1 | 20.7 | 24.6 | 20.5 | 14.7      | 16.6 | 15   | 14.2 | 16.4 |
| <b>Urban area</b>          |          |      |      |      |      |           |      |      |      |      |           |      |      |      |      |
| Preterm birth              | 35.5     | 30   | 26.6 | 36.5 | 29.1 | 15.5      | 24.6 | 22.8 | 19.8 | 27.9 | 31.4      | 28.6 | 25.5 | 31.8 | 28.8 |
| Intrapartum complications  | 28       | 30   | 28.2 | 27.8 | 24.3 | 18.1      | 10.4 | 5.5  | 11.2 | 6.4  | 25.9      | 24.6 | 21.8 | 23.2 | 18.7 |
| Pneumonia                  | 7.3      | 7.9  | 10.7 | 6.4  | 5.3  | 11.3      | 8.2  | 15.1 | 14.5 | 8.1  | 8.1       | 8    | 12   | 8.6  | 6.1  |
| Diarrhea                   | 0.0      | 0.0  | 0.0  | 0.0  | 0.0  | 0.8       | 0.8  | 0.0  | 0.7  | 0.9  | 0.2       | 0.2  | 0    | 0.2  | 0.3  |
| Tetanus                    | 0.0      | 0.0  | 0.0  | 0.0  | 0.0  | 0.0       | 0.0  | 0.0  | 0.0  | 0.0  | 0         | 0    | 0    | 0    | 0    |
| HIV                        | 0.0      | 0.0  | 0.0  | 0.0  | 0.0  | 0.0       | 0.0  | 0.0  | 0.0  | 0.0  | 0         | 0    | 0    | 0    | 0    |

|                            |      |      |      |      |      |      |      |      |      |      |      |      |      |      |      |
|----------------------------|------|------|------|------|------|------|------|------|------|------|------|------|------|------|------|
| Neonatal sepsis/meningitis | 2.7  | 2.5  | 4.7  | 4.3  | 8.1  | 3.4  | 7.5  | 8.3  | 12.4 | 12.6 | 2.9  | 3.9  | 5.7  | 6.6  | 9.5  |
| Other infectious diseases  | 0.7  | 0.9  | 0.5  | 0.8  | 0.0  | 0.0  | 0.0  | 0.7  | 0.0  | 0    | 0.5  | 0.6  | 0.6  | 0.5  | 0    |
| Congenital malformations   | 17.3 | 16.4 | 17.8 | 16.3 | 15.4 | 32.8 | 28.4 | 24.2 | 20.4 | 26.2 | 20.5 | 19.7 | 19.6 | 17.5 | 18.7 |
| Other diseases             | 8.4  | 12.2 | 11.5 | 7.9  | 17.8 | 18.1 | 20.1 | 23.4 | 21.0 | 17.9 | 10.5 | 14.4 | 14.9 | 11.6 | 17.9 |
| <b>Rural area</b>          |      |      |      |      |      |      |      |      |      |      |      |      |      |      |      |
| Preterm birth              | 31.5 | 33.7 | 33.2 | 36.1 | 26.2 | 19.6 | 24.1 | 19.1 | 22.9 | 29   | 28.6 | 31.3 | 29.5 | 32.3 | 27   |
| Intrapartum complications  | 29.2 | 32.3 | 26.8 | 26.1 | 29.3 | 6.4  | 6.2  | 6.1  | 5.2  | 5.4  | 23.8 | 25.7 | 21.3 | 20.1 | 22.3 |
| Pneumonia                  | 10.0 | 6.7  | 8.7  | 8.4  | 8.4  | 18.6 | 14.8 | 18.7 | 18.9 | 12.4 | 12   | 8.7  | 11.3 | 11.5 | 9.6  |
| Diarrhea                   | 0.1  | 0.0  | 0.0  | 0.0  | 0.2  | 1.4  | 2.4  | 1.3  | 0.0  | 1.1  | 0.4  | 0.6  | 0.3  | 0    | 0.5  |
| Tetanus                    | 0.0  | 0.0  | 0.0  | 0.0  | 0.0  | 0.7  | 0.0  | 0.0  | 0.0  | 0.0  | 0.2  | 0    | 0    | 0    | 0    |
| HIV                        | 0.0  | 0.0  | 0.0  | 0.0  | 0.0  | 0.0  | 0.0  | 0.0  | 0.0  | 0.0  | 0    | 0    | 0    | 0    | 0    |
| Neonatal sepsis/meningitis | 1.3  | 2.0  | 2.2  | 1.9  | 2.0  | 5.7  | 3.5  | 7.4  | 4.3  | 9.1  | 2.4  | 2.4  | 3.6  | 2.6  | 4.1  |
| Other infectious diseases  | 0.2  | 0.1  | 0.2  | 0.2  | 0.0  | 0.4  | 0.0  | 0.4  | 0.0  | 0.0  | 0.3  | 0.1  | 0.2  | 0.1  | 0    |
| Congenital malformations   | 15.1 | 11.7 | 15.7 | 16.8 | 19.8 | 21.4 | 21.4 | 27.0 | 23.3 | 22.0 | 16.6 | 14.1 | 18.7 | 18.7 | 20.4 |
| Other diseases             | 12.5 | 13.5 | 13.2 | 10.4 | 14.0 | 25.7 | 27.6 | 20.0 | 25.4 | 21.0 | 15.7 | 17.1 | 15   | 14.7 | 16.1 |

222 Table 2. Leading causes of death in neonates in China from 2014 to 2018

| Causes of death                   | Cause-specific mortality (per 100,000livebirths) |       |       |       |      |                                 |                    |      |      |      |      |                                 |                          |       |       |       |       |                                 |
|-----------------------------------|--------------------------------------------------|-------|-------|-------|------|---------------------------------|--------------------|------|------|------|------|---------------------------------|--------------------------|-------|-------|-------|-------|---------------------------------|
|                                   | 0-6 (<7) days newborns                           |       |       |       |      |                                 | 7-27 days newborns |      |      |      |      |                                 | 0-27 (<28) days newborns |       |       |       |       |                                 |
|                                   | 2014                                             | 2015  | 2016  | 2017  | 2018 | Average annual decline rate (%) | 2014               | 2015 | 2016 | 2017 | 2018 | Average annual decline rate (%) | 2014                     | 2015  | 2016  | 2017  | 2018  | Average annual decline rate (%) |
| <b>Nationalwide</b>               |                                                  |       |       |       |      |                                 |                    |      |      |      |      |                                 |                          |       |       |       |       |                                 |
| <b>Preterm birth</b>              | 144.8                                            | 133.5 | 113.8 | 115.7 | 73.4 | 12.7 (15.1,10.2) **             | 25.9               | 33.7 | 26.0 | 28.7 | 33.2 | -3.2 (2.4,-9.1) $\Delta$        | 170.7                    | 167.2 | 139.8 | 144.4 | 106.6 | 9.7 (7.4, 11.9) **              |
| <b>Intrapartum complications</b>  | 130.2                                            | 128.7 | 96.1  | 84.5  | 78.2 | 13.5 (16.1,10.9) **             | 11.5               | 9.8  | 7.8  | 8.0  | 6.4  | 12.7 (21.3,3.3) **              | 141.7                    | 138.5 | 103.9 | 92.5  | 84.6  | 13.5 (11.0, 15.9) **            |
| <b>Pneumonia</b>                  | 42.4                                             | 27.9  | 32.1  | 25.7  | 21.7 | 13.6 (18.3,8.7) **              | 23.7               | 18.8 | 23.6 | 23.4 | 13.3 | 7.2 (13.1,0.8) *                | 66.1                     | 46.7  | 55.7  | 49.1  | 35    | 11.0 (7.1, 14.7) **             |
| <b>Diarrhea</b>                   | 0.4                                              | 0.0   | 0.0   | 0.0   | 0.5  | -                               | 1.8                | 2.8  | 1.4  | 0.2  | 1.2  | 24.5 (41.7,2.1) $\Delta$        | 2.2                      | 2.8   | 1.4   | 0.2   | 1.7   | 20.1 (-2.0, 37.4) $\Delta$      |
| <b>Tetanus</b>                    | 0.0                                              | 0.0   | 0.0   | 0.0   | 0.0  | -                               | 0.8                | 0.0  | 0.0  | 0.0  | 0.0  | -                               | 0.8                      | 0     | 0     | 0     | 0     | -                               |
| <b>HIV</b>                        | 0.0                                              | 0.0   | 0.0   | 0.0   | 0.0  | -                               | 0.0                | 0.0  | 0.0  | 0.0  | 0.0  | -                               | 0                        | 0     | 0     | 0     | 0     | -                               |
| <b>Neonatal sepsis/meningitis</b> | 7.2                                              | 8.4   | 9.4   | 7.6   | 8.3  | -2 (8.2,-13.3) $\Delta$         | 7.3                | 5.9  | 9.9  | 7.4  | 11.3 | -12.1 (-0.9,-24.5) *            | 14.5                     | 14.3  | 19.3  | 15    | 19.6  | -6.5 (-14.7, 1.2) $\Delta$      |
| <b>Other infectious</b>           | 1.4                                              | 1.1   | 0.8   | 0.9   | 0.0  | 30.1                            | 0.4                | 0.0  | 0.6  | 0.0  | 0.0  | 35.6 (68,-                      | 1.8                      | 1.1   | 1.4   | 0.9   | 0     | 33.1                            |

|                            |      |      |      |      |      |                            |      |      |      |      |      |                            |       |      |      |      |      |                            |
|----------------------------|------|------|------|------|------|----------------------------|------|------|------|------|------|----------------------------|-------|------|------|------|------|----------------------------|
| diseases                   |      |      |      |      |      | (51,0.3) $\Delta$          |      |      |      |      |      | 29.5) $\Delta$             |       |      |      |      |      | (7.9, 51.4) *              |
| Congenital malformations   | 69.8 | 50.6 | 57.3 | 53.5 | 52.3 | 5.6 (9.3,1.8) **           | 31.9 | 31.7 | 34.6 | 29.3 | 26.2 | 4.3 (9.4,-1) $\Delta$      | 101.7 | 82.3 | 91.9 | 82.8 | 78.5 | 5.1 (2.0, 8.1) **          |
| Other diseases             | 52.8 | 53.6 | 45.9 | 31.6 | 40.2 | 10.4 (14.3,6.2) **         | 33.3 | 36.4 | 27.1 | 31.8 | 23.6 | 7.4 (12.3,2.2) **          | 86.1  | 90   | 73   | 63.4 | 63.8 | 9.2 (5.9, 12.3) **         |
| Urban area                 |      |      |      |      |      |                            |      |      |      |      |      |                            |       |      |      |      |      |                            |
| Preterm birth              | 99.7 | 70.9 | 55.6 | 69.6 | 44.2 | 15 (19.4,10.4) **          | 11.5 | 22.0 | 18.9 | 14.7 | 19.1 | -4.2 (6.2,-15.7) $\Delta$  | 111.2 | 92.9 | 74.5 | 84.3 | 63.3 | 11.4 (7.1, 15.5) **        |
| Intrapartum complications  | 78.6 | 70.9 | 59.0 | 53.1 | 36.9 | 15.8 (20.5,10.9) **        | 13.4 | 9.3  | 4.6  | 8.3  | 4.3  | 21.2 (32.7,7.9) *          | 92    | 80.2 | 63.6 | 61.4 | 41.2 | 16.4 (11.8, 20.7) **       |
| Pneumonia                  | 20.4 | 18.7 | 22.3 | 12.2 | 8.0  | 18 (26.5,8.5) **           | 8.4  | 7.4  | 12.6 | 10.7 | 5.5  | 2.7 (15.8,-12.4) $\Delta$  | 28.8  | 26.1 | 34.9 | 22.9 | 13.5 | 12.4 (4.5, 19.7) **        |
| Diarrhea                   | 0.0  | 0.0  | 0.0  | 0.0  | 0.0  | -                          | 0.6  | 0.7  | 0.0  | 0.5  | 0.6  | 2.7 (51.8,-96.6) $\Delta$  | 0.6   | 0.7  | 0    | 0.5  | 0.6  | 2.7 (-96.6, 51.8) $\Delta$ |
| Tetanus                    | 0.0  | 0.0  | 0.0  | 0.0  | 0.0  | -                          | 0.0  | 0.0  | 0.0  | 0.0  | 0.0  | -                          | 0     | 0    | 0    | 0    | 0    | -                          |
| HIV                        | 0.0  | 0.0  | 0.0  | 0.0  | 0.0  | -                          | 0.0  | 0.0  | 0.0  | 0.0  | 0.0  | -                          | 0     | 0    | 0    | 0    | 0    | -                          |
| Neonatal sepsis/meningitis | 7.7  | 6.0  | 9.7  | 8.3  | 12.3 | -13.8 (1.9,-32.1) $\Delta$ | 2.5  | 6.7  | 6.9  | 9.2  | 8.6  | -25.5 (-5.7,-49.1) **      | 10.2  | 12.7 | 16.6 | 17.5 | 20.9 | 2.7 (-96.6, 51.8) **       |
| Other infectious diseases  | 1.9  | 2.0  | 1.1  | 1.5  | 0.0  | 33 (56,-1.9) $\Delta$      | 0.0  | 0.0  | 0.6  | 0.0  | 0.0  | 2.7 (76.2,-297.1) $\Delta$ | 1.9   | 2    | 1.7  | 1.5  | 0    | 25.2 (-7.7, 48.1) $\Delta$ |

|                                   |       |       |       |       |      |                                   |      |      |      |      |      |                                    |       |       |       |       |       |                                     |
|-----------------------------------|-------|-------|-------|-------|------|-----------------------------------|------|------|------|------|------|------------------------------------|-------|-------|-------|-------|-------|-------------------------------------|
| <b>Congenital malformations</b>   | 48.6  | 38.8  | 37.2  | 31.2  | 23.3 | 14.9<br>(20.9,8.4)**              | 24.3 | 25.4 | 20.1 | 15.1 | 17.9 | 10.8 (19,1.8)*                     | 72.9  | 64.2  | 57.3  | 46.3  | 41.2  | 13.6<br>(8.4, 18.5)**               |
| <b>Other diseases</b>             | 23.6  | 28.7  | 24.1  | 15.1  | 27.0 | 3.5 (11.8,-<br>5.5) <sup>△</sup>  | 13.5 | 18.1 | 19.4 | 15.6 | 12.3 | 3.3 (13.3,-<br>7.8) <sup>△</sup>   | 37.1  | 46.8  | 43.5  | 30.7  | 39.3  | 3.2 (-<br>3.7, 9.7)<br><sup>△</sup> |
| <b>Rural area</b>                 |       |       |       |       |      |                                   |      |      |      |      |      |                                    |       |       |       |       |       |                                     |
| <b>Preterm birth</b>              | 165.0 | 161.4 | 139.8 | 136.2 | 86.4 | 12<br>(15.2,8.8)**                | 32.2 | 38.9 | 29.1 | 35.1 | 39.5 | -4.1 (2.9,-<br>11.7) <sup>△</sup>  | 197.2 | 200.3 | 168.9 | 171.3 | 125.9 | 9.2 (6.3,<br>12.1)**                |
| <b>Intrapartum complications</b>  | 153.2 | 154.5 | 112.6 | 98.5  | 96.6 | 13.1<br>(16.3,9.7)**              | 10.6 | 10.0 | 9.3  | 8.0  | 7.4  | 8.2 (20.2,-<br>5.5) <sup>△</sup>   | 163.8 | 164.5 | 121.9 | 106.5 | 104   | 12.8<br>(9.5, 15.9)**               |
| <b>Pneumonia</b>                  | 52.3  | 32.0  | 36.4  | 31.7  | 27.8 | 12.9<br>(18.8,6.5)**              | 30.5 | 23.9 | 28.5 | 29.1 | 16.9 | 7.6 (14.9,-<br>0.4) <sup>△</sup>   | 82.8  | 55.9  | 64.9  | 60.8  | 44.7  | 10.8<br>(5.9, 15.5)**               |
| <b>Diarrhea</b>                   | 0.6   | 0.0   | 0.0   | 0.0   | 0.7  | -                                 | 2.3  | 3.8  | 2.0  | 0.0  | 1.5  | 25.1 (45.4,-<br>2.8) <sup>△</sup>  | 2.9   | 3.8   | 2     | 0     | 2.2   | 25.5 (-<br>0.3, 44.6)*              |
| <b>Tetanus</b>                    | 0.0   | 0.0   | 0.0   | 0.0   | 0.0  | -                                 | 1.2  | 0.0  | 0.0  | 0.0  | 0.0  | -                                  | 1.2   | 0     | 0     | 0     | 0     | -                                   |
| <b>HIV</b>                        | 0.0   | 0.0   | 0.0   | 0.0   | 0.0  | -                                 | 0.0  | 0.0  | 0.0  | 0.0  | 0.0  | -                                  | 0     | 0     | 0     | 0     | 0     | -                                   |
| <b>Neonatal sepsis/meningitis</b> | 7.0   | 9.4   | 9.3   | 7.3   | 6.6  | 3.3 (16.7,-<br>12.4) <sup>△</sup> | 9.4  | 5.7  | 11.2 | 6.6  | 12.4 | -7.3 (6.7,-<br>23.5) <sup>△</sup>  | 16.4  | 15.1  | 20.5  | 13.9  | 19    | -2.3 (-<br>13.2, 7.7) <sup>△</sup>  |
| <b>Other infectious diseases</b>  | 1.2   | 0.6   | 0.7   | 0.7   | 0.0  | 30.3 (60.9,-<br>24) <sup>△</sup>  | 0.6  | 0.0  | 0.6  | 0.0  | 0.0  | 42.4 (82.5,-<br>89.3) <sup>△</sup> | 1.8   | 0.6   | 1.3   | 0.7   | 0     | 29.7 (-<br>13.7, 56.6) <sup>△</sup> |
| <b>Congenital</b>                 | 79.3  | 55.9  | 66.2  | 63.5  | 65.2 | 3.3 (8.2,-                        | 35.2 | 34.5 | 41.1 | 35.7 | 30.0 | 2.5 (9.1,-4.6)                     | 114.5 | 90.4  | 107.3 | 99.2  | 95.2  | 3.0 (-                              |

1  
2  
3  
4  
5  
6  
7  
8  
9  
10  
11  
12  
13  
14  
15  
16  
17  
18  
19  
20  
21  
22  
23  
24  
25  
26  
27  
28  
29  
30  
31  
32  
33  
34  
35  
36  
37  
38  
39  
40  
41  
42  
43  
44  
45  
46  
47

|                |      |      |      |      |      |                       |      |      |      |      |      |                     |     |       |      |    |      |                        |
|----------------|------|------|------|------|------|-----------------------|------|------|------|------|------|---------------------|-----|-------|------|----|------|------------------------|
| malformations  |      |      |      |      |      | 1.8) $\Delta$         |      |      |      |      |      | $\Delta$            |     |       |      |    |      | 1.2, 6.9)<br>$\Delta$  |
| Other diseases | 65.8 | 64.7 | 55.6 | 39.0 | 46.1 | 11.6<br>(16.5,6.4) ** | 42.2 | 44.6 | 30.5 | 39.0 | 28.6 | 8.5 (14.6,1.9)<br>* | 108 | 109.3 | 86.1 | 78 | 74.7 | 10.3<br>(6.3, 14.2) ** |

(\*\* means p value<0.01, \* means p value<0.05,  $\Delta$  means p value $\geq$ 0.05)

For peer review only

1  
2  
3  
4 245 The death cause distribution and AADR were also significantly different among urban-  
5  
6 246 rural areas. In urban areas, preterm birth, intrapartum complication, and congenital  
7  
8  
9 247 anomalies also accounting the largest proportion of all deaths cause from 2014 to 2018.  
10  
11  
12 248 Moreover, the AADR of preterm birth, intrapartum complications, pneumonia, and  
13  
14 249 congenital malformations in urban areas were all larger than that of the national level. In  
15  
16  
17 250 rural areas, the mortality rate of preterm birth, intrapartum complication, and congenital  
18  
19  
20 251 anomalies significantly decreased. Additionally, the NMR of diarrhea have sharply  
21  
22 252 decreased, with AADR was 25.5% ( $p<0.001$ ). (See **Table 2**)  
23  
24 253  
25  
26 254 In contrast, the urban-rural gap still existed. The contribution of tetanus among neonates in  
27  
28  
29 255 urban areas remains zero during the study period, while the rate in rural areas has been  
30  
31 256 eliminated until 2015. In 2018, the neonatal mortality in rural areas was almost twice as  
32  
33  
34 257 high as in urban areas due to preterm birth, intrapartum complications, and congenital  
35  
36 258 malformations. Moreover, during the study period, the largest number of neonatal deaths  
37  
38  
39 259 in the urban and rural areas was pneumonia, increased from 2.9 times (82.8 per 100,000  
40  
41 260 live births in rural areas VS 28.8 per 100,000 live births in urban areas) in 2014 to 3.3 times  
42  
43  
44 261 (44.7 per 100,000 live births in rural areas VS 13.5 per 1000 live births in urban areas) in  
45  
46  
47 262 2018. (See **Table 2**) In the disease proportion aspect, the proportion of intrapartum  
48  
49  
50 263 complications and pneumonia in rural areas significantly higher than that of urban areas.  
51  
52 264 (See Figure 2B&C) According to the data analysis, causes of neonatal death varied between  
53  
54  
55 265 urban and rural areas ( $P<0.05$ ), but the correlation between neonatal mortality and whether

1  
2  
3  
4  
5  
6  
7  
8  
9  
10  
11  
12  
13  
14  
15  
16  
17  
18  
19  
20  
21  
22  
23  
24  
25  
26  
27  
28  
29  
30  
31  
32  
33  
34  
35  
36  
37  
38  
39  
40  
41  
42  
43  
44  
45  
46  
47  
48  
49  
50  
51  
52  
53  
54  
55  
56  
57  
58  
59  
60

the newborn lived in urban or rural areas was weak (Cramer's  $V=0.129$ ).

The mortality rates have also shown difference when divided neonates into early neonates (0-6 days) and late neonates (7-28 days). Nationwide, except for neonatal sepsis (or meningitis) and diarrhea, the mortality rate of other causes of death of early neonates was significantly higher than that of late neonates, with the biggest difference being intrapartum complications, preterm birth, and congenital malformations. In 2018, the mortality rate of preterm birth was 73.4 per 100,000 livebirth in early neonates and 33.2 per 100,000 livebirth in late neonates. In the same year, the mortality rate of congenital malformations was 52.3 per 100,000 livebirth in early neonates and 26.2 per 100,000 livebirth in late neonates. It is worth noting that intrapartum complications were the second leading cause of death among 0-28 days newborns in China from 2014 to 2018, with the mortality rate of 78.2 per 100,000 livebirth in early neonates and only 6.4 per 100,000 livebirth in late neonates (See **Table 2**).

*3. Neonate Diagnosis Facilities Level in China between 2014 and 2018*

The children's diagnosis facilities level has also be included in surveillance. Nationwide, from 2014 to 2018, the proportion of neonate diagnosis at the provincial (or municipal) level health facilities has significantly increased, and the proportion of the district (or county) level has decreased. Moreover, the proportion of township level and village level

286 have both fluctuating declined during this period. In 2018, the proportion of neonate who  
287 has not to seek any medical care has minimized, which declined to 3.9% in 2018. (See  
288 **Figure 3**)

290 In an urban aspect, from 2014 to 2018, the majority of children (accounted for over 80%)  
291 in urban areas have been diagnosed at provincial (or municipal) level medical facilities.  
292 The proportion of the district (or county) level and township -level both have a slight rise  
293 between 2014 and 2018. As a result, the percentage of children who have not to seek  
294 medical care has declined, with 1.9% in 2014 and 1.1% in 2018. (See **Figure 3**)

296 On the contract, the diagnosis contribution figure of rural areas was different. Although the  
297 proportion of provincial (or municipal) level has shown a growth trend from 2014 to 2018,  
298 the proportion in rural areas have only half of that in urban areas. Moreover, the proportion  
299 of street-level diagnoses in the urban area is reduced to 1.4% in 2018, while this proportion  
300 in rural areas fluctuated and remained at 3.7% in the same year. Another significant  
301 contributor is the proportion of children who have not sought medical care. The proportion  
302 of neonate who has not to seek medical care has decreased, and still, 5.5% of children have  
303 not sought any medical advice. (See **Figure 3**)

1  
2  
3  
4  
5  
6  
7  
8  
9  
10  
11  
12  
13  
14  
15  
16  
17  
18  
19  
20  
21  
22  
23  
24  
25  
26  
27  
28  
29  
30  
31  
32  
33  
34  
35  
36  
37  
38  
39  
40  
41  
42  
43  
44  
45  
46  
47  
48  
49  
50  
51  
52  
53  
54  
55  
56  
57  
58  
59  
60

**Discussion**

The results of this study show that the NMR in urban and rural areas of China have decreased significantly between 2014 and 2018. In addition, there were significant differences in NMR between urban and rural areas, which were consistent with significant differences in NMR between countries and regions globally<sup>20,21</sup>.

From 2014 to 2018, Chinese NMR continued to decline, and it was dropped quickly. It benefits from the improvement of medical treatment at all levels of health facilities, and all levels of government attached great importance to strengthen the construction of the pediatric institution, raise pediatricians' payment, and continue to implement neonatal asphyxia recovery training program<sup>22</sup>. As a result, neonatal deaths from pneumonia and infectious diseases, intrapartum complications, and premature delivery were significantly reduced.

China has implemented the Safe Maternal Initiative and the National Program to Reduce Maternal Mortality and Eliminate Tetanus, China has officially eliminated neonatal tetanus in 2012<sup>23</sup>, and from 2015 to 2018, the NMR of neonatal tetanus remained 0. Moreover, through the success of the Prevention of Mother-to-child Transmission of HIV, Syphilis, and Hepatitis B Program, the HIV/AIDS mortality rate has also been 0 from 2014 to

2018<sup>24,25</sup>. Although the national neonatal mortality in 2018 was already less than 12 deaths per 1000 live births, the preventable deaths still accounted for 73.9%, mainly were pneumonia, intrapartum complication, premature birth. Among these diseases, the proportion of preterm birth was highest in both nationwide, urban areas, and rural areas. In the recent two decades, the prevalence of preterm birth has significantly increased<sup>18</sup>, especially after the Two-child Policy<sup>26</sup> was implemented in China. The mortality rate among preterm birth infants was apparently higher than the full-term infant, and the risk of mortality increases proportionally with decreasing gestational age<sup>27</sup>. Furthermore, with the widespread development of assisted reproductive technique (ART), the incidence of monozygotic twins has increased significantly<sup>28</sup>. The NMR of twins is several times higher than that of singletons<sup>29-31</sup>.

Addressing the issue of preterm birth may require different priorities in rural and urban areas. Because of the good management of many curable neonatal complications (such as pneumonia), the proportion of preterm birth in urban areas is obviously larger than that of rural areas<sup>32</sup>. Hence, urban areas need to pay more attention to preventing premature deaths less than 32 weeks of gestation. For rural areas, the local government needs to focus on the prevention of premature infants at 32-36 weeks and continue to invest in medical services to improve medical services accessibility for women and children in rural areas.

1  
2  
3  
4  
5  
6  
7  
8  
9  
10  
11  
12  
13  
14  
15  
16  
17  
18  
19  
20  
21  
22  
23  
24  
25  
26  
27  
28  
29  
30  
31  
32  
33  
34  
35  
36  
37  
38  
39  
40  
41  
42  
43  
44  
45  
46  
47  
48  
49  
50  
51  
52  
53  
54  
55  
56  
57  
58  
59  
60

In addition, from 2014 to 2018, the neonatal mortality rate in rural areas due to preterm birth, intrapartum complications, pneumonia, and congenital malformations was decreasing in rural areas but was still significantly higher than in urban areas. (See **Table 2**) The higher mortality rate may be linked to the relatively poorer economy, lower quality of health care, and lack of accessibility to health care in rural China. The average median net income per capita was ¥39251 (about US \$6000) in urban China, but ¥14617 (about the US \$2234) in rural China in 2018<sup>33</sup>. The annual spending on health care per capita accounted for 7.8% in urban China, but 10.2% in rural China in 2018<sup>34</sup>. The average health care personnel were 4.0 per 1000 people in urban China and 1.8 per 1000 people in rural China in 2018<sup>34</sup>. The number of beds in medical institutions per 1,000 people in urban areas was 8.70, compared with 4.56 in rural areas in 2018<sup>34</sup>.

Not only markedly difference the NMR of urban and rural areas has shown, but also significantly difference in early and late neonates. The results of this study showed that the range of cause-specific mortality of late neonates was significantly less than that of early neonates, both nationwide and urban-rural areas. (See **Table 2**) Therefore, for preventable neonatal diseases, the focus should be on early neonates, especially for early neonates in rural areas.

For neonates, surviving from preterm birth, intrapartum complication and pneumonia are close linking to accessibility to health care, local hospitals' obstetrics and neonates departments' treatment level, and rescue skills<sup>35,36</sup>. Therefore, the issue can be addressed from the following four aspects.

Firstly, the local governments need to strengthen the construction of RNTN (Regional Neonatal Transport Network), carry out the transport plan according to the Guidelines for the Construction and Management of Critical Neonatal Treatment Center<sup>37</sup>, and ensure the applying of professional medical staff and newborn rescue equipment for neonatal transport. Secondly, one study in Japan has pointed out that the medical care resources (including Neonatal Intensive Care Unit (NICU), midwives, emergency physicians, and emergency medical care centers) would impact the NMR decline<sup>38</sup>. Therefore, the local governments may base on the Administration guide (proposal) of the Neonatal Physician Branch of the Chinese Physician Association<sup>39</sup> to grading neonatal wards and establishing NICU after analyzing local medical establishment plan and newborn medical treatment needs. Thirdly, local health departments can regularly organize multi-level, especially provincial, prefecture-level and district-level) newborn health training programs. In rural areas, with the policies support of the New Rural Construction and the Targeted Poverty Alleviation<sup>40,41</sup>, the improved rural transport and higher incomes have prompted the enhanced accessibility of health services, and the proportion of rural children receiving

1  
2  
3  
4  
5  
6  
7  
8  
9  
10  
11  
12  
13  
14  
15  
16  
17  
18  
19  
20  
21  
22  
23  
24  
25  
26  
27  
28  
29  
30  
31  
32  
33  
34  
35  
36  
37  
38  
39  
40  
41  
42  
43  
44  
45  
46  
47  
48  
49  
50  
51  
52  
53  
54  
55  
56  
57  
58  
59  
60

384 medical treatment in provincial and municipal hospitals has significantly increased. The  
385 proportion of rural neonate diagnosis at the provincial (or municipal) level health facilities  
386 has significantly increased from 39.2% to 47.6% from 2014 to 2018. Set training objectives  
387 for medical staff in health facilities of different levels, and strengthen the newborn  
388 treatment technology in each level of health facilities. Especially for the health workers in  
389 rural areas, the newborn resuscitation training needs to be specifically strengthened.  
390 Fourthly, the local communities can strengthen publicity to encourage caregivers to take  
391 children to attend the health facilities for treatment. As for poor households, local  
392 governments can set up special subsidies for them to reduce the economic cost of medical  
393 treatment.

395 **Conclusion**

396 With the joint efforts of the economic development and the governmental policies and  
397 strategies, the neonatal mortality rate of China has significantly decreased from 2014 to  
398 2018. The gap between neonatal mortality and cause-of-death distribution still existed  
399 between urban and rural areas. The goal of government interventions should be to narrow  
400 the urban-rural gap, reduce the health inequality of neonates, and further take targeted  
401 measures to eliminate the preventable death of neonates, especially premature births, to  
402 achieve the SDGs goal.

1  
2  
3  
4 404  
5  
6

7 405 **Acknowledgments**

8  
9 406 We thank the institutions and staff of the National Maternal and Child Health Surveillance  
10  
11  
12 407 System for data collection, data provided, and case investigation.  
13  
14

15 408  
16

17 409 **Funding**

18  
19 410 This study was supported by the Ministry of Health, China (grants QT2003-009 and  
20  
21  
22 411 05wsb-02) and UNICEF (grant YH601-11-1141).  
23  
24

25 412  
26

27 413 **Author contributions**

28  
29  
30 414 Data analysis: Yuxi Liu  
31

32 415 Methodology: Hanmin Liu and Yanping Wang, Leni Kang  
33  
34

35 416 Data curation: Jun Zhu, Juan Liang, Lei Miao, Xiaoqiong Qiu, Weipeng Xia  
36  
37

38 417 Software: Chunhua He, Leni Kang and Qi Li  
39

40 418 Writing – original draft: Yuxi Liu  
41

42  
43 419 Writing – review, and editing: Yuxi Liu, Hanmin Liu, and Yanping Wang  
44  
45

46 420  
47

48 421 **Conflicts of interest**

49  
50  
51 422 The authors declare no conflicts of interest.  
52  
53

54 423  
55  
56  
57  
58  
59  
60

1  
2  
3  
4  
5  
6  
7  
8  
9  
10  
11  
12  
13  
14  
15  
16  
17  
18  
19  
20  
21  
22  
23  
24  
25  
26  
27  
28  
29  
30  
31  
32  
33  
34  
35  
36  
37  
38  
39  
40  
41  
42  
43  
44  
45  
46  
47  
48  
49  
50  
51  
52  
53  
54  
55  
56  
57  
58  
59  
60

**Data Availability Statement**

This study used data from the NMCHSS. This system is co-established by the National Health and Family Planning Commission of the People Republic of China and Sichuan University and finally owned by the National Health and Family Planning Commission of the People Republic of China. The researchers did not obtain consent to publicly share data. The de-identified data set is available upon request to interested researchers. For data requests, please contact the Department of Science and Technology of West China Second University Hospital, Sichuan University, at: fu2yuankjb@163.com. This department is in charge of all the programs in the hospital, including the data management. One staff from the department monitors this email.

**References**

1. UN (2015) . Sustainable Development Goals. <https://sustainabledevelopment.un.org/?menu=1300> (accessed 12th Mar 2020).
2. Department of Maternal and Child Health of China. 2019 report on development of maternal and child health. Beijing, 2019.
3. The State Council Information office of the People's Republic of China. The impenmentation of "National Program of Action for Child Development in China in 1990s" and "National Program of Action for Child Development in China (2001-2010)". 2001. <http://www.china.org.cn/e-news/news01-4-27-1.htm> (accessed Dec 10th 2020).
4. WHO, UNICEF, UN & World Bank Group (2019) . Levels & Trends in Child Mortality-Report 2019.
5. Zhang. CL. (2015) Analysis of surveillance results of 4074 children under 5 years old. Maternal and Child Health Care of China. **30**: 5095-8.
6. WHO (2019). Newborns: reducing mortality. <https://www.who.int/news-room/fact-sheets/detail/newborns-reducing-mortality> (accessed 12th Mar 2020).
7. Health Ministry of China. Health Statistical Yearbook of China, 1st edn. Beijing, China: Peking Union Medical College press, 2013:201.

- 451 8. National Working Committee on Children and Women under State Council. National Program for  
452 Women and Child Development. [http://www.nwccw.gov.cn/node\\_2427.htm](http://www.nwccw.gov.cn/node_2427.htm) (accessed 12th Mar 2020).
- 453 9. UN (2000). Millennium Development Goal. <http://www.un.org/zh/millenniumgoals/getinvolved.shtml>  
454 (accessed 12th Mar 2020).
- 455 10. Wang Y, Li X, Zhou M, et al. Under-5 mortality in 2851 Chinese counties, 1996-2012: a subnational  
456 assessment of achieving MDG 4 goals in China. *Lancet* 2016; **387**(10015): 273-83.
- 457 11. National Bureau of Statistics of China (2016). China statistical yearbook 2016.  
458 <http://www.stats.gov.cn/tjsj/ndsj/2016/indexch.htm> (accessed 12th Mar 2020).
- 459 12. Ministry of Foreign Affairs of China & UN China (2015). Report on China's Implementation of the  
460 Millennium Development Goals (2000-2015). [http://cn.chinagate.cn/reports/2015-07/28/content\\_36164105.htm](http://cn.chinagate.cn/reports/2015-07/28/content_36164105.htm) (accessed 12th Mar 2020).
- 461 13. Kuruvilla S, Schweitzer J, Bishai D, et al. Success factors for reducing maternal and child mortality.  
462 *Bull World Health Organ* 2014; **92**(7): 533-44b.
- 463 14. The development of China's Health Care and inhabitant's health status (2018) China Public Health  
464 Statistical Yearbook 2018. Peking Union Medical College Publishing House.
- 465 15. The World Bank. Mortality rate, neonatal (per 1,000 live births). 2019.  
466 <https://data.worldbank.org/indicator/SH.DYN.NMRT> (accessed Dec 11th 2020).
- 467 16. Wang Y, Zhu J, He C, Li X, Miao L, Liang J. Geographical disparities of infant mortality in rural China.  
468 *Arch Dis Child Fetal Neonatal Ed* 2012; **97**(4): F285-90.
- 469 17. He C, Liu L, Chu Y, et al. National and subnational all-cause and cause-specific child mortality in  
470 China, 1996-2015: a systematic analysis with implications for the Sustainable Development Goals. *Lancet*  
471 *Glob Health* 2017; **5**(2): e186-e97.
- 472 18. Lu R, Li X, Guo S, et al. Neonatal mortality in the urban and rural China between 1996 and 2013: a  
473 retrospective study. *Pediatr Res* 2016; **79**(5): 689-96.
- 474 19. Nichols EK, Byass P, Chandramohan D, et al. The WHO 2016 verbal autopsy instrument: An  
475 international standard suitable for automated analysis by InterVA, InSilicoVA, and Tariff 2.0. *PLoS Med*  
476 2018; **15**(1): e1002486.
- 477 20. Yaya S, Uthman OA, Okonofua F, Bishwajit G. Decomposing the rural-urban gap in the factors of  
478 under-five mortality in sub-Saharan Africa? Evidence from 35 countries. *BMC Public Health* 2019; **19**(1):  
479 616.
- 480 21. Saikia, N., Singh, A., Jasilionis, D., et al. Explaining the rural-urban gap in infant mortality in India.  
481 *Demographic Research*, 29(18), 473-506.
- 482 22. National health commission, National development and reform commission, the Ministry of Education,  
483 the Ministry of Finance, the Ministry of human resources and social security & National Administration of  
484 Traditional Chinese Medicine (NATCM) (2016). Circular on the issuance of opinions on strengthening the  
485 reform and development of children's medical and health services.  
486 [http://www.mohrss.gov.cn/SYrlzyhshbzb/shehuibaozhang/zcwj/yiliaoj/201606/t20160601\\_241098.html](http://www.mohrss.gov.cn/SYrlzyhshbzb/shehuibaozhang/zcwj/yiliaoj/201606/t20160601_241098.html)  
487 (accessed 2nd May 2020).
- 488 23. UNICEF (2012). Maternal and neonatal tetanus eliminated in China. <https://www.unicef.cn/en/press-releases/maternal-and-neonatal-tetanus-eliminated-china> (accessed 2nd May 2020).
- 489 24. Wang AL, Qiao YP, Wang LH, et al. Integrated prevention of mother-to-child transmission for human  
490

1  
2  
3  
4  
5  
6  
7  
8  
9  
10  
11  
12  
13  
14  
15  
16  
17  
18  
19  
20  
21  
22  
23  
24  
25  
26  
27  
28  
29  
30  
31  
32  
33  
34  
35  
36  
37  
38  
39  
40  
41  
42  
43  
44  
45  
46  
47  
48  
49  
50  
51  
52  
53  
54  
55  
56  
57  
58  
59  
60

immunodeficiency virus, syphilis and hepatitis B virus in China. *Bull World Health Organ* 2015; **93**(1): 52-6.

25. China CDC (2011) . Prevention of mother-to-child transmission of HIV, syphilis and hepatitis b (2011-2013). [http://www.chinacdc.cn/gwswww/fyzz/201107/t20110704\\_48397.html](http://www.chinacdc.cn/gwswww/fyzz/201107/t20110704_48397.html) (accessed 2nd May 2020).

26. Institute of party history and literature of the CPC central committee (2019). Memorabilia of the People's Republic of China (October 1949 -- September 2019) <http://cpc.people.com.cn/n1/2019/0928/c419242-31378078.html> (accessed 3rd May 2020).

27. Boghossian NS, Geraci M, Edwards EM, Horbar JD. Morbidity and Mortality in Small for Gestational Age Infants at 22 to 29 Weeks' Gestation. *Pediatrics* 2018; **141**(2).

28. Gee RE, Dickey RP, Xiong X, al. e. Impact of monozygotic twinning on multiple births resulting from in vitro fertilization in the United States, 2006-2010. *Am J Obstet Gynecol* 2014; **210**(5): 468.e1-6.

29. Imaizumi Y, Hayakawa K. Infant mortality among singletons and twins in Japan during 1999-2008 on the basis of risk factors. *Twin Res Hum Genet* 2013; **16**(2): 639-44.

30. Saleh Jafarian MA, Mahmoud Mobasher. The Effect of Twin Birth on Neonatal and Infant Mortality Rates: A Systematic Review. *International Journal of Epidemiologic Research* 2018; **Summer 5**(3): 113-8.

31. Monden CWS, Smits J. Mortality among twins and singletons in sub-Saharan Africa between 1995 and 2014: a pooled analysis of data from 90 Demographic and Health Surveys in 30 countries. *Lancet Glob Health* 2017; **5**(7): e673-e9.

32. Liang J, Mao M, Dai L, et al. Neonatal mortality due to preterm birth at 28-36 weeks' gestation in China, 2003-2008. *Paediatr Perinat Epidemiol* 2011; **25**(6): 593-600.

33. National Bureau of Statistics of China. Personal income and consumer spending in 2018. 2019. [http://www.stats.gov.cn/tjsj/zxfb/201901/t20190121\\_1645791.html](http://www.stats.gov.cn/tjsj/zxfb/201901/t20190121_1645791.html).

34. National Health Commission of China. China Health Statistics Yearbook 2019. Beijing, 2020.

35. World Health Organization, Dept. of Reproductive Health and Research; United Nations Population Fund; UNICEF (2003). Managing newborn problems: A guide for doctors, nurses and midwives.

36. Bryce J, Boschi-Pinto C, Shibuya K, et al. WHO estimates of the causes of death in children. *Lancet*. 2005;365(9465):1147-1152.

37. The National Health Commission of China (2017). Guidelines for the Construction and Management of Critical Neonatal Treatment Center. <http://www.nhc.gov.cn/fys/s3581/201801/1048948966a44067974a44187c6a8912.shtml> (accessed 28th Apr 2020).

38. Matsumoto Y, Nakai A, Nishijima Y, et al. Absence of neonatal intensive care units in secondary medical care zones is an independent risk factor of high perinatal mortality in Japan. *J Obstet Gynaecol Res* 2016; **42**(10): 1304-9.

39. Neonatal Physician Branch of Chinese Physician Association (2013). Guidelines for graded construction and management of neonatal wards in China (proposal). *Chin J Appl Clin Pediatr*, February, 28(3). 231-239.

40. Office of the central leading group for financial and economic affairs of China (2006). Five mechanisms of the new socialist countryside. <http://finance.people.com.cn/GB/1037/4132493.html> (accessed 2nd May 2020).

41. Zhou Y, Guo, Y.,Liu, Y, et al. . Targeted poverty alleviation and land policy innovation: Some practice

533 and policy implications from China. Land Use Policy, 74(74), 53-65.

534

535

536

537

538

539

540

541

542

543

544 Figure 1. The national and urban-rural neonatal mortality rates (per 1,000 live births) in  
545 China between 2014 and 2018

546 Figure 2A. Causes of deaths in neonates in China, 2018

547 Figure 2B. Causes of deaths in neonates in urban China, 2018

548 Figure 2C. Causes of deaths in neonates in rural China, 2018

549 Figure 3. The proportion of neonatal diagnose level in China from 2014 to 2018

550

1  
2  
3  
4  
5  
6  
7  
8  
9  
10  
11  
12  
13  
14  
15  
16  
17  
18  
19  
20  
21  
22  
23  
24  
25  
26  
27  
28  
29  
30  
31  
32  
33  
34  
35  
36  
37  
38  
39  
40  
41  
42  
43  
44  
45  
46  
47  
48  
49  
50  
51  
52  
53  
54  
55  
56  
57  
58  
59  
60

551

For peer review only

Figure 1. The national and urban–rural neonatal mortality rates (per 1,000 live births) in China between 2014 and 2018

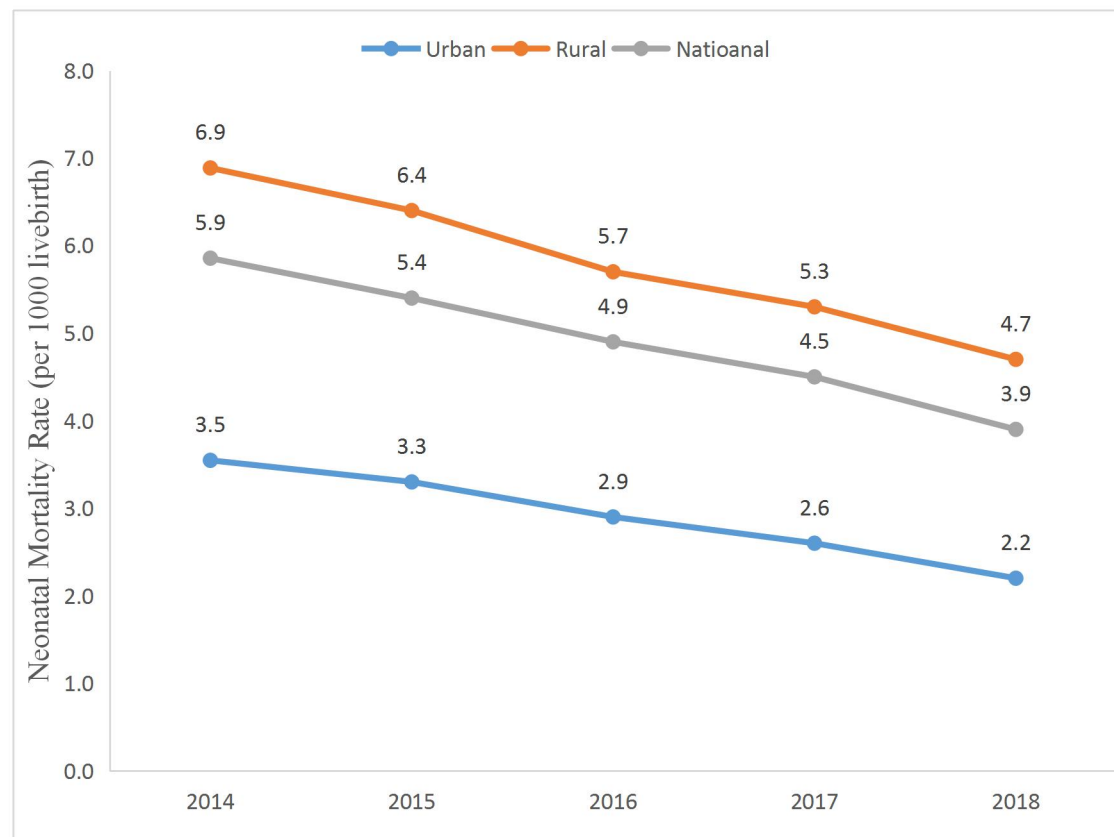

Figure 3. The proportion of neonatal diagnose level in China from 2014 to 2018

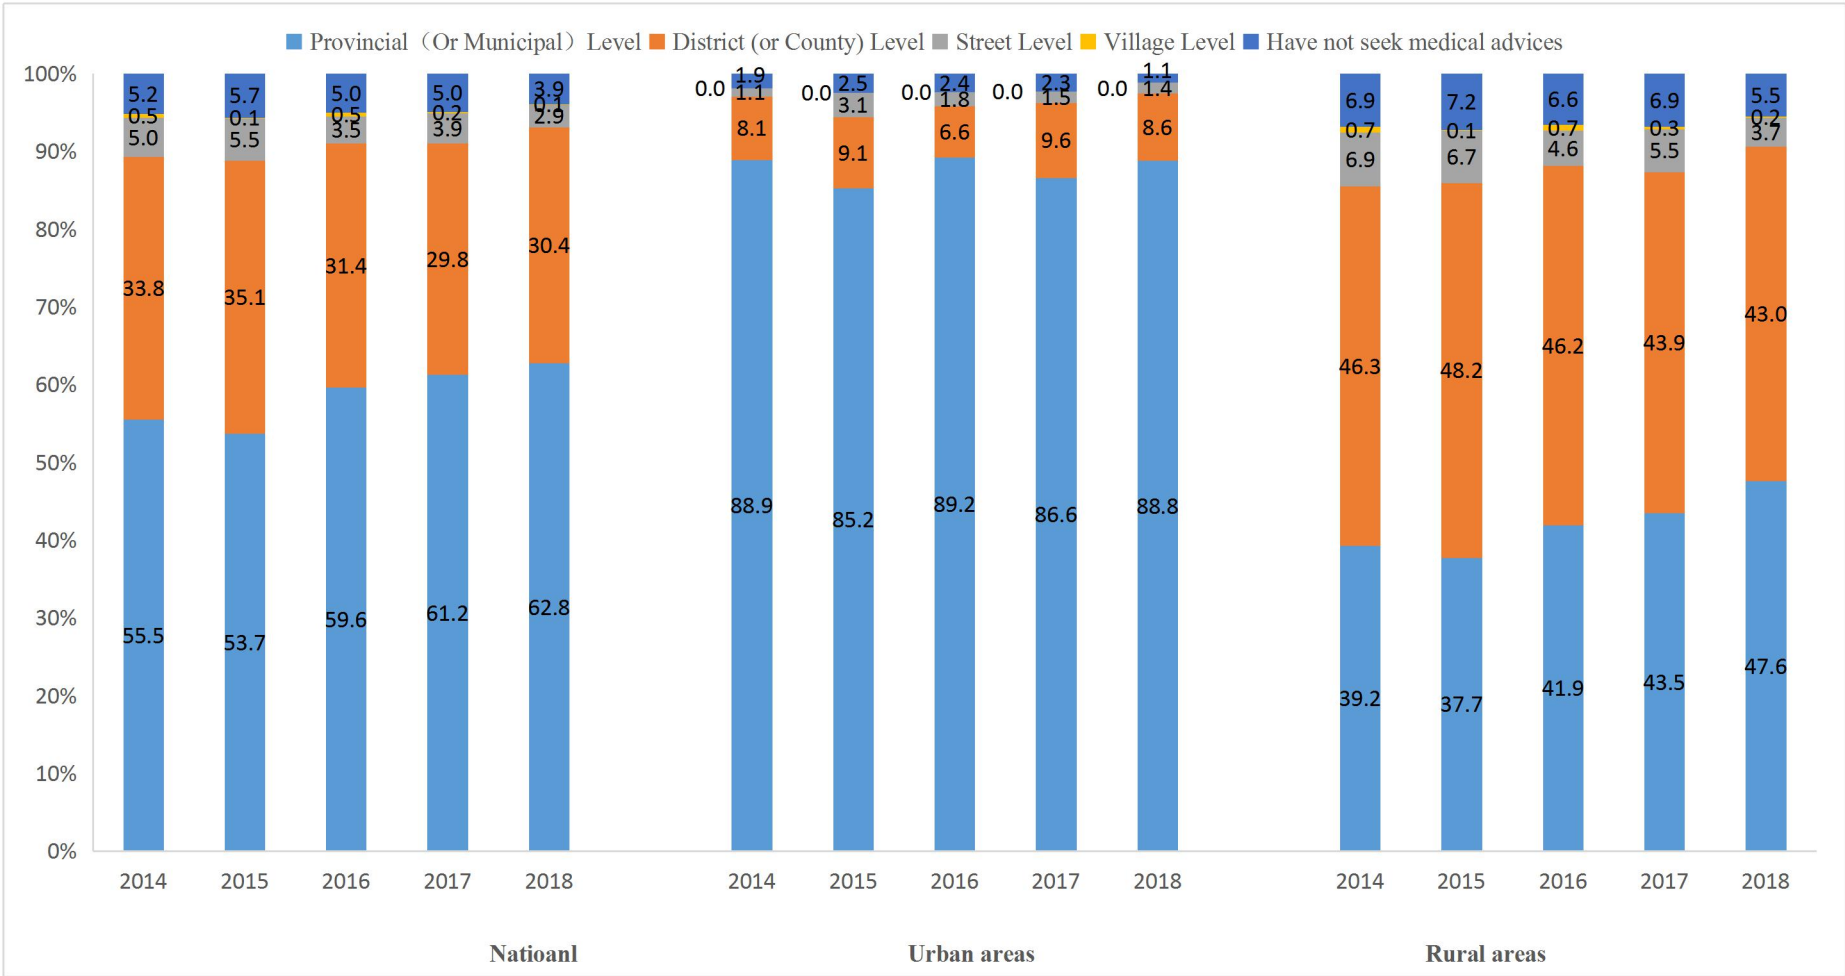

Figure 2A. Causes of deaths in neonates in China, 2018

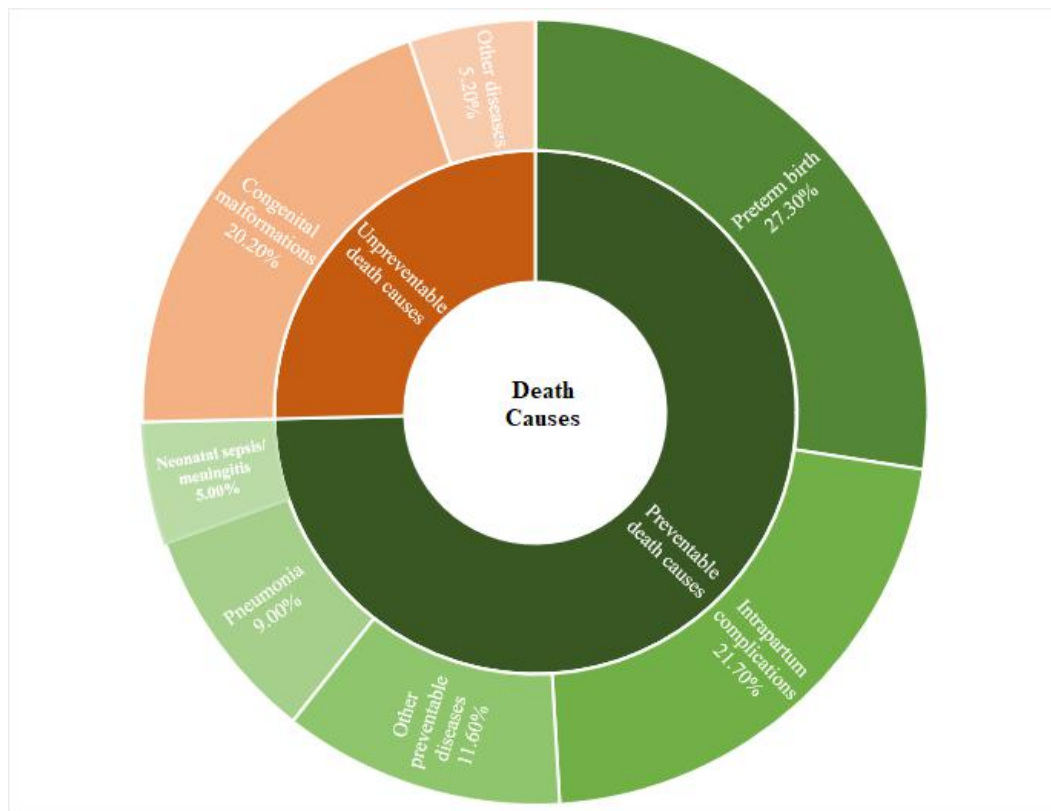

Figure 2B. Causes of deaths in neonates in urban China, 2018

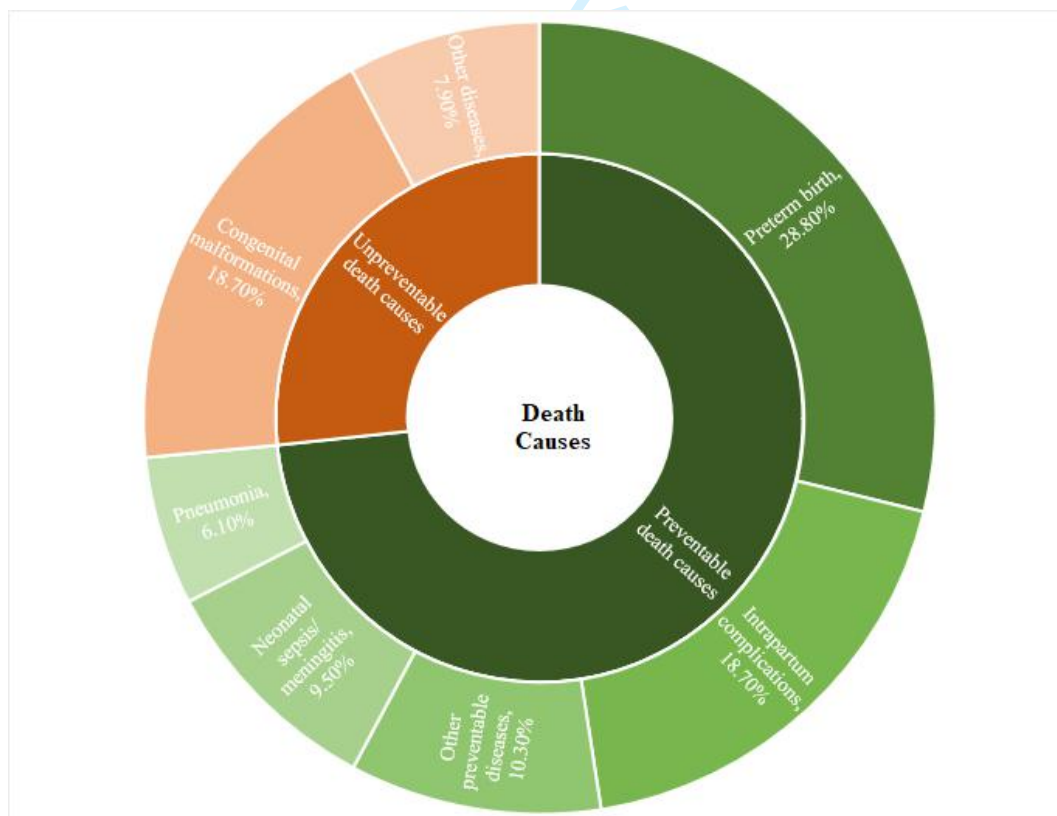

Figure 2C. Causes of deaths in neonates in rural China, 2018

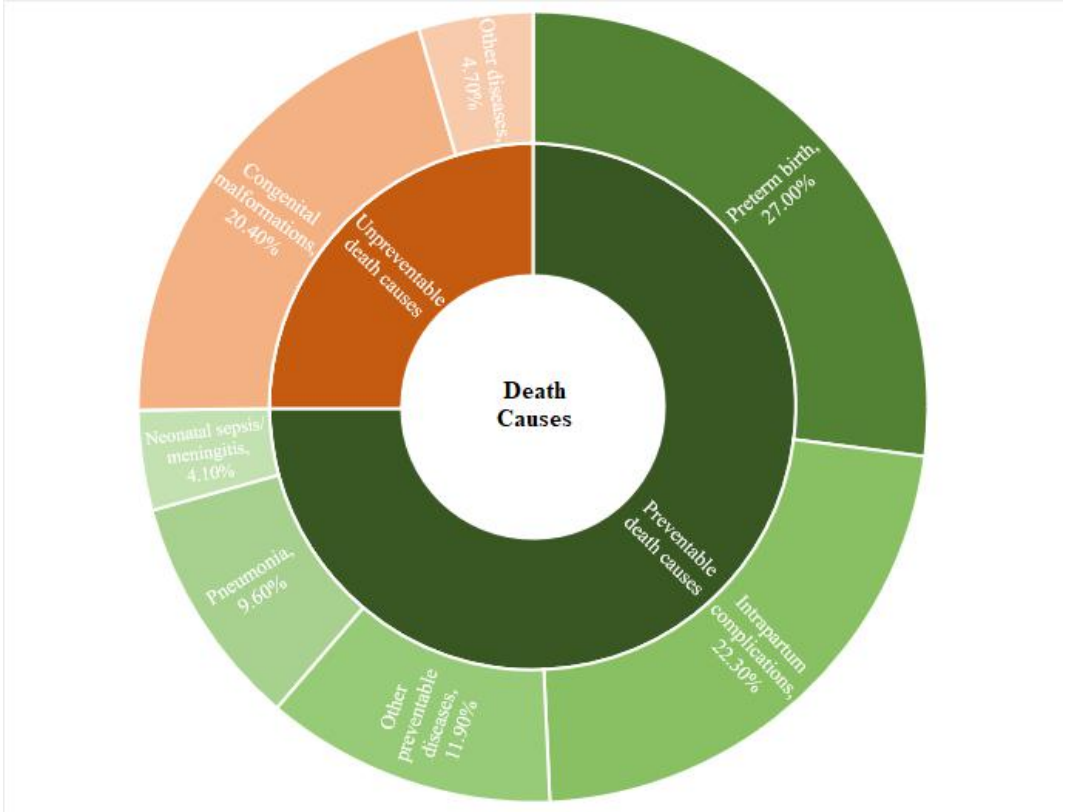

# BMJ Open

## Neonatal mortality and leading causes of deaths: a descriptive study in China, 2014-2018

|                                 |                                                                                                                                                                                                                                                                                                                                                                                                                                                                                                                                                                                                                                                                                                                                                                                                                                                                                                                                                                                                                                                                                                                                                                                                                                                                                                                                                                                                                                                                                                                                                                                                                                                                                         |
|---------------------------------|-----------------------------------------------------------------------------------------------------------------------------------------------------------------------------------------------------------------------------------------------------------------------------------------------------------------------------------------------------------------------------------------------------------------------------------------------------------------------------------------------------------------------------------------------------------------------------------------------------------------------------------------------------------------------------------------------------------------------------------------------------------------------------------------------------------------------------------------------------------------------------------------------------------------------------------------------------------------------------------------------------------------------------------------------------------------------------------------------------------------------------------------------------------------------------------------------------------------------------------------------------------------------------------------------------------------------------------------------------------------------------------------------------------------------------------------------------------------------------------------------------------------------------------------------------------------------------------------------------------------------------------------------------------------------------------------|
| Journal:                        | <i>BMJ Open</i>                                                                                                                                                                                                                                                                                                                                                                                                                                                                                                                                                                                                                                                                                                                                                                                                                                                                                                                                                                                                                                                                                                                                                                                                                                                                                                                                                                                                                                                                                                                                                                                                                                                                         |
| Manuscript ID                   | bmjopen-2020-042654.R2                                                                                                                                                                                                                                                                                                                                                                                                                                                                                                                                                                                                                                                                                                                                                                                                                                                                                                                                                                                                                                                                                                                                                                                                                                                                                                                                                                                                                                                                                                                                                                                                                                                                  |
| Article Type:                   | Original research                                                                                                                                                                                                                                                                                                                                                                                                                                                                                                                                                                                                                                                                                                                                                                                                                                                                                                                                                                                                                                                                                                                                                                                                                                                                                                                                                                                                                                                                                                                                                                                                                                                                       |
| Date Submitted by the Author:   | 19-Jan-2021                                                                                                                                                                                                                                                                                                                                                                                                                                                                                                                                                                                                                                                                                                                                                                                                                                                                                                                                                                                                                                                                                                                                                                                                                                                                                                                                                                                                                                                                                                                                                                                                                                                                             |
| Complete List of Authors:       | Liu, Yuxi; Sichuan University West China Second University Hospital, National Office for Maternal and Child Health Surveillance of China<br>Kang, Leni; Sichuan University West China Second University Hospital, National Office for Maternal and Child Health Surveillance of China<br>He, Chunhua; Sichuan University West China Second University Hospital, National Office for Maternal and Child Health Surveillance of China<br>Miao, Lei; Sichuan University West China Second University Hospital, National Office for Maternal and Child Health Surveillance of China<br>Qiu, Xiaoqiong; Pidun district people's hospital, Chengdu, Sichuan<br>Xia, Weipeng; Second People's Hospital of Zhaotong, Zhaotong, Yunnan, Department of Pediatrics<br>Zhu, Jun; Sichuan University West China Second University Hospital, Key Laboratory of Birth Defects and Related Diseases of Women and Children of the Ministry of Education, West China Second University Hospital, Sichuan University, Chengdu, China; Sichuan University West China Second University Hospital, National Office for Maternal and Child Health Surveillance of China<br>Liang, Juan; Sichuan University West China Second University Hospital, National Office for Maternal and Child Health Surveillance of China<br>Li, Qi; Sichuan University West China Second University Hospital, National Office for Maternal and Child Health Surveillance of China<br>Wang, Yanping; Sichuan University West China Second University Hospital, National Office for Maternal and Child Health Surveillance of China<br>Liu, Min; Sichuan University West China Second University Hospital, Department of Pediatrics |
| <b>Primary Subject Heading</b>: | Public health                                                                                                                                                                                                                                                                                                                                                                                                                                                                                                                                                                                                                                                                                                                                                                                                                                                                                                                                                                                                                                                                                                                                                                                                                                                                                                                                                                                                                                                                                                                                                                                                                                                                           |
| Secondary Subject Heading:      | Epidemiology, Public health                                                                                                                                                                                                                                                                                                                                                                                                                                                                                                                                                                                                                                                                                                                                                                                                                                                                                                                                                                                                                                                                                                                                                                                                                                                                                                                                                                                                                                                                                                                                                                                                                                                             |
| Keywords:                       | PUBLIC HEALTH, EPIDEMIOLOGY, NEONATOLOGY                                                                                                                                                                                                                                                                                                                                                                                                                                                                                                                                                                                                                                                                                                                                                                                                                                                                                                                                                                                                                                                                                                                                                                                                                                                                                                                                                                                                                                                                                                                                                                                                                                                |
|                                 |                                                                                                                                                                                                                                                                                                                                                                                                                                                                                                                                                                                                                                                                                                                                                                                                                                                                                                                                                                                                                                                                                                                                                                                                                                                                                                                                                                                                                                                                                                                                                                                                                                                                                         |

SCHOLARONE™  
Manuscripts

1  
2  
3  
4  
5  
6  
7  
8  
9  
10  
11  
12  
13  
14  
15  
16  
17  
18  
19  
20  
21  
22  
23  
24  
25  
26  
27  
28  
29  
30  
31  
32  
33  
34  
35  
36  
37  
38  
39  
40  
41  
42  
43  
44  
45  
46  
47  
48  
49  
50  
51  
52  
53  
54  
55  
56  
57  
58  
59  
60

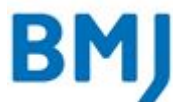

I, the Submitting Author has the right to grant and does grant on behalf of all authors of the Work (as defined in the below author licence), an exclusive licence and/or a non-exclusive licence for contributions from authors who are: i) UK Crown employees; ii) where BMJ has agreed a CC-BY licence shall apply, and/or iii) in accordance with the terms applicable for US Federal Government officers or employees acting as part of their official duties; on a worldwide, perpetual, irrevocable, royalty-free basis to BMJ Publishing Group Ltd ("BMJ") its licensees and where the relevant Journal is co-owned by BMJ to the co-owners of the Journal, to publish the Work in this journal and any other BMJ products and to exploit all rights, as set out in our [licence](#).

The Submitting Author accepts and understands that any supply made under these terms is made by BMJ to the Submitting Author unless you are acting as an employee on behalf of your employer or a postgraduate student of an affiliated institution which is paying any applicable article publishing charge ("APC") for Open Access articles. Where the Submitting Author wishes to make the Work available on an Open Access basis (and intends to pay the relevant APC), the terms of reuse of such Open Access shall be governed by a Creative Commons licence – details of these licences and which [Creative Commons](#) licence will apply to this Work are set out in our licence referred to above.

Other than as permitted in any relevant BMJ Author's Self Archiving Policies, I confirm this Work has not been accepted for publication elsewhere, is not being considered for publication elsewhere and does not duplicate material already published. I confirm all authors consent to publication of this Work and authorise the granting of this licence.

## 2 2018

4 Yuxi Liu, MPH, MHM<sup>a</sup>; Leni Kang, PhD<sup>a</sup>; Chunhua He, MD<sup>a</sup>; Lei Miao, MD<sup>a</sup>; Xiaoqiong  
5 Qiu, MD<sup>d</sup>; Weipeng Xia, MD<sup>e</sup>; Jun Zhu, MD<sup>a,c</sup>; Juan Liang, MD<sup>a</sup>; Qi Li, MD<sup>a</sup>; Yanping  
6 Wang, MD<sup>a,▲</sup>; Hanmin Liu, PhD<sup>b,c,▲</sup>.

8 <sup>a</sup> National Office for Maternal and Child Health Surveillance of China, West China Second  
9 University Hospital, Sichuan University, Chengdu, Sichuan, China

<sup>b</sup> Department of Pediatrics, West China Second University Hospital, Sichuan University,  
Chengdu, China

12    <sup>c</sup> Key Laboratory of Birth Defects and Related Diseases of Women and Children of the  
13    Ministry of Education, West China Second University Hospital, Sichuan University,  
14    Chengdu, China

15 <sup>d</sup> Pidū district people's hospital, Chengdu, Sichuan, China

16   <sup>e</sup> Department of Pediatrics, Second People's Hospital of Zhaotong, Zhaotong, Yunnan,  
17   China

18

19

20 ▲ These authors contributed equally to this work.

21

22 **Corresponding authors:** Yanping Wang, National Office for Maternal and Child Health  
23 Surveillance of China, West China Second University Hospital, Sichuan University,  
24 Chengdu, Sichuan, China, email: wyxianping@163.com; and Hanmin Liu; Department of  
25 Pediatrics, West China Second University Hospital, Sichuan University, Chengdu, China,  
26 email: hanmin@vip.163.com

27

28

29

30

31

32

33

1  
2  
3  
4 34  
5  
6  
7 35  
8  
9  
10  
11 36  
12  
13  
14 37  
15  
16  
17  
18 38  
19  
20  
21 39  
22  
23  
24  
25 40  
26  
27  
28 41  
29  
30  
31 42  
32  
33

34  
35 **Abstract**  
36

37  
38 44 **Objective:** The present study estimated the national and urban-rural levels and causes of  
39  
40 45 neonatal deaths in China annually between 2014 and 2018 to provide data support for the  
41  
42 46 further end of preventable neonatal deaths for China and other low-and middle-income  
43  
44 47 countries.  
45  
46

47  
48 48 **Methods:** The study was based on data from the National Maternal and Child Health  
49  
50 49 Surveillance System (NMCHSS). All neonates of surveillance districts (gestational week  
51  
52 50  $\geq 28$  weeks) who died after delivery have been involved in the study. The mortality rate and  
53  
54

the leading causes of death for neonates were analyzed.

**Results:** The NMR (Neonatal Mortality Rate) of China has steadily decreased from 5.9 deaths per 1000 live births in 2014 to 3.9 deaths per 1000 live births in 2018. The NMR in 2018 of urban and rural areas was 2.2 deaths per 1000 live births and 4.7 deaths per 1000 live births, respectively. The leading preventable causes of neonatal deaths are the same in the urban and rural areas were same, which were preterm birth, intrapartum complications, and pneumonia. Mortality rates of these three causes fell significantly between 2014 and 2018 but contributed to a higher proportion of deaths in rural areas than urban areas. The proportion of preventable deaths accounted for 73.9% in 2018.

**Conclusions:** The NMR of China has decreased steadily from 2014 to 2018. However, the inequality between urban and rural areas still exists. The goal of government interventions should be to reduce the health inequality of neonates and further take targeted measures to eliminate preventable neonatal death.

**Keywords:** neonatal mortality, leading cause, Surveillance, inequality, China

## Strengths and limitations of this study

- This is the first study to show the status of neonatal deaths in China from 2014 to 2018.

1  
2  
3  
4  
5  
6  
7  
8  
9  
10  
11  
12  
13  
14  
15  
16  
17  
18  
19  
20  
21  
22  
23  
24  
25  
26  
27  
28  
29  
30  
31  
32  
33  
34  
35  
36  
37  
38  
39  
40  
41  
42  
43  
44  
45  
46  
47  
48  
49  
50  
51  
52  
53  
54  
55  
56  
57  
58  
59  
60

- 68 • The study covers the most geographically extensive newborn population in mainland
- 69 China.
- 70 • The data from the National Maternal and Child Health Surveillance System used in this
- 71 study have been shown to be representative of mainland China and to be of high quality
- 72 for the recording of death causes of children under 5.
- 73 • The system has not covered the pre-natal assessment due to design limitations.

81 **Introduction**

82 In 2015, the United Nations (UN) summit on sustainable development formally adopted

83 the 2030 agenda for sustainable development. In the Sustainable Development Goals 3

(SDGs3), the goal is to end preventable neonatal and under-five child deaths by 2030<sup>1</sup>, with all countries aiming to reduce neonatal mortality to at least as low as 12 deaths per 1,000 live births and under-five mortality to at least as low as 25 deaths per 1,000 live births. The importance of newborn health issues has received global attention. The Chinese government has always attached great importance to the survival, protection, and development of children, and has made great achievements in reducing child mortality. Professional institutions for maternal and child health care began to be established in 1950<sup>2</sup>. Moreover, the Chinese government has taken the under-five mortality rate (U5MR), the infant mortality rate (IMR), and other indicators of children's health as assessment targets for provincial governments, and has promulgated the National Program of Action for Child Development in China every decade since 1990s<sup>2,3</sup>.

Globally, there were 5.3 million deaths occurred on children under 5 in 2018, 47% of them died during their first month of life. The vast majority of neonatal deaths occur in low - and middle-income countries. Approximately 73,000 neonates died in China in 2018, accounting for about 3.0% of the total newborn deaths worldwide, ranking sixth in the world<sup>4</sup>. Moreover, the global decline in neonatal mortality rate (NMR) has been slower than the decline in the U5MR<sup>5</sup>. Global U5MR declined from 93 per 1,000 live births in 1990 to 39 per 1,000 live births in 2018, while that of NMR only declined from 37 per

1  
2  
3  
4  
5  
6  
7  
8  
9  
10  
11  
12  
13  
14  
15  
16  
17  
18  
19  
20  
21  
22  
23  
24  
25  
26  
27  
28  
29  
30  
31  
32  
33  
34  
35  
36  
37  
38  
39  
40  
41  
42  
43  
44  
45  
46  
47  
48  
49  
50  
51  
52  
53  
54  
55  
56  
57  
58  
59  
60

1,000 live births to 18 per 1,000 live births during the same period. Additionally, a great many studies have shown that neonatal deaths amounting to a large proportion of total mortality of children under 5<sup>5-7</sup>. Therefore, reducing preventable neonatal deaths is important to further reduce the U5MR.

China has achieved the MDG4 (Millennium Development Goal 4) eight years ahead of schedule in 2007<sup>8-13</sup>, and it is also rated by the World Health Organization as a country with "high performance in maternal and child health". In 2018, the NMR of China was 3.9 deaths per 1000 live births, which was lower than the target of SDG3<sup>14</sup>. However, according to the NMR data from World Bank in 2018, the NMR of China is at a low level in developing countries (such as the NMR in Brazil was 8.1 deaths per 1000 live births, and Thailand was 5.0 deaths per 1000 live births), it still lags behind that in developed countries (such as the NMR in Australia was 2.3 deaths per 1000 live births, and Germany was 2.2 deaths per 1000 live births)<sup>15</sup>. Moreover, since urban areas generally have better economic development than rural areas, resulting in better health service infrastructure and health service infrastructures<sup>16</sup>, there is an urban-rural inequity in neonatal mortality in China<sup>17</sup>. To further shorten the gap with developed countries, and reduce the difference in neonatal mortality between urban and rural areas, there is still room for improvement in neonatal deaths in China. This study will analyze neonatal mortality trends and its mortality

122 of major causes of death in China from 2014 to 2018 to provide data support for the further  
123 elimination of key preventable diseases that can cause neonatal deaths.

124

## 125 **Materials and Methods**

### 126 *Study subjects*

127

128 The study covered all the 327 districts of the National Maternal and Child Health  
129 Surveillance Districts (with 124 urban districts and 203 rural districts) in 31 provinces,  
130 autonomous regions, and municipalities of China. Further details about the National  
131 Maternal and Child Health Surveillance System (NMCHSS) have been described  
132 elsewhere<sup>18</sup>.

133

134 All neonates of surveillance districts (gestational week  $\geq 28$  weeks) who died after delivery,  
135 and had one of the four vital signs would be involved in surveillance subject, including  
136 heartbeat, breath, umbilical cord pulsation, and voluntary muscle contraction. The  
137 surveillance subject also includes adoption children and children of non-local household  
138 residents whose mothers have living in the surveillance districts for more than one year.

1  
2  
3  
4  
5  
6  
7  
8  
9  
10  
11  
12  
13  
14  
15  
16  
17  
18  
19  
20  
21  
22  
23  
24  
25  
26  
27  
28  
29  
30  
31  
32  
33  
34  
35  
36  
37  
38  
39  
40  
41  
42  
43  
44  
45  
46  
47  
48  
49  
50  
51  
52  
53  
54  
55  
56  
57  
58  
59  
60

139

140 *Data collection and quality control*

141 After each child died in the surveillance districts, the local village doctor (or community  
142 doctor) needs to report to the local township health centers (or community health service  
143 centers) within 10 days. Local township health centers (or community health service  
144 centers) need to be verified within 7 days after reporting and fill the Child Death Report  
145 Card based on the hospital's death diagnosis. If the child died at home or on the way to the  
146 health facilities, infer the cause of death would base on the 2016 WHO Verbal Autopsy  
147 Standards<sup>19</sup> and then fill the Child Death Report Card. The classification of diseases  
148 according to the international classification of diseases-10 (ICD-10).

149

150 The children's mortality data was reported level by level, and the data is timely reported  
151 through the network direct reporting system. Technical personnel responsible for  
152 monitoring work are set up at all levels to complete the collection, review, and operation  
153 of surveillance data. The completed child death data would send to the county (or district)  
154 level maternal and child health institutions each season. The county (or district) level  
155 maternal and child health institutions would report the local child deaths status to  
156 prefecture-level and province-level maternal and child health institutions each season, the

1  
2  
3  
4 157 National Office of Maternal and Child Health would summarize and analyzes the data  
5  
6 158 finally.  
7  
8  
9

10 159

11  
12  
13 160 For quality control, we have used the regular level-by-level on-site quality control system.  
14  
15 161 At the county (district), city, and provincial levels, following the requirements of the  
16  
17  
18 162 Chinese Maternal and Child Health Surveillance Work Manual, a multi-source data cross-  
19  
20  
21 163 check method is used to complete the on-site quality control work in sampling surveillance  
22  
23  
24 164 districts. The National Office of Maternal and Child Health will select 18 districts in 6  
25  
26 165 provinces each year for quality inspection<sup>17,18</sup>.  
27  
28  
29  
30

31 166

32  
33 167 *Statistical analysis*  
34  
35

36 168 Results were collected in Microsoft Excel and analyzed using SPSS 22.0 (IBM, Armonk,  
37  
38 169 NY, USA). The neonatal mortality rates (NMR) of different areas (urban areas & rural  
39  
40  
41 170 areas) and stages (early neonates & late neonates), and the main cause-specific mortality  
42  
43  
44 171 rates were corrected using the average underreporting rate of the national-level surveillance  
45  
46 172 data quality checks in the past three years. The national NMR and the main cause-specific  
47  
48  
49 173 mortality rate were weighted calculated according to the proportion of the urban and rural  
50  
51  
52 174 population in the census. The diagnostic level composition ratio of the neonate is calculated  
53  
54  
55  
56  
57  
58  
59  
60

1  
2  
3  
4  
5  
6  
7  
8  
9  
10  
11  
12  
13  
14  
15  
16  
17  
18  
19  
20  
21  
22  
23  
24  
25  
26  
27  
28  
29  
30  
31  
32  
33  
34  
35  
36  
37  
38  
39  
40  
41  
42  
43  
44  
45  
46  
47  
48  
49  
50  
51  
52  
53  
54  
55  
56  
57  
58  
59  
60

175 based on the reported Child Death Report Card, excluding children who died of accidental  
176 injuries<sup>17</sup>.

177  
178 The Poisson regression model was used to calculate the average annual rate of decline of  
179 NMR, cause-of-death mortality, and its 95% confidence interval in the country, urban and  
180 rural areas, and its 95% confidence interval in early and late neonates, respectively. Linear  
181 by the linear association in the chi-square test using SPSS software was used to test whether  
182 there was a linear downward trend in different regions and causes of death.

183  
184 *Ethics approval and consent to participate*

185 This study was approved by the Ethics Committee of West China Second University  
186 Hospital, Sichuan University, China.

187  
188 *Patient and public involvement*

189 Patients and members of the public were not involved in the design of this study.

190  
191 **Result**

1  
2  
3  
4 192 *1. The NMR of China from 2014 to 2018*

5  
6  
7 193 At the national level, the NMR of China has steadily decreased from 5.9 deaths per 1000  
8  
9  
10 194 live births in 2014 to 3.9 deaths per 1000 live births in 2018 ( $p<0.001$ ), the average  
11  
12 195 annual rate of decline was 10.7%. The NMR of urban and rural areas have both showed a  
13  
14  
15 196 declining trend in the same period ( $p<0.001$ ). The mortality rate of urban areas  
16  
17 197 decreased from 3.5 deaths per 1000 live births to 2.2 deaths per 1000 live births, with the  
18  
19  
20 198 average annual rate of decline was 13.0%. In rural areas, the NMR decreased significantly  
21  
22 199 from 2014 to 2018 (6.9 deaths per 1000 live births to 4.7 deaths per 1000 live births, the  
23  
24 200 average annual rate of decline was 10.6%,  $p<0.001$ ). The absolute difference between  
25  
26  
27 201 NMR of urban and rural areas has reduced from 3.4 deaths per 1000 live births to 2.5 deaths  
28  
29 202 per 1000 live births, but the relative difference has increased from 2.0 to 2.2. (See **Figure**  
30  
31  
32  
33 203 **1**)

34  
35  
36  
37 204  
38  
39  
40 205 *2. Cause of neonates mortality in China from 2014 to 2018*

41  
42  
43 206 Nationwide, compared with 2014, the neonatal deaths caused due to preterm birth,  
44  
45 207 intrapartum complication, and pneumonia in 2018 have sharply decreased. Among the  
46  
47  
48 208 particular diseases, the intrapartum complications have the highest average annual decline  
49  
50  
51 209 rate (AADR) from 2014 to 2018 (with 13.5%,  $p<0.001$ ). The smallest AADR belonged to  
52  
53  
54 210 Tetanus (with 0.8%,  $p<0.05$ ). In any given year, preterm birth, intrapartum complication,

1  
2  
3  
4  
5  
6  
7  
8  
9  
10  
11  
12  
13  
14  
15  
16  
17  
18  
19  
20  
21  
22  
23  
24  
25  
26  
27  
28  
29  
30  
31  
32  
33  
34  
35  
36  
37  
38  
39  
40  
41  
42  
43  
44  
45  
46  
47  
48  
49  
50  
51  
52  
53  
54  
55  
56  
57  
58  
59  
60

and pneumonia were the top three leading causes of neonatal death in China, total accounting for nearly 60%. (See **Table 1**) In 2018, all deaths causes have been divided into preventable diseases and unpreventable diseases to analyze the proportion. The proportion of preventable diseases reached 73.9%. Moreover, the top three diseases at the national level were preterm birth, intrapartum complications, and congenital malformations. (See **Figure 2A**)

217 Table 1. The proportion of cause-specific neonatal mortality in China from 2014 to 2018

| Causes of death            | 0-6 days |      |      |      |      | 7-28 days |      |      |      |      | 0-28 days |      |      |      |      |
|----------------------------|----------|------|------|------|------|-----------|------|------|------|------|-----------|------|------|------|------|
|                            | 2014     | 2015 | 2016 | 2017 | 2018 | 2014      | 2015 | 2016 | 2017 | 2018 | 2014      | 2015 | 2016 | 2017 | 2018 |
| <b>Nationalwide</b>        |          |      |      |      |      |           |      |      |      |      |           |      |      |      |      |
| Preterm birth              | 32.3     | 33.1 | 32.0 | 36.2 | 26.7 | 19        | 24.2 | 19.9 | 22.3 | 28.8 | 29.1      | 30.8 | 28.7 | 32.2 | 27.3 |
| Intrapartum complications  | 29.0     | 31.9 | 27.0 | 26.4 | 28.5 | 8.4       | 7.1  | 6    | 6.2  | 5.6  | 24.2      | 25.5 | 21.4 | 20.6 | 21.7 |
| Pneumonia                  | 9.5      | 6.9  | 9.0  | 8.0  | 7.9  | 17.3      | 13.5 | 18   | 18.2 | 11.5 | 11.3      | 8.6  | 11.4 | 11   | 9    |
| Diarrhea                   | 0.1      | 0.0  | 0.0  | 0.0  | 0.2  | 1.3       | 2    | 1.1  | 0.2  | 1    | 0.4       | 0.5  | 0.3  | 0    | 0.4  |
| Tetanus                    | 0.0      | 0.0  | 0.0  | 0.0  | 0.0  | 0.6       | 0.0  | 0.0  | 0.0  | 0.0  | 0.1       | 0    | 0    | 0    | 0    |
| HIV                        | 0.0      | 0.0  | 0.0  | 0.0  | 0.0  | 0.0       | 0.0  | 0.0  | 0.0  | 0.0  | 0         | 0    | 0    | 0    | 0    |
| Neonatal sepsis/meningitis | 1.6      | 2.1  | 2.7  | 2.4  | 3.0  | 5.3       | 4.3  | 7.5  | 5.8  | 9.8  | 2.5       | 2.6  | 4    | 3.3  | 5    |
| Other infectious diseases  | 0.3      | 0.3  | 0.2  | 0.3  | 0.0  | 0.3       | 0.0  | 0.4  | 0.0  | 0.0  | 0.3       | 0.2  | 0.3  | 0.2  | 0    |
| Congenital                 | 15.5     | 12.5 | 16.1 | 16.7 | 19.0 | 23.4      | 22.8 | 26.4 | 22.7 | 22.8 | 17.4      | 15.2 | 18.9 | 18.5 | 20.2 |

|                            |      |      |      |      |      |      |      |      |      |      |      |      |      |      |      |
|----------------------------|------|------|------|------|------|------|------|------|------|------|------|------|------|------|------|
| malformations              |      |      |      |      |      |      |      |      |      |      |      |      |      |      |      |
| Other diseases             | 11.7 | 13.2 | 12.9 | 9.9  | 14.7 | 24.4 | 26.1 | 20.7 | 24.6 | 20.5 | 14.7 | 16.6 | 15   | 14.2 | 16.4 |
| <b>Urban area</b>          |      |      |      |      |      |      |      |      |      |      |      |      |      |      |      |
| Preterm birth              | 35.5 | 30   | 26.6 | 36.5 | 29.1 | 15.5 | 24.6 | 22.8 | 19.8 | 27.9 | 31.4 | 28.6 | 25.5 | 31.8 | 28.8 |
| Intrapartum complications  | 28   | 30   | 28.2 | 27.8 | 24.3 | 18.1 | 10.4 | 5.5  | 11.2 | 6.4  | 25.9 | 24.6 | 21.8 | 23.2 | 18.7 |
| Pneumonia                  | 7.3  | 7.9  | 10.7 | 6.4  | 5.3  | 11.3 | 8.2  | 15.1 | 14.5 | 8.1  | 8.1  | 8    | 12   | 8.6  | 6.1  |
| Diarrhea                   | 0.0  | 0.0  | 0.0  | 0.0  | 0.0  | 0.8  | 0.8  | 0.0  | 0.7  | 0.9  | 0.2  | 0.2  | 0    | 0.2  | 0.3  |
| Tetanus                    | 0.0  | 0.0  | 0.0  | 0.0  | 0.0  | 0.0  | 0.0  | 0.0  | 0.0  | 0.0  | 0    | 0    | 0    | 0    | 0    |
| HIV                        | 0.0  | 0.0  | 0.0  | 0.0  | 0.0  | 0.0  | 0.0  | 0.0  | 0.0  | 0.0  | 0    | 0    | 0    | 0    | 0    |
| Neonatal sepsis/meningitis | 2.7  | 2.5  | 4.7  | 4.3  | 8.1  | 3.4  | 7.5  | 8.3  | 12.4 | 12.6 | 2.9  | 3.9  | 5.7  | 6.6  | 9.5  |
| Other infectious diseases  | 0.7  | 0.9  | 0.5  | 0.8  | 0.0  | 0.0  | 0.0  | 0.7  | 0.0  | 0    | 0.5  | 0.6  | 0.6  | 0.5  | 0    |
| Congenital malformations   | 17.3 | 16.4 | 17.8 | 16.3 | 15.4 | 32.8 | 28.4 | 24.2 | 20.4 | 26.2 | 20.5 | 19.7 | 19.6 | 17.5 | 18.7 |

|                            |      |      |      |      |      |      |      |      |      |      |      |      |      |      |      |
|----------------------------|------|------|------|------|------|------|------|------|------|------|------|------|------|------|------|
| Other diseases             | 8.4  | 12.2 | 11.5 | 7.9  | 17.8 | 18.1 | 20.1 | 23.4 | 21.0 | 17.9 | 10.5 | 14.4 | 14.9 | 11.6 | 17.9 |
| <b>Rural area</b>          |      |      |      |      |      |      |      |      |      |      |      |      |      |      |      |
| Preterm birth              | 31.5 | 33.7 | 33.2 | 36.1 | 26.2 | 19.6 | 24.1 | 19.1 | 22.9 | 29   | 28.6 | 31.3 | 29.5 | 32.3 | 27   |
| Intrapartum complications  | 29.2 | 32.3 | 26.8 | 26.1 | 29.3 | 6.4  | 6.2  | 6.1  | 5.2  | 5.4  | 23.8 | 25.7 | 21.3 | 20.1 | 22.3 |
| Pneumonia                  | 10.0 | 6.7  | 8.7  | 8.4  | 8.4  | 18.6 | 14.8 | 18.7 | 18.9 | 12.4 | 12   | 8.7  | 11.3 | 11.5 | 9.6  |
| Diarrhea                   | 0.1  | 0.0  | 0.0  | 0.0  | 0.2  | 1.4  | 2.4  | 1.3  | 0.0  | 1.1  | 0.4  | 0.6  | 0.3  | 0    | 0.5  |
| Tetanus                    | 0.0  | 0.0  | 0.0  | 0.0  | 0.0  | 0.7  | 0.0  | 0.0  | 0.0  | 0.0  | 0.2  | 0    | 0    | 0    | 0    |
| HIV                        | 0.0  | 0.0  | 0.0  | 0.0  | 0.0  | 0.0  | 0.0  | 0.0  | 0.0  | 0.0  | 0    | 0    | 0    | 0    | 0    |
| Neonatal sepsis/meningitis | 1.3  | 2.0  | 2.2  | 1.9  | 2.0  | 5.7  | 3.5  | 7.4  | 4.3  | 9.1  | 2.4  | 2.4  | 3.6  | 2.6  | 4.1  |
| Other infectious diseases  | 0.2  | 0.1  | 0.2  | 0.2  | 0.0  | 0.4  | 0.0  | 0.4  | 0.0  | 0.0  | 0.3  | 0.1  | 0.2  | 0.1  | 0    |
| Congenital malformations   | 15.1 | 11.7 | 15.7 | 16.8 | 19.8 | 21.4 | 21.4 | 27.0 | 23.3 | 22.0 | 16.6 | 14.1 | 18.7 | 18.7 | 20.4 |
| Other diseases             | 12.5 | 13.5 | 13.2 | 10.4 | 14.0 | 25.7 | 27.6 | 20.0 | 25.4 | 21.0 | 15.7 | 17.1 | 15   | 14.7 | 16.1 |

1  
2  
3  
4  
5 218  
6  
7 219  
8  
9 220  
10  
11 221  
12  
13  
14 222  
15  
16  
17 223

Table 2. Leading causes of death in neonates in China from 2014 to 2018

| Causes of death | Cause-specific mortality (per 100,000livebirths) |       |       |       |      |                                 |                    |      |      |      |      |                                 |                          |       |       |       |       |                                 |
|-----------------|--------------------------------------------------|-------|-------|-------|------|---------------------------------|--------------------|------|------|------|------|---------------------------------|--------------------------|-------|-------|-------|-------|---------------------------------|
|                 | 0-6 (<7) days newborns                           |       |       |       |      |                                 | 7-27 days newborns |      |      |      |      |                                 | 0-27 (<28) days newborns |       |       |       |       |                                 |
|                 | 2014                                             | 2015  | 2016  | 2017  | 2018 | Average annual decline rate (%) | 2014               | 2015 | 2016 | 2017 | 2018 | Average annual decline rate (%) | 2014                     | 2015  | 2016  | 2017  | 2018  | Average annual decline rate (%) |
| Nationalwide    |                                                  |       |       |       |      |                                 |                    |      |      |      |      |                                 |                          |       |       |       |       |                                 |
| Preterm birth   | 144.8                                            | 133.5 | 113.8 | 115.7 | 73.4 | 12.7 (15.1,10.2)**              | 25.9               | 33.7 | 26.0 | 28.7 | 33.2 | -3.2 (2.4,-9.1) △               | 170.7                    | 167.2 | 139.8 | 144.4 | 106.6 | 9.7 (7.4, 11.9)**               |
| Intrapartum     | 130.2                                            | 128.7 | 96.1  | 84.5  | 78.2 | 13.5                            | 11.5               | 9.8  | 7.8  | 8.0  | 6.4  | 12.7                            | 141.7                    | 138.5 | 103.9 | 92.5  | 84.6  | 13.5 (11.0,                     |

40  
41  
42  
43  
44  
45  
46  
47

|                                       |      |      |      |      |      |                      |      |      |      |      |      |                         |       |      |      |      |      |                            |
|---------------------------------------|------|------|------|------|------|----------------------|------|------|------|------|------|-------------------------|-------|------|------|------|------|----------------------------|
| <b>complications</b>                  |      |      |      |      |      | (16.1,10.9)**        |      |      |      |      |      | (21.3,3.3)**            |       |      |      |      |      | 15.9)**                    |
| <b>Pneumonia</b>                      | 42.4 | 27.9 | 32.1 | 25.7 | 21.7 | 13.6<br>(18.3,8.7)** | 23.7 | 18.8 | 23.6 | 23.4 | 13.3 | 7.2 (13.1,0.8)<br>*     | 66.1  | 46.7 | 55.7 | 49.1 | 35   | 11.0<br>(7.1,<br>14.7)**   |
| <b>Diarrhea</b>                       | 0.4  | 0.0  | 0.0  | 0.0  | 0.5  | -                    | 1.8  | 2.8  | 1.4  | 0.2  | 1.2  | 24.5<br>(41.7,2.1) △    | 2.2   | 2.8  | 1.4  | 0.2  | 1.7  | 20.1 (-<br>2.0,<br>37.4) △ |
| <b>Tetanus</b>                        | 0.0  | 0.0  | 0.0  | 0.0  | 0.0  | -                    | 0.8  | 0.0  | 0.0  | 0.0  | 0.0  | -                       | 0.8   | 0    | 0    | 0    | 0    | -                          |
| <b>HIV</b>                            | 0.0  | 0.0  | 0.0  | 0.0  | 0.0  | -                    | 0.0  | 0.0  | 0.0  | 0.0  | 0.0  | -                       | 0     | 0    | 0    | 0    | 0    | -                          |
| <b>Neonatal<br/>sepsis/meningitis</b> | 7.2  | 8.4  | 9.4  | 7.6  | 8.3  | -2 (8.2,-13.3)<br>△  | 7.3  | 5.9  | 9.9  | 7.4  | 11.3 | -12.1 (-0.9,-<br>24.5)* | 14.5  | 14.3 | 19.3 | 15   | 19.6 | -6.5 (-<br>14.7,<br>1.2) △ |
| <b>Other infectious<br/>diseases</b>  | 1.4  | 1.1  | 0.8  | 0.9  | 0.0  | 30.1 (51,0.3)<br>△   | 0.4  | 0.0  | 0.6  | 0.0  | 0.0  | 35.6 (68,-<br>29.5) △   | 1.8   | 1.1  | 1.4  | 0.9  | 0    | 33.1<br>(7.9,<br>51.4)*    |
| <b>Congenital<br/>malformations</b>   | 69.8 | 50.6 | 57.3 | 53.5 | 52.3 | 5.6 (9.3,1.8)<br>**  | 31.9 | 31.7 | 34.6 | 29.3 | 26.2 | 4.3 (9.4,-1) △          | 101.7 | 82.3 | 91.9 | 82.8 | 78.5 | 5.1 (2.0,<br>8.1)**        |
| <b>Other diseases</b>                 | 52.8 | 53.6 | 45.9 | 31.6 | 40.2 | 10.4                 | 33.3 | 36.4 | 27.1 | 31.8 | 23.6 | 7.4 (12.3,2.2)          | 86.1  | 90   | 73   | 63.4 | 63.8 | 9.2 (5.9,                  |

|                               |      |      |      |      |      |                         |      |      |      |      |      |                          |       |      |      |      |      |                            |
|-------------------------------|------|------|------|------|------|-------------------------|------|------|------|------|------|--------------------------|-------|------|------|------|------|----------------------------|
|                               |      |      |      |      |      | (14.3,6.2)**            |      |      |      |      |      | **                       |       |      |      |      |      | 12.3)**                    |
| Urban area                    |      |      |      |      |      |                         |      |      |      |      |      |                          |       |      |      |      |      |                            |
| Preterm birth                 | 99.7 | 70.9 | 55.6 | 69.6 | 44.2 | 15<br>(19.4,10.4)**     | 11.5 | 22.0 | 18.9 | 14.7 | 19.1 | -4.2 (6.2,-<br>15.7) △   | 111.2 | 92.9 | 74.5 | 84.3 | 63.3 | 11.4<br>(7.1,<br>15.5)**   |
| Intrapartum<br>complications  | 78.6 | 70.9 | 59.0 | 53.1 | 36.9 | 15.8<br>(20.5,10.9)**   | 13.4 | 9.3  | 4.6  | 8.3  | 4.3  | 21.2<br>(32.7,7.9)*      | 92    | 80.2 | 63.6 | 61.4 | 41.2 | 16.4<br>(11.8,<br>20.7)**  |
| Pneumonia                     | 20.4 | 18.7 | 22.3 | 12.2 | 8.0  | 18 (26.5,8.5)<br>**     | 8.4  | 7.4  | 12.6 | 10.7 | 5.5  | 2.7 (15.8,-<br>12.4) △   | 28.8  | 26.1 | 34.9 | 22.9 | 13.5 | 12.4<br>(4.5,<br>19.7)**   |
| Diarrhea                      | 0.0  | 0.0  | 0.0  | 0.0  | 0.0  | -                       | 0.6  | 0.7  | 0.0  | 0.5  | 0.6  | 2.7 (51.8,-<br>96.6) △   | 0.6   | 0.7  | 0    | 0.5  | 0.6  | 2.7 (-<br>96.6,<br>51.8) △ |
| Tetanus                       | 0.0  | 0.0  | 0.0  | 0.0  | 0.0  | -                       | 0.0  | 0.0  | 0.0  | 0.0  | 0.0  | -                        | 0     | 0    | 0    | 0    | 0    | -                          |
| HIV                           | 0.0  | 0.0  | 0.0  | 0.0  | 0.0  | -                       | 0.0  | 0.0  | 0.0  | 0.0  | 0.0  | -                        | 0     | 0    | 0    | 0    | 0    | -                          |
| Neonatal<br>sepsis/meningitis | 7.7  | 6.0  | 9.7  | 8.3  | 12.3 | -13.8 (1.9,-<br>32.1) △ | 2.5  | 6.7  | 6.9  | 9.2  | 8.6  | -25.5 (-5.7,-<br>49.1)** | 10.2  | 12.7 | 16.6 | 17.5 | 20.9 | 2.7 (-<br>96.6,            |

|                                  |       |       |       |       |      |                      |      |      |      |      |      |                        |       |       |       |       |       |                            |
|----------------------------------|-------|-------|-------|-------|------|----------------------|------|------|------|------|------|------------------------|-------|-------|-------|-------|-------|----------------------------|
|                                  |       |       |       |       |      |                      |      |      |      |      |      |                        |       |       |       |       |       | 51.8)**                    |
| <b>Other infectious diseases</b> | 1.9   | 2.0   | 1.1   | 1.5   | 0.0  | 33 (56,-1.9)<br>△    | 0.0  | 0.0  | 0.6  | 0.0  | 0.0  | 2.7 (76.2,-<br>297.1)△ | 1.9   | 2     | 1.7   | 1.5   | 0     | 25.2 (-<br>7.7,<br>48.1) △ |
| <b>Congenital malformations</b>  | 48.6  | 38.8  | 37.2  | 31.2  | 23.3 | 14.9<br>(20.9,8.4)** | 24.3 | 25.4 | 20.1 | 15.1 | 17.9 | 10.8 (19,1.8)*         | 72.9  | 64.2  | 57.3  | 46.3  | 41.2  | 13.6<br>(8.4,<br>18.5)**   |
| <b>Other diseases</b>            | 23.6  | 28.7  | 24.1  | 15.1  | 27.0 | 3.5 (11.8,-<br>5.5)△ | 13.5 | 18.1 | 19.4 | 15.6 | 12.3 | 3.3 (13.3,-7.8)<br>△   | 37.1  | 46.8  | 43.5  | 30.7  | 39.3  | 3.2 (-<br>3.7, 9.7)<br>△   |
| <b>Rural area</b>                |       |       |       |       |      |                      |      |      |      |      |      |                        |       |       |       |       |       |                            |
| <b>Preterm birth</b>             | 165.0 | 161.4 | 139.8 | 136.2 | 86.4 | 12 (15.2,8.8)<br>**  | 32.2 | 38.9 | 29.1 | 35.1 | 39.5 | -4.1 (2.9,-<br>11.7)△  | 197.2 | 200.3 | 168.9 | 171.3 | 125.9 | 9.2 (6.3,<br>12.1)**       |
| <b>Intrapartum complications</b> | 153.2 | 154.5 | 112.6 | 98.5  | 96.6 | 13.1<br>(16.3,9.7)** | 10.6 | 10.0 | 9.3  | 8.0  | 7.4  | 8.2 (20.2,-5.5)<br>△   | 163.8 | 164.5 | 121.9 | 106.5 | 104   | 12.8<br>(9.5,<br>15.9)**   |
| <b>Pneumonia</b>                 | 52.3  | 32.0  | 36.4  | 31.7  | 27.8 | 12.9<br>(18.8,6.5)** | 30.5 | 23.9 | 28.5 | 29.1 | 16.9 | 7.6 (14.9,-0.4)<br>△   | 82.8  | 55.9  | 64.9  | 60.8  | 44.7  | 10.8<br>(5.9,<br>15.5)**   |

|                            |      |      |      |      |      |                               |      |      |      |      |      |                                |       |       |       |      |      |                                 |
|----------------------------|------|------|------|------|------|-------------------------------|------|------|------|------|------|--------------------------------|-------|-------|-------|------|------|---------------------------------|
| Diarrhea                   | 0.6  | 0.0  | 0.0  | 0.0  | 0.7  | -                             | 2.3  | 3.8  | 2.0  | 0.0  | 1.5  | 25.1 (45.4,-2.8) <sup>△</sup>  | 2.9   | 3.8   | 2     | 0    | 2.2  | 25.5 (-0.3, 44.6) <sup>*</sup>  |
| Tetanus                    | 0.0  | 0.0  | 0.0  | 0.0  | 0.0  | -                             | 1.2  | 0.0  | 0.0  | 0.0  | 0.0  | -                              | 1.2   | 0     | 0     | 0    | 0    | -                               |
| HIV                        | 0.0  | 0.0  | 0.0  | 0.0  | 0.0  | -                             | 0.0  | 0.0  | 0.0  | 0.0  | 0.0  | -                              | 0     | 0     | 0     | 0    | 0    | -                               |
| Neonatal sepsis/meningitis | 7.0  | 9.4  | 9.3  | 7.3  | 6.6  | 3.3 (16.7,-12.4) <sup>△</sup> | 9.4  | 5.7  | 11.2 | 6.6  | 12.4 | -7.3 (6.7,-23.5) <sup>△</sup>  | 16.4  | 15.1  | 20.5  | 13.9 | 19   | -2.3 (-13.2, 7.7) <sup>△</sup>  |
| Other infectious diseases  | 1.2  | 0.6  | 0.7  | 0.7  | 0.0  | 30.3 (60.9,-24) <sup>△</sup>  | 0.6  | 0.0  | 0.6  | 0.0  | 0.0  | 42.4 (82.5,-89.3) <sup>△</sup> | 1.8   | 0.6   | 1.3   | 0.7  | 0    | 29.7 (-13.7, 56.6) <sup>△</sup> |
| Congenital malformations   | 79.3 | 55.9 | 66.2 | 63.5 | 65.2 | 3.3 (8.2,-1.8) <sup>△</sup>   | 35.2 | 34.5 | 41.1 | 35.7 | 30.0 | 2.5 (9.1,-4.6) <sup>△</sup>    | 114.5 | 90.4  | 107.3 | 99.2 | 95.2 | 3.0 (-1.2, 6.9) <sup>△</sup>    |
| Other diseases             | 65.8 | 64.7 | 55.6 | 39.0 | 46.1 | 11.6 (16.5,6.4) <sup>**</sup> | 42.2 | 44.6 | 30.5 | 39.0 | 28.6 | 8.5 (14.6,1.9) <sup>*</sup>    | 108   | 109.3 | 86.1  | 78   | 74.7 | 10.3 (6.3, 14.2) <sup>**</sup>  |

(\*\* means p value<0.01, \* means p value<0.05, △ means p value≥0.05)

1  
2  
3  
4  
5 226  
6  
7 227  
8  
9 228  
10  
11 229  
12  
13  
14 230  
15  
16 231  
17  
18 232  
19  
20 233  
21  
22 234  
23  
24 235  
25  
26 236  
27  
28 237  
29  
30 238  
31  
32 239  
33  
34 240  
35  
36  
37  
38  
39  
40  
41  
42  
43  
44  
45  
46  
47

For peer review only

1  
2  
3  
4  
5  
6  
7  
8  
9  
10  
11  
12  
13  
14  
15  
16  
17  
18  
19  
20  
21  
22  
23  
24  
25  
26  
27  
28  
29  
30  
31  
32  
33  
34  
35  
36  
37  
38  
39  
40  
41  
42  
43  
44  
45  
46  
47

241

242

243

244

245

For peer review only

1  
2  
3  
4 246 The death cause distribution and AADR were also significantly different among urban-  
5  
6  
7 247 rural areas. In urban areas, preterm birth, intrapartum complication, and congenital  
8  
9 248 anomalies also accounting the largest proportion of all deaths cause from 2014 to 2018.  
10  
11  
12 249 Moreover, the AADR of preterm birth, intrapartum complications, pneumonia, and  
13  
14 250 congenital malformations in urban areas were all larger than that of the national level. In  
15  
16  
17 251 rural areas, the mortality rate of preterm birth, intrapartum complication, and congenital  
18  
19 252 anomalies significantly decreased. Additionally, the NMR of diarrhea have sharply  
20  
21  
22 253 decreased, with AADR was 25.5% ( $p<0.001$ ). (See **Table 2**)  
23  
24  
25 254

26  
27  
28 255 In contrast, the urban-rural gap still existed. The contribution of tetanus among neonates in  
29  
30 256 urban areas remains zero during the study period, while the rate in rural areas has been  
31  
32  
33 257 eliminated until 2015. In 2018, the neonatal mortality in rural areas was almost twice as  
34  
35  
36 258 high as in urban areas due to preterm birth, intrapartum complications, and congenital  
37  
38 259 malformations. Moreover, during the study period, the largest number of neonatal deaths  
39  
40  
41 260 in the urban and rural areas was pneumonia, increased from 2.9 times (82.8 per 100,000  
42  
43  
44 261 live births in rural areas VS 28.8 per 100,000 live births in urban areas) in 2014 to 3.3 times  
45  
46 262 (44.7 per 100,000 live births in rural areas VS 13.5 per 1000 live births in urban areas) in  
47  
48  
49 263 2018. (See **Table 2**) In the disease proportion aspect, the proportion of intrapartum  
50  
51 264 complications and pneumonia in rural areas significantly higher than that of urban areas.  
52  
53  
54 265 (See Figure 2B&C) According to the data analysis, causes of neonatal death varied between

1  
2  
3  
4  
5  
6  
7  
8  
9  
10  
11  
12  
13  
14  
15  
16  
17  
18  
19  
20  
21  
22  
23  
24  
25  
26  
27  
28  
29  
30  
31  
32  
33  
34  
35  
36  
37  
38  
39  
40  
41  
42  
43  
44  
45  
46  
47  
48  
49  
50  
51  
52  
53  
54  
55  
56  
57  
58  
59  
60

urban and rural areas ( $P<0.05$ ), but the correlation between neonatal mortality and whether the newborn lived in urban or rural areas was weak (Cramer's  $V=0.129$ ).

The mortality rates have also shown difference when divided neonates into early neonates (0-6 days) and late neonates (7-28 days). Nationwide, except for neonatal sepsis (or meningitis) and diarrhea, the mortality rate of other causes of death of early neonates was significantly higher than that of late neonates, with the biggest difference being intrapartum complications, preterm birth, and congenital malformations. In 2018, the mortality rate of preterm birth was 73.4 per 100,000 livebirth in early neonates and 33.2 per 100,000 livebirth in late neonates. In the same year, the mortality rate of congenital malformations was 52.3 per 100,000 livebirth in early neonates and 26.2 per 100,000 livebirth in late neonates. It is worth noting that intrapartum complications were the second leading cause of death among 0-28 days newborns in China from 2014 to 2018, with the mortality rate of 78.2 per 100,000 livebirth in early neonates and only 6.4 per 100,000 livebirth in late neonates (See **Table 2**).

*3. Neonate Diagnosis Facilities Level in China between 2014 and 2018*

1  
2  
3  
4 283 The children's diagnosis facilities level has also be included in surveillance. Nationwide,  
5  
6 284 from 2014 to 2018, the proportion of neonate diagnosis at the provincial (or municipal)  
7  
8  
9 285 level health facilities has significantly increased, and the proportion of the district (or  
10  
11 286 county) level has decreased. Moreover, the proportion of township level and village level  
12  
13  
14 287 have both fluctuating declined during this period. In 2018, the proportion of neonate who  
15  
16  
17 288 has not to seek any medical care has minimized, which declined to 3.9% in 2018. (See  
18  
19 289 **Figure 3**)

20  
21  
22  
23 290  
24  
25  
26 291 In an urban aspect, from 2014 to 2018, the majority of children (accounted for over 80%)  
27  
28 292 in urban areas have been diagnosed at provincial (or municipal) level medical facilities.  
29  
30  
31 293 The proportion of the district (or county) level and township -level both have a slight rise  
32  
33 294 between 2014 and 2018. As a result, the percentage of children who have not to seek  
34  
35 295 medical care has declined, with 1.9% in 2014 and 1.1% in 2018. (See **Figure 3**)

36  
37  
38  
39 296  
40  
41  
42  
43 297 On the contract, the diagnosis contribution figure of rural areas was different. Although the  
44  
45 298 proportion of provincial (or municipal) level has shown a growth trend from 2014 to 2018,  
46  
47 299 the proportion in rural areas have only half of that in urban areas. Moreover, the proportion  
48  
49  
50 300 of street-level diagnoses in the urban area is reduced to 1.4% in 2018, while this proportion  
51  
52  
53 301 in rural areas fluctuated and remained at 3.7% in the same year. Another significant

1  
2  
3  
4  
5  
6  
7  
8  
9  
10  
11  
12  
13  
14  
15  
16  
17  
18  
19  
20  
21  
22  
23  
24  
25  
26  
27  
28  
29  
30  
31  
32  
33  
34  
35  
36  
37  
38  
39  
40  
41  
42  
43  
44  
45  
46  
47  
48  
49  
50  
51  
52  
53  
54  
55  
56  
57  
58  
59  
60

contributor is the proportion of children who have not sought medical care. The proportion of neonate who has not to seek medical care has decreased, and still, 5.5% of children have not sought any medical advice. (See **Figure 3**)

**Discussion**

The results of this study show that the NMR in urban and rural areas of China have decreased significantly between 2014 and 2018. In addition, there were significant differences in NMR between urban and rural areas, which were consistent with significant differences in NMR between countries and regions globally<sup>20,21</sup>.

From 2014 to 2018, Chinese NMR continued to decline, and it was dropped quickly. It benefits from the improvement of medical treatment at all levels of health facilities, and all levels of government attached great importance to strengthen the construction of the pediatric institution, raise pediatricians' payment, and continue to implement neonatal asphyxia recovery training program<sup>22</sup>. As a result, neonatal deaths from pneumonia and infectious diseases, intrapartum complications, and premature delivery were significantly reduced.

320

321 China has implemented the Safe Maternal Initiative and the National Program to Reduce  
322 Maternal Mortality and Eliminate Tetanus, China has officially eliminated neonatal tetanus  
323 in 2012<sup>23</sup>, and from 2015 to 2018, the NMR of neonatal tetanus remained 0. Moreover,  
324 through the success of the Prevention of Mother-to-child Transmission of HIV, Syphilis,  
325 and Hepatitis B Program, the HIV/AIDS mortality rate has also been 0 from 2014 to  
326 2018<sup>24,25</sup>. Although the national neonatal mortality in 2018 was already less than 12 deaths  
327 per 1000 live births, the preventable deaths still accounted for 73.9%, mainly were  
328 pneumonia, intrapartum complication, premature birth. Among these diseases, the  
329 proportion of preterm birth was highest in both nationwide, urban areas, and rural areas. In  
330 the recent two decades, the prevalence of preterm birth has significantly increased<sup>18</sup>,  
331 especially after the Two-child Policy<sup>26</sup> was implemented in China. The mortality rate  
332 among preterm birth infants was apparently higher than the full-term infant, and the risk of  
333 mortality increases proportionally with decreasing gestational age<sup>27</sup>. Furthermore, with the  
334 widespread development of assisted reproductive technique (ART), the incidence of  
335 monozygotic twins has increased significantly<sup>28</sup>. The NMR of twins is several times higher  
336 than that of singletons<sup>29-31</sup>.

337

338 Addressing the issue of preterm birth may require different priorities in rural and urban

1  
2  
3  
4  
5  
6  
7  
8  
9  
10  
11  
12  
13  
14  
15  
16  
17  
18  
19  
20  
21  
22  
23  
24  
25  
26  
27  
28  
29  
30  
31  
32  
33  
34  
35  
36  
37  
38  
39  
40  
41  
42  
43  
44  
45  
46  
47  
48  
49  
50  
51  
52  
53  
54  
55  
56  
57  
58  
59  
60

339 areas. Because of the good management of many curable neonatal complications (such as  
340 pneumonia), the proportion of preterm birth in urban areas is obviously larger than that of  
341 rural areas<sup>32</sup>. Hence, urban areas need to pay more attention to preventing premature deaths  
342 less than 32 weeks of gestation. For rural areas, the local government needs to focus on the  
343 prevention of premature infants at 32-36 weeks and continue to invest in medical services  
344 to improve medical services accessibility for women and children in rural areas.

345

346 In addition, from 2014 to 2018, the neonatal mortality rate in rural areas due to preterm  
347 birth, intrapartum complications, pneumonia, and congenital malformations was  
348 decreasing in rural areas but was still significantly higher than in urban areas. (See **Table**  
349 **2**) The higher mortality rate may be linked to the relatively poorer economy, lower quality  
350 of health care, and lack of accessibility to health care in rural China. The average median  
351 net income per capita was ¥39251 (about US \$6000) in urban China, but ¥14617 (about  
352 the US \$2234) in rural China in 2018<sup>33</sup>. The annual spending on health care per capita  
353 accounted for 7.8% in urban China, but 10.2% in rural China in 2018<sup>34</sup>. The average health  
354 care personnel were 4.0 per 1000 people in urban China and 1.8 per 1000 people in rural  
355 China in 2018<sup>34</sup>. The number of beds in medical institutions per 1,000 people in urban areas  
356 was 8.70, compared with 4.56 in rural areas in 2018<sup>34</sup>.

Not only markedly difference the NMR of urban and rural areas has shown, but also significantly difference in early and late neonates. The results of this study showed that the range of cause-specific mortality of late neonates was significantly less than that of early neonates, both nationwide and urban-rural areas. (See **Table 2**) Therefore, for preventable neonatal diseases, the focus should be on early neonates, especially for early neonates in rural areas.

For neonates, surviving from preterm birth, intrapartum complication and pneumonia are close linking to accessibility to health care, local hospitals' obstetrics and neonates departments' treatment level, and rescue skills<sup>35,36</sup>. Therefore, the issue can be addressed from the following four aspects.

Firstly, the local governments need to strengthen the construction of RNTN (Regional Neonatal Transport Network), carry out the transport plan according to the Guidelines for the Construction and Management of Critical Neonatal Treatment Center<sup>37</sup>, and ensure the applying of professional medical staff and newborn rescue equipment for neonatal transport. Secondly, one study in Japan has pointed out that the medical care resources (including Neonatal Intensive Care Unit (NICU), midwives, emergency physicians, and emergency medical care centers) would impact the NMR decline<sup>38</sup>. Therefore, the local

1  
2  
3  
4  
5  
6  
7  
8  
9  
10  
11  
12  
13  
14  
15  
16  
17  
18  
19  
20  
21  
22  
23  
24  
25  
26  
27  
28  
29  
30  
31  
32  
33  
34  
35  
36  
37  
38  
39  
40  
41  
42  
43  
44  
45  
46  
47  
48  
49  
50  
51  
52  
53  
54  
55  
56  
57  
58  
59  
60

governments may base on the Administration guide (proposal) of the Neonatal Physician Branch of the Chinese Physician Association<sup>39</sup> to grading neonatal wards and establishing NICU after analyzing local medical establishment plan and newborn medical treatment needs. Thirdly, local health departments can regularly organize multi-level , especially provincial, prefecture-level and district-level) newborn health training programs. In rural areas, with the policies support of the New Rural Construction and the Targeted Poverty Alleviation<sup>40,41</sup>, the improved rural transport and higher incomes have prompted the enhanced accessibility of health services, and the proportion of rural children receiving medical treatment in provincial and municipal hospitals has significantly increased. The proportion of rural neonate diagnosis at the provincial (or municipal) level health facilities has significantly increased from 39.2% to 47.6% from 2014 to 2018 (See **Figure 3**). Set training objectives for medical staff in health facilities of different levels, and strengthen the newborn treatment technology in each level of health facilities. Especially for the health workers in rural areas, the newborn resuscitation training needs to be specifically strengthened. Fourthly, the local communities can strengthen publicity to encourage caregivers to take children to attend the health facilities for treatment. As for poor households, local governments can set up special subsidies for them to reduce the economic cost of medical treatment.

## 396 **Conclusion**

397 With the joint efforts of the economic development and the governmental policies and  
398 strategies, the neonatal mortality rate of China has significantly decreased from 2014 to  
399 2018. The gap between neonatal mortality and cause-of-death distribution still existed  
400 between urban and rural areas. The goal of government interventions should be to narrow  
401 the urban-rural gap, reduce the health inequality of neonates, and further take targeted  
402 measures to eliminate the preventable death of neonates, especially premature births, to  
403 achieve the SDGs goal.

404

405

## 406 **Acknowledgments**

407 We thank the institutions and staff of the National Maternal and Child Health Surveillance  
408 System for data collection, data provided, and case investigation.

409

## 410 **Funding**

411 This study was supported by the Ministry of Health, China (grants QT2003-009 and  
412 05wsb-02) and UNICEF (grant YH601-11-1141).

1  
2  
3  
4  
5  
6  
7  
8  
9  
10  
11  
12  
13  
14  
15  
16  
17  
18  
19  
20  
21  
22  
23  
24  
25  
26  
27  
28  
29  
30  
31  
32  
33  
34  
35  
36  
37  
38  
39  
40  
41  
42  
43  
44  
45  
46  
47  
48  
49  
50  
51  
52  
53  
54  
55  
56  
57  
58  
59  
60

413

414 **Author contributions**

415 Data analysis: Yuxi Liu

416 Methodology: Hanmin Liu and Yanping Wang, Leni Kang

417 Data curation: Jun Zhu, Juan Liang, Lei Miao, Xiaoqiong Qiu, Weipeng Xia

418 Software: Chunhua He, Leni Kang and Qi Li

419 Writing – original draft: Yuxi Liu

420 Writing – review, and editing: Yuxi Liu, Hanmin Liu, and Yanping Wang

421

422 **Conflicts of interest**

423 The authors declare no conflicts of interest.

424

425 **Data Availability Statement**

426 This study used data from the NMCHSS. This system is co-established by the National  
427 Health and Family Planning Commission of the People Republic of China and Sichuan  
428 University and finally owned by the National Health and Family Planning Commission of

the People Republic of China. The researchers did not obtain consent to publicly share data. The de-identified data set is available upon request to interested researchers. For data requests, please contact the Department of Science and Technology of West China Second University Hospital, Sichuan University, at: fu2yuankjb@163.com. This department is in charge of all the programs in the hospital, including the data management. One staff from the department monitors this email.

## References

1. UN (2015) . Sustainable Development Goals. <https://sustainabledevelopment.un.org/?menu=1300> (accessed 12th Mar 2020).
2. Department of Maternal and Child Health of China. 2019 report on development of maternal and child health. Beijing, 2019.
3. The State Council Information office of the People's Republic of China. The implementation of "National Program of Action for Child Development in China in 1990s" and "National Program of Action for Child Development in China (2001-2010)". 2001. <http://www.china.org.cn/e-news/news01-4-27-1.htm> (accessed Dec 10th 2020).
4. WHO, UNICEF, UN & World Bank Group (2019) . Levels & Trends in Child Mortality-Report 2019.
5. WHO (2019). Newborns: reducing mortality. <https://www.who.int/news-room/fact-sheets/detail/newborns-reducing-mortality> (accessed 12th Mar 2020).
6. Zhang. CL. (2015) Analysis of surveillance results of 4074 children under 5 years old. Maternal and Child Health Care of China. **30**: 5095-8.
7. Health Ministry of China. Health Statistical Yearbook of China, 1st edn. Beijing, China: Peking Union Medical College press, 2013:201.

1  
2  
3  
4  
5  
6  
7  
8  
9  
10  
11  
12  
13  
14  
15  
16  
17  
18  
19  
20  
21  
22  
23  
24  
25  
26  
27  
28  
29  
30  
31  
32  
33  
34  
35  
36  
37  
38  
39  
40  
41  
42  
43  
44  
45  
46  
47  
48  
49  
50  
51  
52  
53  
54  
55  
56  
57  
58  
59  
60

8. National Working Committee on Children and Women under State Council. National Program for Women and Child Development. [http://www.nwccw.gov.cn/node\\_2427.htm](http://www.nwccw.gov.cn/node_2427.htm) (accessed 12th Mar 2020).

9. UN (2000). Millennium Development Goal. <http://www.un.org/zh/millenniumgoals/getinvolved.shtml> (accessed 12th Mar 2020).

10. Wang Y, Li X, Zhou M, et al. Under-5 mortality in 2851 Chinese counties, 1996-2012: a subnational assessment of achieving MDG 4 goals in China. *Lancet* 2016; **387**(10015): 273-83.

11. National Bureau of Statistics of China (2016). China statistical yearbook 2016. <http://www.stats.gov.cn/tjsj/ndsj/2016/indexch.htm> (accessed 12th Mar 2020).

12. Ministry of Foreign Affairs of China & UN China (2015). Report on China's Implementation of the Millennium Development Goals (2000-2015). [http://cn.chinagate.cn/reports/2015-07/28/content\\_36164105.htm](http://cn.chinagate.cn/reports/2015-07/28/content_36164105.htm) (accessed 12th Mar 2020).

13. Kuruvilla S, Schweitzer J, Bishai D, et al. Success factors for reducing maternal and child mortality. *Bull World Health Organ* 2014; **92**(7): 533-44b.

14. The development of China's Health Care and inhabitant's health status (2018) China Public Health Statistical Yearbook 2018. Peking Union Medical College Publishing House.

15. Bank TW. Mortality rate, neonatal (per 1,000 live births). 2019. <https://data.worldbank.org/indicator/SH.DYN.NMRT> (accessed Dec 11th 2020).

16. Wang Y, Zhu J, He C, Li X, Miao L, Liang J. Geographical disparities of infant mortality in rural China. *Arch Dis Child Fetal Neonatal Ed* 2012; **97**(4): F285-90.

17. He C, Liu L, Chu Y, et al. National and subnational all-cause and cause-specific child mortality in China, 1996-2015: a systematic analysis with implications for the Sustainable Development Goals. *Lancet Glob Health* 2017; **5**(2): e186-e97.

18. Lu R, Li X, Guo S, et al. Neonatal mortality in the urban and rural China between 1996 and 2013: a retrospective study. *Pediatr Res* 2016; **79**(5): 689-96.

19. Nichols EK, Byass P, Chandramohan D, et al. The WHO 2016 verbal autopsy instrument: An international standard suitable for automated analysis by InterVA, InSilicoVA, and Tariff 2.0. *PLoS Med* 2018; **15**(1): e1002486.

20. Yaya S, Uthman OA, Okonofua F, Bishwajit G. Decomposing the rural-urban gap in the factors of under-five mortality in sub-Saharan Africa? Evidence from 35 countries. *BMC Public Health* 2019; **19**(1): 616.
21. Saikia, N., Singh, A., Jasilionis, D., et al. Explaining the rural-urban gap in infant mortality in India. *Demographic Research*, 29(18), 473-506.
22. National health commission, National development and reform commission, the Ministry of Education, the Ministry of Finance, the Ministry of human resources and social security & National Administration of Traditional Chinese Medicine (NATCM) (2016). Circular on the issuance of opinions on strengthening the reform and development of children's medical and health services.  
[http://www.mohrss.gov.cn/SYrlzyhshbzb/shehuibaozhang/zcwj/yiliao/201606/t20160601\\_241098.html](http://www.mohrss.gov.cn/SYrlzyhshbzb/shehuibaozhang/zcwj/yiliao/201606/t20160601_241098.html) (accessed 2nd May 2020).
23. UNICEF (2012). Maternal and neonatal tetanus eliminated in China. <https://www.unicef.cn/en/press-releases/maternal-and-neonatal-tetanus-eliminated-china> (accessed 2nd May 2020).
24. Wang AL, Qiao YP, Wang LH, et al. Integrated prevention of mother-to-child transmission for human immunodeficiency virus, syphilis and hepatitis B virus in China. *Bull World Health Organ* 2015; **93**(1): 52-6.
25. China CDC (2011) . Prevention of mother-to-child transmission of HIV, syphilis and hepatitis b (2011-2013). [http://www.chinacdc.cn/gswsxx/fyxx/201107/t20110704\\_48397.html](http://www.chinacdc.cn/gswsxx/fyxx/201107/t20110704_48397.html) (accessed 2nd May 2020).
26. Institute of party history and literature of the CPC central committee (2019). Memorabilia of the People's Republic of China (October 1949 -- September 2019)  
<http://cpc.people.com.cn/n1/2019/0928/c419242-31378078.html> (accessed 3rd May 2020).
27. Boghossian NS, Geraci M, Edwards EM, Horbar JD. Morbidity and Mortality in Small for Gestational Age Infants at 22 to 29 Weeks' Gestation. *Pediatrics* 2018; **141**(2).
28. Gee RE, Dickey RP, Xiong X, al. e. Impact of monozygotic twinning on multiple births resulting from in vitro fertilization in the United States, 2006-2010. *Am J Obstet Gynecol* 2014; **210**(5): 468.e1-6.
29. Imaizumi Y, Hayakawa K. Infant mortality among singletons and twins in Japan during 1999-2008 on the basis of risk factors. *Twin Res Hum Genet* 2013; **16**(2): 639-44.
30. Saleh Jafarian MA, Mahmoud Mobasher. The Effect of Twin Birth on Neonatal and Infant Mortality

1  
2  
3 507 Rates: A Systematic Review. *International Journal of Epidemiologic Research* 2018; **Summer 5**(3): 113-8.  
4  
5  
6 508 31. Monden CWS, Smits J. Mortality among twins and singletons in sub-Saharan Africa between 1995 and  
7 509 2014: a pooled analysis of data from 90 Demographic and Health Surveys in 30 countries. *Lancet Glob*  
8 510 *Health* 2017; **5**(7): e673-e9.  
9  
10  
11 511 32. Liang J, Mao M, Dai L, et al. Neonatal mortality due to preterm birth at 28-36 weeks' gestation in China,  
12 512 2003-2008. *Paediatr Perinat Epidemiol* 2011; **25**(6): 593-600.  
13  
14  
15 513 33. National Bureau of Statistics of China. Personal income and consumer spending in 2018. 2019.  
16  
17 514 [http://www.stats.gov.cn/tjsj/zxfb/201901/t20190121\\_1645791.html](http://www.stats.gov.cn/tjsj/zxfb/201901/t20190121_1645791.html).  
18  
19  
20 515 34. China NHCo. China Health Statistics Yearbook 2019. Beijing, 2020.  
21  
22 516 35. World Health Organization, Dept. of Reproductive Health and Research; United Nations Population  
23 517 Fund; UNICEF (2003). Managing newborn problems: A guide for doctors, nurses and midwives.  
24  
25  
26 518 36. Bryce J, Boschi-Pinto C, Shibuya K, et al. WHO estimates of the causes of death in children. *Lancet*.  
27 519 2005;365(9465):1147-1152.  
28  
29  
30 520 37. The National Health Commission of China (2017). Guidelines for the Construction and Management  
31 521 of Critical Neonatal Treatment Center.  
32  
33 522 <http://www.nhc.gov.cn/fys/s3581/201801/1048948966a44067974a44187c6a8912.shtml> (accessed 28th Apr  
34 523 2020).  
35  
36  
37 524 38. Matsumoto Y, Nakai A, Nishijima Y, et al. Absence of neonatal intensive care units in secondary  
38 525 medical care zones is an independent risk factor of high perinatal mortality in Japan. *J Obstet Gynaecol Res*  
39 526 2016; **42**(10): 1304-9.  
40  
41  
42 527 39. Neonatal Physician Branch of Chinese Physician Association (2013). Guidelines for graded  
43 528 construction and management of neonatal wards in China (proposal). *Chin J Appl Clin Pediatr*, February,  
44 529 28(3). 231-239.  
45  
46  
47  
48 530 40. Office of the central leading group for financial and economic affairs of China (2006). Five mechanisms  
49 531 of the new socialist countryside. <http://finance.people.com.cn/GB/1037/4132493.html> (accessed 2nd May  
50 532 2020).  
51  
52  
53 533 41. Zhou Y, Guo, Y., Liu, Y, et al. . Targeted poverty alleviation and land policy innovation: Some practice  
54  
55  
56  
57  
58  
59  
60

534 and policy implications from China. Land Use Policy, 74(74), 53-65.

535

536

537

538

539

540

541

542

543

544

545 Figure 1. The national and urban-rural neonatal mortality rates (per 1,000 live births) in

546 China between 2014 and 2018

547 Figure 2A. Causes of deaths in neonates in China, 2018

548 Figure 2B. Causes of deaths in neonates in urban China, 2018

549 Figure 2C. Causes of deaths in neonates in rural China, 2018

1  
2  
3  
4  
5  
6  
7  
8  
9  
10  
11  
12  
13  
14  
15  
16  
17  
18  
19  
20  
21  
22  
23  
24  
25  
26  
27  
28  
29  
30  
31  
32  
33  
34  
35  
36  
37  
38  
39  
40  
41  
42  
43  
44  
45  
46  
47  
48  
49  
50  
51  
52  
53  
54  
55  
56  
57  
58  
59  
60

Figure 3. The proportion of neonatal diagnose level in China from 2014 to 2018

For peer review only

Figure 1. The national and urban–rural neonatal mortality rates (per 1,000 live births) in China between 2014 and 2018

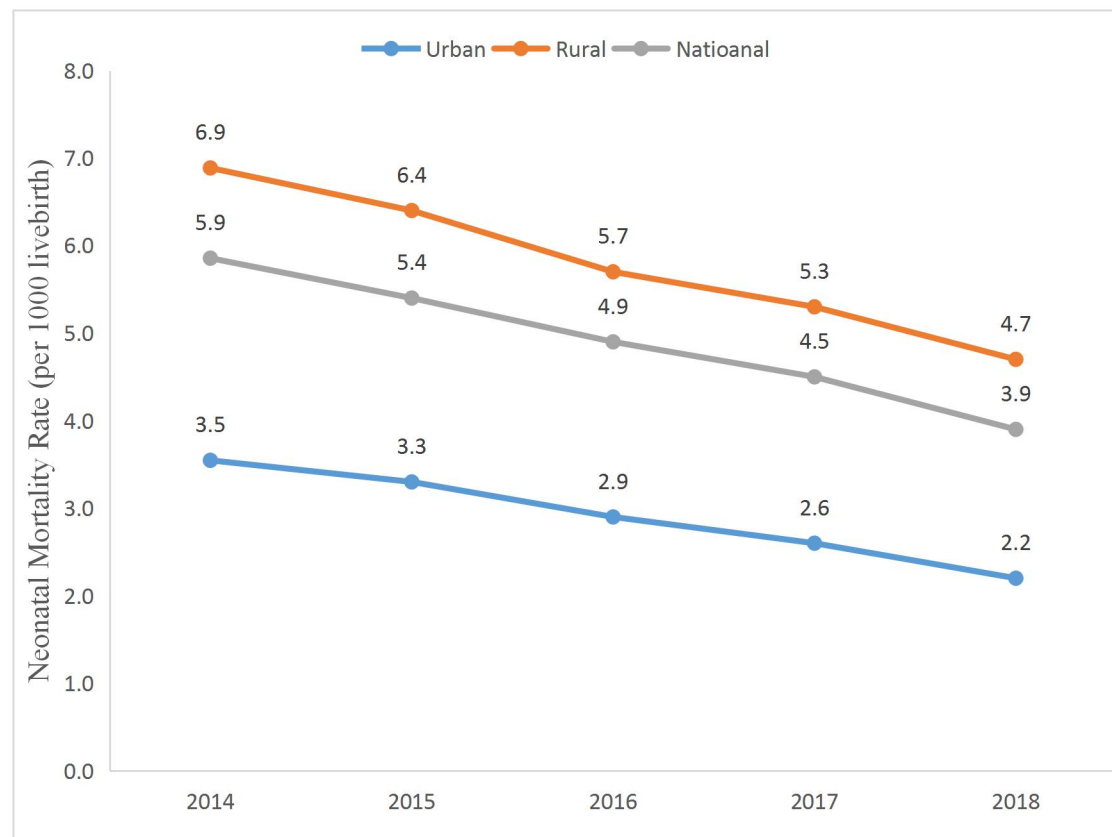

Figure 2A. Causes of deaths in neonates in China, 2018

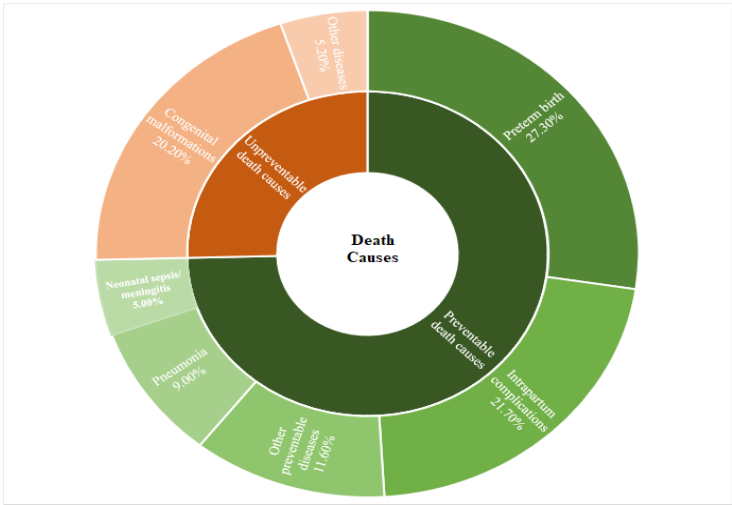

Figure 2B. Causes of deaths in neonates in urban China, 2018

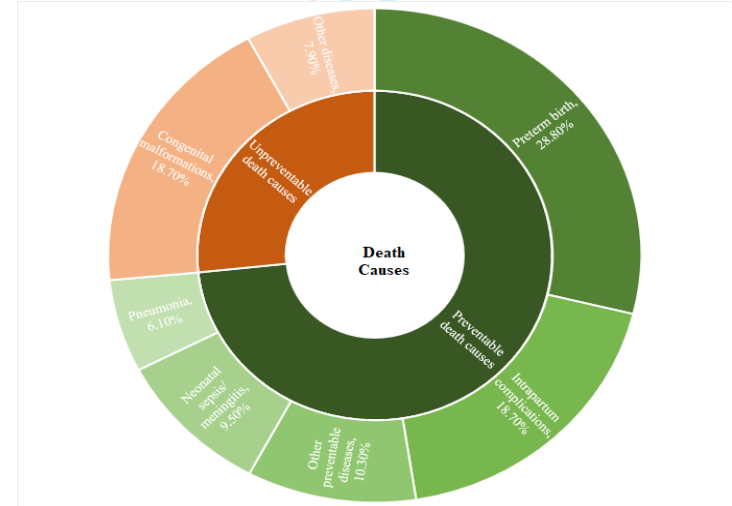

Figure 2C. Causes of deaths in neonates in rural China, 2018

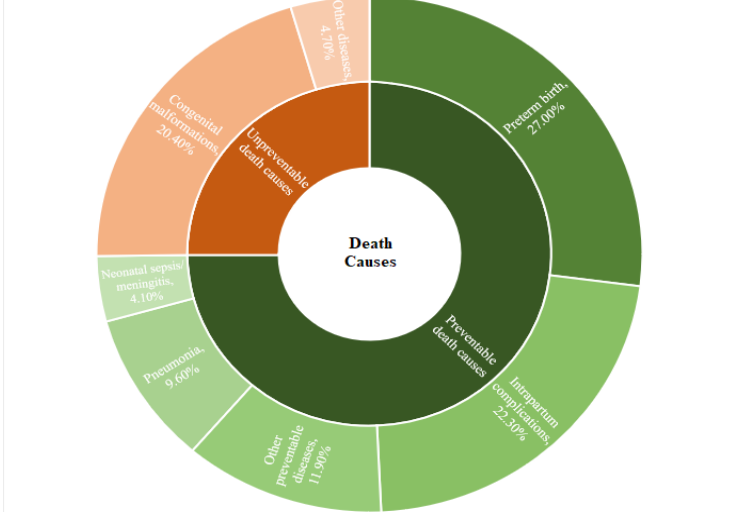

Figure 3. The proportion of neonatal diagnose level in China from 2014 to 2018



Supplement: bmjopen-2020-042654.draft_revisions.pdf [file bmjopen-2020-042654.draft_revisions.pdf]
